# Supplementary material for: ZFTA–RELA Dictates Oncogenic Transcriptional Programs to Drive Aggressive Supratentorial Ependymoma
Source: Oxford University Press journal article supplement (doi:10.1158/2159-8290.cd-20-1066), 2021-03-19
Supplement: 21598290cd201066-sup-247687_2_supp_6955968_qpb2vf.pdf [file 21598290cd201066-sup-247687_2_supp_6955968_qpb2vf.pdf]

Supplementary Figure S2

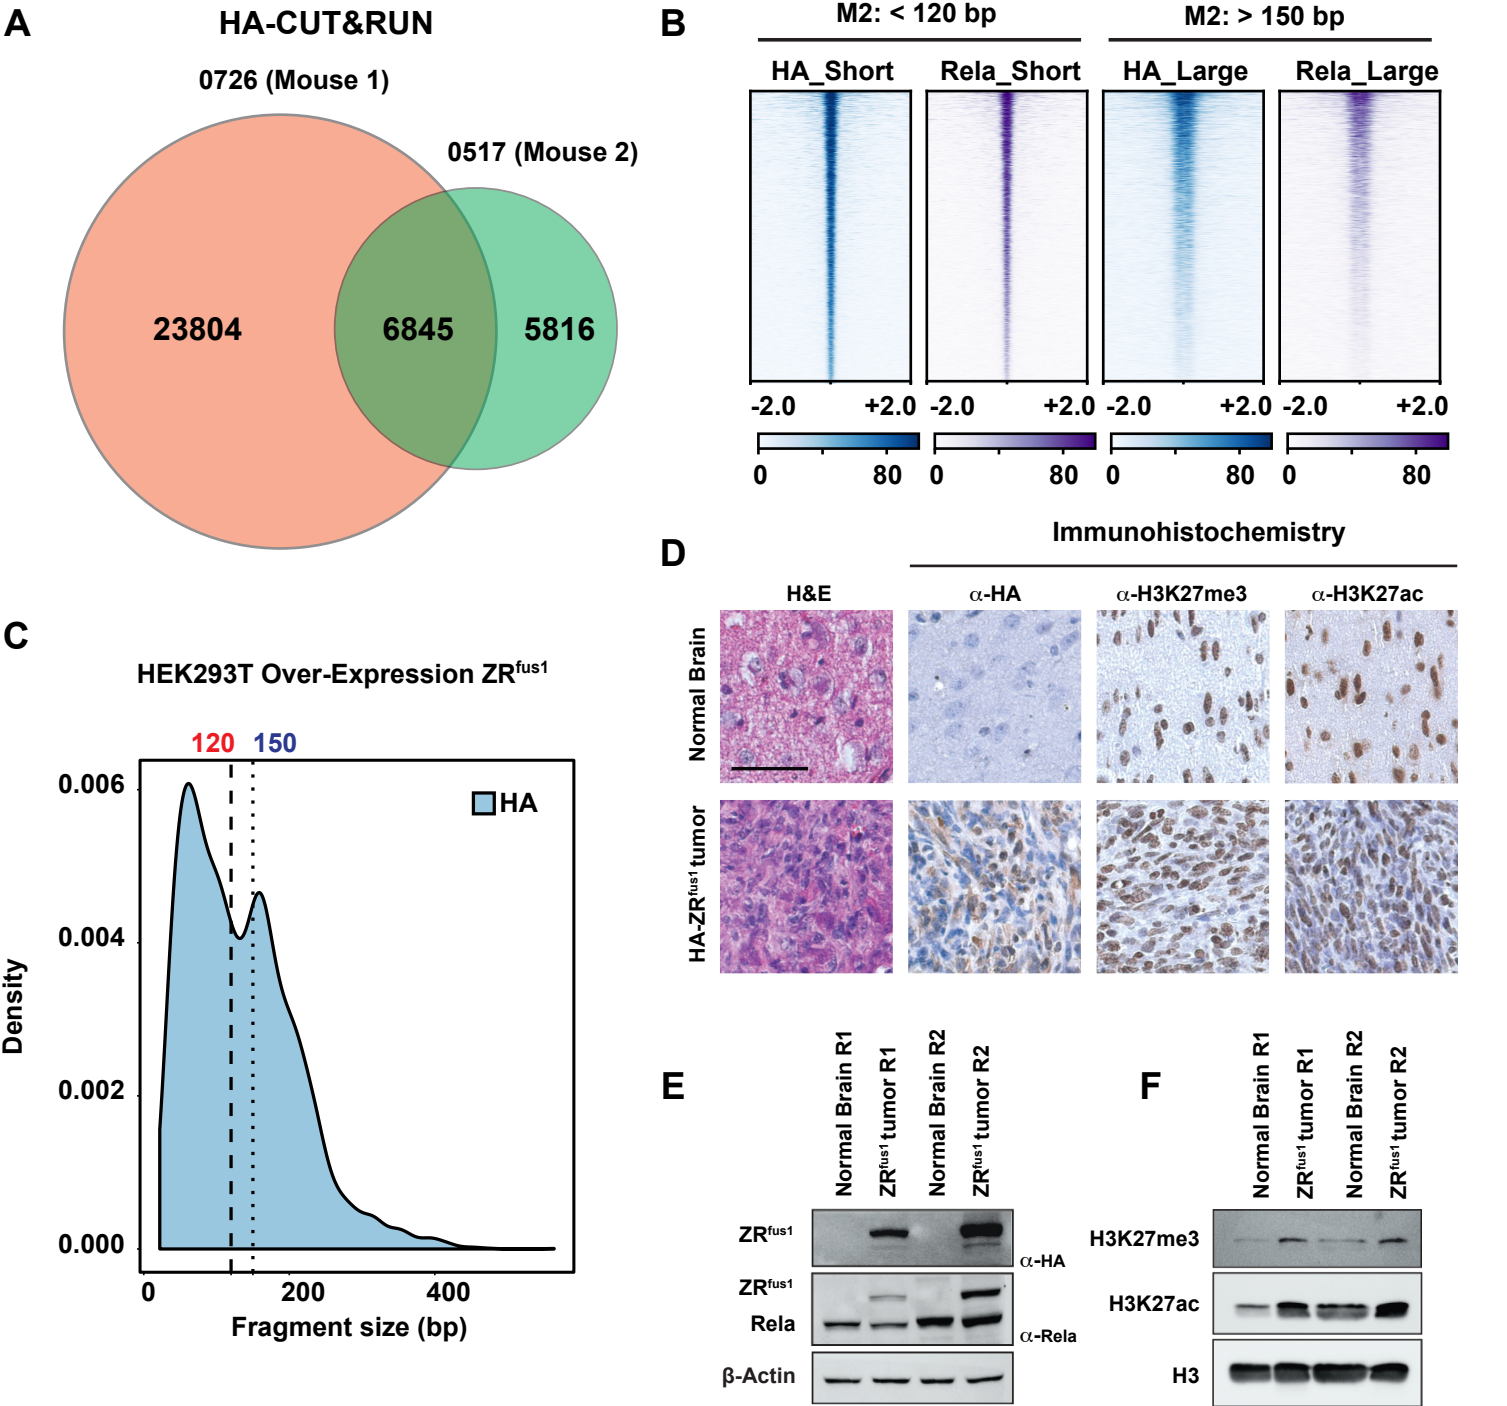

Supplementary Figure S2

(A) Venn diagram overlap of HA CUT&RUN binding sites of two independent IUE ZR<sup>fus1</sup> mouse tumors (0726 and 0517) (B) HA CUT&RUN binding sites divided into small sub-nucleosomal (< 120bp) and nucleosomal (>150bp) fragments (C) Histogram of fragment distribution in HA CUT&RUN of HEK293T cells over-expressing ZR<sup>fus1</sup> (D) H&E staining and immunohistochemistry of normal brain and ZR<sup>fus1</sup> IUE tumors by HA, H3K27me3, and H3K27ac antibodies (E) Western blot analysis of mouse normal brain and mouse ZR<sup>fus1</sup> tumor tissue using antibodies against HA, Rela, and Actb (F) Western blot analysis of histone fractions in mouse normal brain and mouse ZR<sup>fus1</sup> tumor tissue using antibodies against H3K27me3, H3K27ac, and H3.
