# Supplementary material for: ZFTA–RELA Dictates Oncogenic Transcriptional Programs to Drive Aggressive Supratentorial Ependymoma
Source: Oxford University Press journal article supplement (doi:10.1158/2159-8290.cd-20-1066), 2021-03-19
Supplement: 21598290cd201066-sup-247687_2_supp_6955999_qpb2vg.xlsx [file 21598290cd201066-sup-247687_2_supp_6955999_qpb2vg.xlsx]

## Sheet: Differential Gene KO vs Ctl
Supplementary Table S4
Description: Differentially Expressed Genes Between Non-Targeting Control and Rela KO in IUE ZRFUS1 model
FEATURE_ID	P1_FC_RELA3 (ZRFUS1/Non-Targeting)	P3_FC_RELA3 (ZRFUS1/Non-Targeting)	P4_FC_RELA3 (ZRFUS1/Non-Targeting)
0610005C13Rik	0	0	0
0610007P14Rik	-0.524139	-0.931937	-0.285171
0610009B22Rik	0.468554	-0.286089	-0.00129334
0610009L18Rik	0.439565	0.0827836	0.460575
0610009O20Rik	-0.100597	-0.145258	-0.312934
0610010B08Rik	0.00331175	0	0
0610010F05Rik	-0.052703	-0.403664	-0.162645
0610010K14Rik	0.0437126	-0.255815	-0.234098
0610011F06Rik	0.2661	-0.241798	-0.149933
0610012G03Rik	0.103633	-0.122713	-0.205599
0610030E20Rik	-0.248983	-0.00433405	-0.0997416
0610031O16Rik	0	0	0
0610037L13Rik	-0.0101087	-0.521437	-0.155236
0610038B21Rik	0.131506	0.443519	0.606845
0610039H22Rik	-0.121654	-0.182415	-0.356744
0610039K10Rik	-0.35722	-0.148219	-0.0191691
0610040B10Rik	0.4294	-0.481812	-0.676359
0610040F04Rik	0.0372416	-0.17229	-0.12185
0610040J01Rik	0.138016	0.0693948	0
0610043K17Rik	0	-0.221408	-0.0281167
1010001N08Rik	0	-0.140923	0
1110001J03Rik	0.302133	-0.532004	0.340264
1110002L01Rik	-0.0596691	-0.205058	0.299432
1110004E09Rik	0.298609	0.327772	0.537161
1110004F10Rik	0.0891568	-0.127435	0.0142733
1110006O24Rik	0.404818	0.104653	0.0585611
1110007C09Rik	0.467515	0.985158	1.2869
1110008F13Rik	-0.0409677	-0.357493	-0.290414
1110008L16Rik	-0.162639	-0.234933	-0.0624124
1110008P14Rik	0.551716	-1.26357	-0.459844
1110012L19Rik	0.223999	0.15859	0.00174959
1110015O18Rik	0	0	0
1110017D15Rik	-0.312631	-0.19337	-0.427881
1110019D14Rik	0.282043	-0.000657284	-0.24396
1110020A21Rik	0.0477594	0.648403	-0.0591023
1110025L11Rik	0	0	0
1110028F11Rik	0	0	0
1110028F18Rik	0	0	0
1110032A03Rik	0.239636	-0.0868252	-0.202561
1110032F04Rik	0.0607977	-0.0562542	0
1110034G24Rik	0.0559558	-0.0272455	-0.793743
1110036E04Rik	0	0.161686	0
1110037F02Rik	-0.229338	0.026875	-0.0936236
1110038B12Rik	0.192565	1.73007	1.31541
1110038F14Rik	0.161306	0.104711	0.261321
1110046J04Rik	0.368916	2.04985	1.48327
1110051M20Rik	-0.264413	-0.477804	-0.207841
1110058D11Rik	0	0	0
1110059E24Rik	-0.0979367	0.386482	0.259103
1110059G10Rik	-0.190019	0.275999	-0.209112
1110065P20Rik	0.442795	-0.439832	0.0244755
1190002F15Rik	0.510638	1.34829	0.845478
1190002N15Rik	-0.741222	-0.747735	0.202715
1190003K10Rik	0	0	0
1190005I06Rik	-0.110498	0.902164	0.636795
1190007I07Rik	0.761158	0.724342	0.821286
1200014J11Rik	-0.226828	-0.0991643	0.0379275
1300002E11Rik	-0.22718	-0.404735	-0.352429
1300017J02Rik	0	-0.128596	-0.00846217
1500004A13Rik	-0.102491	-0.0114369	0.0226568
1500009C09Rik	-0.0978332	-0.216007	0
1500009L16Rik	-1.18872	-1.51728	-0.869785
1500011B03Rik	-0.100674	-0.361437	-0.156255
1500011K16Rik	0.5566	-0.142947	-0.0533975
1500012F01Rik	0.609173	1.6288	1.25826
1500012K07Rik	0	0	0
1500015A07Rik	-0.140566	-0.402735	-0.254236
1500015L24Rik	0	0.161489	0
1500015O10Rik	-3.26149	-1.35362	1.55171
1500017E21Rik	0.0335216	-0.0579444	-0.00727452
1500026H17Rik	0	0.0431505	-0.0942033
1600002D24Rik	0	-0.12771	0
1600002H07Rik	0.0423352	0.121281	0.000255945
1600002K03Rik	0.224886	0.393935	-0.273735
1600010M07Rik	0	0	0
1600012H06Rik	-0.339478	-0.278476	-0.67296
1600014C10Rik	-0.200191	-0.31113	-0.123076
1600014C23Rik	0	-0.4021	-0.944122
1600014K23Rik	0	0	-0.165942
1600015I10Rik	0.0358941	0	0.0505006
1600019K03Rik	-0.189079	0	0
1600020E01Rik	-0.345731	-0.216832	-0.254841
1600023N17Rik	0.153828	0.0825419	0.294615
1600025M17Rik	0	0	0
1600027J07Rik	0	0	0
1600029I14Rik	0	0	0
1600029O15Rik	0	0	0
1700001C02Rik	0	0	0
1700001C19Rik	0	0	0
1700001D01Rik	-0.16121	0	0
1700001F09Rik	0	0	0
1700001G01Rik	0	0	0
1700001G11Rik	-0.034884	0.537794	0.0435803
1700001G17Rik	0.208044	0.442634	0.0360691
1700001J03Rik	-0.228621	0.438636	-0.614113
1700001J11Rik	0.0361239	-0.0587111	0.0323886
1700001K19Rik	-0.00597681	0.133024	-0.147087
1700001K23Rik	0	0	0
1700001L05Rik	0.251718	0.0313345	0.714211
1700001L19Rik	0.0901825	0.0604742	0.0552548
1700001O22Rik	0.367268	-0.174805	0.14576
1700001P01Rik	0.558128	-0.0375539	0.536729
1700003C15Rik	0	0	0
1700003D09Rik	-0.00418831	0.0926682	0
1700003E16Rik	-0.44556	0.207886	-0.323865
1700003E24Rik	0	0	0
1700003F12Rik	0.134778	0.884993	-0.70317
1700003G13Rik	0	0	0
1700003G18Rik	-0.0162497	-0.212247	0.192481
1700003H04Rik	0	0	0
1700003I22Rik	0	0	0
1700003L19Rik	0	0	0
1700003M02Rik	0.141346	-0.0837057	0.0725421
1700003M07Rik	-0.119102	-1.16268	-1.01316
1700003P14Rik	0	0	0
1700006A11Rik	0	0	0
1700006E09Rik	0	0	0
1700006F04Rik	0	0	0
1700006H21Rik	-0.00886651	-1.43165	-0.9232
1700007B14Rik	-0.0453567	-0.284254	0.859867
1700007F19Rik	0	0	0
1700007G11Rik	0.602826	0.205946	0.619822
1700007J10Rik	0.118734	0.193243	-0.12719
1700007K09Rik	-0.385893	-0.0463308	-0.20659
1700007K13Rik	-0.321054	0.297745	-0.176715
1700007L15Rik	0.684769	0.153767	0.672953
1700007P06Rik	0	0	0
1700008C04Rik	0	0	0
1700008J07Rik	-0.352496	-0.132351	-0.451509
1700008K24Rik	0	0	0
1700008O03Rik	0	-0.15381	-0.0722627
1700008P02Rik	0	0	0
1700009C05Rik	0	0	0
1700009J07Rik	0	0	0
1700009N14Rik	-0.00458925	0	0
1700010B08Rik	0	-0.297265	-0.0202325
1700010D01Rik	0	0	0
1700010I02Rik	0	0	0
1700010I14Rik	-0.491054	-0.794615	-0.0744295
1700010J16Rik	0	0	0
1700010K23Rik	0	0	0
1700011A15Rik	-0.00629181	0	0
1700011B04Rik	0	0	0.184673
1700011C11Rik	0	0	0
1700011E24Rik	0.0424446	-1.0956	-0.44125
1700011H14Rik	0	0	0
1700011I03Rik	0.0904637	0	0
1700011L22Rik	-0.00583924	-0.143803	0.124965
1700011M02Rik	0	0	0
1700012A03Rik	0	0	0
1700012B07Rik	0	0	0.0843333
1700012B09Rik	-0.991689	0.489094	0.399985
1700012C14Rik	0	-0.497412	-0.496946
1700012D01Rik	0.142261	-0.168859	-0.280263
1700012D14Rik	-1.11446	-1.42527	-0.679489
1700012D16Rik	-0.157518	0	-0.566607
1700012H19Rik	0	0	0
1700012I11Rik	0	0	0
1700012L04Rik	0.16246	0.17675	-0.475162
1700012P22Rik	0	0	0
1700013D24Rik	-0.170038	0	0.221212
1700013F07Rik	0.670897	1.38425	1.63967
1700013G24Rik	0	0	0.118248
1700013H16Rik	0	0	0
1700015E13Rik	0	0	0
1700015F17Rik	-0.0251403	0.40869	-0.783321
1700015G11Rik	0	0	0
1700016C15Rik	0	0.167392	0
1700016D06Rik	0	0.101595	0
1700016G22Rik	0	0	0
1700016H13Rik	0	0	0.356849
1700016K19Rik	0.245833	1.15011	1.19428
1700016L04Rik	0.168393	-0.153995	0
1700016L21Rik	0	0	0
1700016P04Rik	0	0	0
1700017B05Rik	-0.173595	-0.604791	-0.257395
1700017D01Rik	0	0	0
1700017G19Rik	0.036548	0	0
1700017J07Rik	0	0.257284	0
1700017L05Rik	0	0	0
1700017N19Rik	0	0	0
1700018A04Rik	-0.24745	0	0
1700018B08Rik	-0.168255	0	0
1700018B24Rik	0	0	0
1700018C11Rik	0	0	0
1700018F24Rik	0	0	0
1700018G05Rik	0	0	0
1700018L02Rik	-0.136416	0.211429	-0.0581765
1700019A02Rik	-0.0222466	-0.0206372	-0.407752
1700019B03Rik	0.0492687	0.189866	0.0982123
1700019B21Rik	0	0	0
1700019C18Rik	0	0	0
1700019D03Rik	-0.381523	-1.97808	-0.185757
1700019E08Rik	0	0	0
1700019G17Rik	-0.242259	-1.37179	-1.12852
1700019G24Rik	0	0	0
1700019L03Rik	-0.160606	-0.385148	-0.769473
1700019M22Rik	0	0	0
1700019N19Rik	-0.100802	-0.151936	0
1700019O17Rik	0	-0.0834694	0
1700020A23Rik	0	0	0
1700020D05Rik	-0.450917	-0.29044	0.0145387
1700020D14Rik	0	0	0
1700020G17Rik	0	0	0
1700020I14Rik	-0.389075	-0.185603	0.126917
1700020L24Rik	0.0622865	0.109874	-0.0611288
1700020M21Rik	0	0	0
1700020N01Rik	0	0	0
1700020N15Rik	0	0	0
1700020N18Rik	-0.166221	0	0
1700021F05Rik	0.173587	0.0228994	0.322504
1700021F07Rik	0	0	0
1700021K19Rik	-0.201446	0.22713	0.189952
1700021N21Rik	0	-0.154802	-0.154639
1700022A21Rik	0	0	0
1700022A22Rik	0	0	0
1700022E09Rik	0	0	0
1700022H01Rik	0	0	-0.0257358
1700022H16Rik	0	0.255303	0
1700022I11Rik	0	0	0
1700023C21Rik	0	0	0
1700023F02Rik	0.446536	0	0
1700023F06Rik	0.131641	0.46365	0.254965
1700024B18Rik	0	0	0
1700024F13Rik	-0.227387	0	-0.337752
1700024G13Rik	0	0	0
1700024I08Rik	0	0	0
1700024N05Rik	0	0	0
1700024P04Rik	0	0	0
1700024P16Rik	0.340066	0.451734	0.520625
1700025B11Rik	0	0	0
1700025C18Rik	0	0	0
1700025F22Rik	0	0	0
1700025F24Rik	0	0	0
1700025G04Rik	-0.167126	0.139299	0.267574
1700025J12Rik	0	0	0
1700025K24Rik	0	0	0
1700025M24Rik	0	0	0
1700025N23Rik	0.0843857	0.112925	-0.155127
1700026D08Rik	-0.141748	-0.0107436	0.0954321
1700026D11Rik	0	-0.164818	0
1700026F02Rik	0	0	0
1700026J14Rik	0	-0.0302399	0.152442
1700026L06Rik	0.142134	0.209857	-0.317719
1700027A15Rik	0	-0.238204	-0.237961
1700027F06Rik	0	-0.326954	-0.32663
1700027F09Rik	0	0	0
1700027H10Rik	0	0	0
1700027I24Rik	-0.12911	-0.372465	-0.527426
1700027J07Rik	0	0	0
1700028B04Rik	0	0.222722	0
1700028D13Rik	0	0	0
1700028E10Rik	0.0219168	-0.15461	0.0150856
1700028I16Rik	-0.157291	0.0881665	0.30783
1700028J19Rik	-0.0845713	-0.261548	-0.860133
1700028K03Rik	0	0	0
1700028M03Rik	0	0	0
1700028P14Rik	0.10043	0	0
1700028P15Rik	0	0	0
1700029B22Rik	0	0	0
1700029F12Rik	0	0	0
1700029H14Rik	-0.0724721	-0.266739	-0.26182
1700029I15Rik	-0.384314	0.362477	0.0780251
1700029J03Rik	0	0	0
1700029J07Rik	-0.0207788	-0.294956	-0.141898
1700029M20Rik	0	0	0
1700029N11Rik	0	0	0
1700029P11Rik	0	0	0
1700030A11Rik	0	0	0
1700030C10Rik	0.101105	0	0
1700030F04Rik	0	0	0
1700030F18Rik	0	0	0
1700030J22Rik	-0.470415	-0.47439	-0.28659
1700030K09Rik	0.0382768	-0.0931667	0.0377454
1700030L20Rik	0	0	0
1700030M09Rik	0	0	0
1700030N03Rik	0	0	0
1700030O20Rik	0	0	0
1700031A10Rik	0	0	0.182558
1700031F05Rik	0	0	0
1700031M16Rik	0	0	0
1700031P21Rik	0	0	0
1700034E13Rik	0	-0.280839	0
1700034G24Rik	0	0	0
1700034H15Rik	-0.122407	-0.10463	0.018193
1700034I23Rik	0	0	0
1700034J05Rik	-0.091775	-0.138545	0
1700034K08Rik	0	0	0.193356
1700034O15Rik	0	0	0
1700034P13Rik	0.0418873	-0.00939335	-0.0238111
1700036G14Rik	0	-0.251182	-0.250927
1700037C18Rik	-0.0922511	0.0372246	-0.0534571
1700037H04Rik	0.254662	0.683207	0.63221
1700039E15Rik	0	0	0
1700039E22Rik	0	0	0
1700040L02Rik	-0.0758141	0.290774	0
1700041A01Rik	0	0	0
1700041C23Rik	0	0	0
1700041M19Rik	0	0	0
1700042G07Rik	0	0	0
1700042G15Rik	0	0	0
1700042O10Rik	0	0	0
1700044C05Rik	0	0	0
1700044K03Rik	0	0	0
1700045H11Rik	-0.00925747	0	0
1700046C09Rik	0	0	0
1700047A11Rik	0	0.199907	0
1700047E10Rik	0	0	-0.239119
1700047G03Rik	0	0	0
1700047I17Rik2	0	0	0
1700047L14Rik	0	0	0
1700047M11Rik	0	0	0
1700048M11Rik	0.175759	0	0
1700048O20Rik	-1.31989	0.0950274	-0.865318
1700049E15Rik	0	0	0
1700049E22Rik	0	0	-0.265391
1700049G17Rik	-0.328169	-0.598949	-0.452381
1700049L16Rik	0	0	0
1700051A21Rik	0.127185	0	0
1700052I22Rik	0	0	0
1700052K11Rik	-0.00708446	-0.492963	0.00963427
1700054A03Rik	0	0	0
1700054K19Rik	0	0	0
1700054M17Rik	0	0	0
1700055C04Rik	0	0	0
1700056E22Rik	0.0542206	-0.149229	-0.247434
1700057G04Rik	0.0833614	0.457096	0.55068
1700057H15Rik	0	0	0
1700057H21Rik	0	0	0
1700060C16Rik	0	0	0
1700060C20Rik	0	0	0
1700061F12Rik	0	0	0
1700061G19Rik	0	0	0
1700061I17Rik	0	0	0
1700061J23Rik	0	0	0
1700063A18Rik	0	0	0
1700063D05Rik	-0.129894	0	0
1700063O14Rik	0	0	0
1700064J06Rik	0	0	0
1700064M15Rik	-0.39032	0.192653	-0.376461
1700065D16Rik	-0.450525	-0.182991	-0.1828
1700065I16Rik	0	0	0
1700065J11Rik	0	0	0
1700065J18Rik	0	0	0
1700065L07Rik	0	0	0
1700065O20Rik	0	0	0
1700066B17Rik	0	0	-0.0320218
1700066B19Rik	-0.0393771	-0.00574624	0
1700066J03Rik	-0.175623	0.237049	0
1700066M21Rik	-0.369084	-0.770581	-0.436126
1700066N21Rik	0	0	0
1700066O22Rik	0	0	-0.146213
1700067G17Rik	0	0	0
1700067K01Rik	-0.0181377	-0.58309	-0.711873
1700067P10Rik	0	0	0
1700069L16Rik	0	0	0
1700069P05Rik	0	0	0
1700071K01Rik	0	0	0
1700071M16Rik	0	0	0
1700072B07Rik	0	0	0
1700072I22Rik	0	0	0
1700072O05Rik	-0.137498	0	0
1700073E17Rik	0	-0.0318034	0
1700074H08Rik	-0.158987	0	-0.0312243
1700074P13Rik	0	0	0
1700080E11Rik	0	0	0
1700080N15Rik	0	0	0
1700080O16Rik	0	0	0
1700081H04Rik	0	0	0
1700084C01Rik	0	0	0.0860389
1700084D21Rik	0	0	0
1700084E18Rik	0.20716	0.800885	0.595773
1700084F23Rik	0	0	0
1700084J12Rik	0.365813	-0.442146	-0.191456
1700084M14Rik	0	0	0
1700085C21Rik	0	0	0
1700086L19Rik	-0.00548174	0	0
1700086O06Rik	0.124502	0.0167204	-0.170078
1700088E04Rik	-0.042608	-0.00645306	0.0327541
1700091H14Rik	0	0	0
1700092C02Rik	0	0	0
1700092C10Rik	0.15053	0	0
1700092E19Rik	0	0	0
1700092K14Rik	0	0	-0.332538
1700092M07Rik	-0.845483	0.700374	-0.303066
1700093K21Rik	-0.00402762	0.0742065	0.0856348
1700094D03Rik	0.0422614	0.0434801	-0.338199
1700094J05Rik	0.0674778	-0.141193	0.122682
1700094M24Rik	0	0	0
1700095A21Rik	0	0	0
1700095B10Rik	0	0	0
1700095J12Rik	0	0	0
1700096J18Rik	0	0	0
1700096K18Rik	0.113755	0.0974171	-0.332878
1700096P03Rik	-0.205209	0	-0.303707
1700097N02Rik	0	0	0
1700099I09Rik	0	-0.158115	0
1700100I10Rik	0	0	0
1700100L14Rik	0	0	0
1700101E01Rik	-0.587109	-0.15097	-0.286842
1700101I11Rik	-0.198089	0.124358	0.0841122
1700101O22Rik	0	0	0
1700102H20Rik	0.262394	1.11957	-0.375775
1700102P08Rik	-0.363703	-0.200942	-0.693849
1700104L18Rik	0	0	0
1700105P06Rik	-0.638447	-0.728158	-0.229407
1700106J16Rik	0	-0.484202	-0.667203
1700108F19Rik	0	0	0.140056
1700108J01Rik	0	0	0
1700109G14Rik	0.277628	-0.172229	0
1700109G15Rik	0	0	0
1700109H08Rik	-1.00712	-0.825739	-0.725377
1700109I08Rik	0	0	0
1700109K24Rik	-0.0858077	-0.129671	0
1700110C19Rik	-0.244928	-0.493707	-0.927145
1700110I01Rik	0	0	0
1700110I07Rik	0	0	-0.190348
1700110K17Rik	0	-0.195077	0
1700111N16Rik	0	0	0
1700112E06Rik	-0.264891	1.02375	0.169756
1700112H15Rik	0.0963667	-0.337445	-0.022966
1700112J05Rik	0	0	0
1700112J16Rik	-0.00886005	-0.466525	-0.258159
1700113A16Rik	0.118579	-0.922898	-0.238515
1700113B09Rik	0	0	0
1700113H08Rik	0	0	0.0920589
1700116B05Rik	-0.215797	-0.31916	-0.318843
1700119H24Rik	0	0	0
1700120C14Rik	0.291324	0	0.140607
1700120E14Rik	0	0	0
1700120G07Rik	0	0	0
1700120K04Rik	-0.295812	-0.838752	-1.04601
1700121L16Rik	0	0	0
1700121N20Rik	0	0	0
1700122C19Rik	-0.115833	0	0
1700122O11Rik	0	0	0
1700123I01Rik	-0.0585405	0.15608	0
1700123J17Rik	0	0	0
1700123K08Rik	-0.089225	0	0.117054
1700123L14Rik	0	-0.0843264	-0.0842357
1700123M08Rik	0.0103237	-0.211804	-0.0732294
1700123O12Rik	-0.160405	0	0
1700123O20Rik	-0.0499148	-0.459007	-0.10093
1700123O21Rik	0	-0.684778	-0.38227
1700124L16Rik	-1.75732	-0.375444	-0.407164
1700125G02Rik	0	0	0
1700125G22Rik	-0.208095	0.239423	0.107582
1700125H03Rik	0	0	0
1700125H20Rik	0.32967	0.141614	-0.261489
1700126H18Rik	0	0	0
1700128A07Rik	0	0	0
1700128F08Rik	0	0	0
1700129C05Rik	0	0	0
1810006J02Rik	0	0	0
1810007C17Rik	0	0.723126	0
1810007D17Rik	0	0	0
1810008I18Rik	0.337298	0.847675	0.990071
1810009A15Rik	-0.343335	0.427272	-0.00253813
1810009J06Rik	0	0	0
1810010D01Rik	-0.280151	-0.388998	0.100168
1810010H24Rik	0.578162	-1.66926	0.20265
1810011H11Rik	0	0	0
1810011O10Rik	0.608319	0.535561	-0.711046
1810012K16Rik	-0.160231	-0.546539	-0.232205
1810013A23Rik	-0.364423	-0.393666	-0.444866
1810013L24Rik	-0.029764	0.422058	0.328896
1810014B01Rik	0.197264	0.129852	-0.142944
1810018F18Rik	0	0	0
1810019D21Rik	0.0984274	-0.234052	-0.180605
1810020O05Rik	0.0837481	0	0
1810021B22Rik	0.0166848	0.985657	0.23864
1810022K09Rik	0.0890051	0.466798	0.351119
1810024B03Rik	-0.016083	0.0342467	0.165756
1810026B05Rik	-0.478822	-0.23192	-0.352114
1810026J23Rik	-0.0946657	-0.379057	-0.264686
1810030O07Rik	-0.0634808	0.432461	0.324017
1810032O08Rik	-0.0855288	0.903748	0.590454
1810034E14Rik	-0.134343	0.0606608	-0.0972084
1810037I17Rik	0.228706	0.372759	0.426854
1810041H14Rik	-0.316616	0.105292	0
1810041L15Rik	0.378556	-0.606326	-0.426331
1810043G02Rik	-0.4643	-0.507212	-0.6402
1810043H04Rik	0.0915149	-0.233039	0.176249
1810044D09Rik	0.22541	1.23698	0.645003
1810046K07Rik	-0.0713242	0	0
1810053B23Rik	0	0	0
1810055G02Rik	-0.192137	-0.809475	-0.140396
1810058I24Rik	0.214436	0.152931	0.207097
1810062G17Rik	-0.241929	0.210534	1.0276
1810062O18Rik	-0.263483	-0.298416	-0.626973
1810063I02Rik	-0.314737	0.418247	0
1810064F22Rik	0	0	0.0544189
1810065E05Rik	0	0	0
2010001A14Rik	0.891399	-0.459918	0.332197
2010001E11Rik	0	0	0.0443828
2010003K11Rik	0.0753573	0	0
2010005H15Rik	0	0	0
2010009K17Rik	0	0	-0.238346
2010010A06Rik	0	0	0
2010012O05Rik	-0.175484	0.290696	0.331393
2010016I18Rik	-0.174561	-0.527193	-0.399873
2010106C02Rik	0	0	0
2010106E10Rik	0	0	0
2010107E04Rik	-0.0769773	0.137881	0.178128
2010107G12Rik	-0.245763	-0.190644	-0.134022
2010107G23Rik	0.502296	0.956251	0.423668
2010109A12Rik	-0.530582	0.170856	0.403768
2010109I03Rik	0	0.238858	-0.0762349
2010111I01Rik	-0.590392	-0.0170625	0.44835
2010204K13Rik	0.203442	0.467634	0.91668
2010300C02Rik	-0.291296	-1.53144	-0.801952
2010308F09Rik	-0.0079517	-0.196898	-0.0251864
2010310C07Rik	-0.0175791	-0.246429	-0.270591
2010315B03Rik	-0.500228	-0.410798	-0.123168
2010320M18Rik	-0.182306	0.102836	-0.370782
2200002D01Rik	-0.587924	0.576738	0.680592
2200002J24Rik	0	0	0.195431
2210010C04Rik	0	0	0
2210011C24Rik	-0.10198	0.266865	0.475351
2210013O21Rik	0.102489	0.196892	0.559361
2210015D19Rik	0.177219	-0.0722109	0.153455
2210016F16Rik	-0.0730031	-0.634495	0.0124683
2210016L21Rik	-0.0172165	0.0929525	-0.0157105
2210018M11Rik	-0.580098	-0.401713	-0.455166
2210019I11Rik	0	0	0
2210039B01Rik	0.0843745	-0.0131546	0.11792
2210404E10Rik	0	0	0.203871
2210404O09Rik	-0.00590021	0.433552	-0.11096
2210406O10Rik	0.0153112	0.0638797	-0.0111474
2210407C18Rik	0	0	0
2210408F21Rik	0.105178	-0.868621	-0.772316
2210408I21Rik	-0.0623774	-0.477686	-0.414756
2210409D07Rik	0	0	0
2210409E12Rik	-0.614985	0	0.304188
2210414B05Rik	0	0	0
2210416O15Rik	-0.415165	-0.268741	-0.673099
2210417A02Rik	0	0	0
2210420H20Rik	0	0	0
2300002M23Rik	0	0	0.0988318
2300003K06Rik	0	0	0
2300005B03Rik	0.490151	-0.0266302	-0.287682
2300009A05Rik	0.358794	0.957424	0.807916
2310001H17Rik	0.162681	1.17238	0.572553
2310001K24Rik	0.184386	0	0
2310002D06Rik	-0.336832	-0.265182	0
2310002F09Rik	0	-0.164025	-0.0567109
2310002L09Rik	0	0	0
2310003N18Rik	-0.184497	0.487886	0.471366
2310005A03Rik	0	0	0
2310005E17Rik	0	0	0
2310007B03Rik	0	0.0552127	0
2310008N11Rik	0	0.218324	0
2310009A05Rik	-0.211102	-0.28496	0.310506
2310009B15Rik	0.506933	0.0135506	0.691077
2310010G23Rik	0.281235	-0.798786	0.25043
2310010J17Rik	-0.452783	-1.07638	0.0383204
2310011J03Rik	0.0667158	-0.108384	0.385245
2310015A10Rik	-0.313697	-0.377297	-0.133682
2310015D24Rik	0.0306221	0	0
2310016D03Rik	0	0	0
2310020H05Rik	-0.128336	-0.192534	-0.651171
2310022A10Rik	-0.409309	-0.0381789	-0.190955
2310022B05Rik	-0.140004	1.0161	1.27731
2310030A07Rik	0	0	-0.223867
2310030G06Rik	0.0856065	2.5429	1.39246
2310033P09Rik	-0.284187	-0.521358	-0.0241953
2310034C09Rik	0	0	0
2310034G01Rik	0.184748	0.100207	-0.176249
2310034O05Rik	0	-0.0124119	0
2310035C23Rik	-0.233772	-0.38576	-0.193004
2310036O22Rik	0.0536186	-0.322429	0.0579
2310039H08Rik	0.0721984	0.186658	0.0626839
2310039L15Rik	0.37007	0.150368	0
2310040G24Rik	0.12029	-0.422043	0.177637
2310043L19Rik	0	0	0
2310043O21Rik	0	0	0
2310045N01Rik	0.163391	0.0384715	0.201758
2310045n01rik-mef2b	0	-0.0924468	-0.0121981
2310047M10Rik	0.0959706	0.00937235	-0.0752571
2310050C09Rik	0	0	0
2310057J18Rik	0	0	0
2310057M21Rik	-0.218067	-0.657528	-0.0570151
2310057N15Rik	0	0	0
2310061I04Rik	0.166518	0.397188	-0.0331741
2310061N02Rik	0	0	0
2310065F04Rik	0	0	0
2310067B10Rik	-0.469608	-0.486594	-0.900246
2310068J16Rik	0.80581	0.0247019	0.170065
2310069B03Rik	0	0.0597695	0.195332
2310069G16Rik	-0.788289	0	-0.822709
2310075C17Rik	0	0	0
2310079G19Rik	0	0	0
2310081J21Rik	0	0	-0.130449
2400006E01Rik	0	0	0
2410002F23Rik	-0.179552	-0.495499	0.221214
2410003L11Rik	0	0	0
2410004B18Rik	0.0307061	0.12791	0.40034
2410004I01Rik	-0.189079	0	0
2410004P03Rik	0.0906512	0.0607858	-0.0201714
2410006H16Rik	0.865812	0.849091	0.995772
2410012E07Rik	-0.135467	0	-0.0138106
2410015M20Rik	0.177972	-0.218609	0.0963944
2410016O06Rik	-0.189825	-0.448889	0.210363
2410017I17Rik	0	-0.0946971	-0.0945956
2410018L13Rik	0.122939	-0.189348	-0.196903
2410021H03Rik	0	-0.182088	0
2410089E03Rik	-0.426098	0.147285	0.176098
2410124H12Rik	0	0	0
2410127L17Rik	-0.0184309	-0.461905	-0.120972
2410131K14Rik	-0.24993	-0.372498	-0.231884
2410137M14Rik	-0.107316	-0.161573	-0.161404
2410141K09Rik	0	0	0
2500002B13Rik	0.323415	0.520608	0.659015
2500004C02Rik	-0.162379	-0.0485025	0.57067
2510002D24Rik	0.370597	0.335424	0.433863
2510003B16Rik	0.0461816	0.10316	-0.226624
2510009E07Rik	-0.709375	-1.27552	-0.797089
2510039O18Rik	-0.24947	-0.38645	-0.253477
2610001J05Rik	0.0689632	0.309975	0.198931
2610002M06Rik	-0.222187	0.456079	0.22832
2610005L07Rik	-0.0860536	-0.370453	-0.111441
2610008E11Rik	-0.0481788	0.0566443	0.0916252
2610015P09Rik	0.14498	0.188983	0.0849366
2610016A17Rik	0	0	0
2610020C07Rik	-0.0259511	-0.0688637	-0.139987
2610020H08Rik	-0.431744	-0.753327	-0.314761
2610027K06Rik	-0.191048	-0.282428	-0.180127
2610028E06Rik	0.0252586	0	0
2610028H24Rik	-0.0536512	0	0
2610035D17Rik	-0.718917	0.0440135	0.529386
2610035F20Rik	-0.247285	0.588982	-0.78478
2610037D02Rik	0.0464271	-0.624641	-0.677743
2610042L04Rik	-0.00604506	-0.0763961	0.0661851
2610044O15Rik8	-0.0440365	0.0514998	0.162509
2610100L16Rik	-0.985608	-1.32432	-0.96268
2610203C22Rik	-0.0251033	0.259978	-0.006513
2610206C17Rik	0.0464419	0.147092	-0.0300396
2610301B20Rik	-0.658634	-0.547341	-0.433515
2610305D13Rik	-0.648974	-0.56691	-0.972805
2610306M01Rik	0.250905	-0.508014	0.00979814
2610307P16Rik	-0.721127	-1.01754	-0.421795
2610316D01Rik	-0.10048	-0.638218	-0.78862
2610318N02Rik	0.536798	0.814898	0.399987
2610507B11Rik	-0.145068	-0.651455	-0.125838
2610507I01Rik	0.164944	0.135778	0.0252487
2610524H06Rik	-0.215925	-0.905087	-0.378824
2610528A11Rik	-0.262418	0.389493	-0.183255
2610528J11Rik	0	0	0
2700029M09Rik	0.0466283	0.143503	0.230647
2700038G22Rik	-0.400472	-0.280039	0.000818637
2700046A07Rik	-0.0444865	0	0
2700046G09Rik	-0.18537	0.0958317	-0.035507
2700049A03Rik	-0.307037	0.363524	0.0509945
2700054A10Rik	0.0758088	0.563704	0.521923
2700060E02Rik	0.0401462	0.221871	0.0453707
2700062C07Rik	0.0818973	0.207922	0.312603
2700069I18Rik	-0.0426137	-0.290499	-0.183672
2700070H01Rik	-0.00336253	-0.0823077	0
2700081O15Rik	-1.44278	-1.22447	-0.931941
2700089I24Rik	0.0437849	-0.0787564	0.133392
2700094K13Rik	0.149954	1.34321	0.566684
2700097O09Rik	-0.0150831	0.0799924	-0.00746147
2700099C18Rik	0.0514874	0.612583	0.319715
2810001G20Rik	-0.228245	-0.383759	0.101918
2810002D19Rik	-0.296376	-0.180248	-0.010855
2810004N23Rik	-0.0867799	-0.256005	0.36804
2810006K23Rik	-0.203006	-0.504487	-0.378101
2810013P06Rik	-0.0277378	0.288023	0.417906
2810021J22Rik	0.0452997	-0.3936	0.0985411
2810025M15Rik	0.661163	2.02959	1.97696
2810029C07Rik	-0.455982	-0.0681269	0.180831
2810032G03Rik	-0.559569	-0.941712	0.113056
2810047C21Rik1	0.32605	0.287073	0.0478747
2810049E08Rik	-0.233515	-0.654397	0.0471138
2810403A07Rik	-0.155858	-0.0646815	-0.17683
2810403D21Rik	0.199742	0.251745	0.540862
2810404M03Rik	0	0	0
2810405F15Rik	0	0	0
2810408A11Rik	-0.155855	0.322853	0.696519
2810408I11Rik	0.299828	0.869061	0.323036
2810410L24Rik	0.14802	0.851615	0.328696
2810417H13Rik	0.112063	1.04281	0.277091
2810428I15Rik	0.174396	-0.018352	0.361476
2810429I04Rik	0.136107	1.045	0.733146
2810433D01Rik	-0.178921	0.985172	0.89292
2810442N19Rik	0	-0.152564	-0.152403
2810454H06Rik	-0.177173	0.206918	-0.0846997
2810459M11Rik	-0.628176	-1.70378	-2.03711
2810468N07Rik	0.184204	-0.0751458	-0.502656
2810471M01Rik	0.0554511	0.0377145	0.211919
2810474O19Rik	-0.455462	-0.0539202	-0.681528
2900005J15Rik	0.0708958	0.361523	0.225329
2900008C10Rik	-0.326074	-0.33146	-0.77002
2900009J06Rik	0.355666	0.555506	-0.0802217
2900011O08Rik	0.515546	0.22915	1.18044
2900026A02Rik	0.424447	1.72298	1.85313
2900041M22Rik	-0.0699773	0.0956702	0.0919926
2900052N01Rik	0	-0.0561048	0
2900055J20Rik	-0.634167	-0.52611	-0.0833793
2900057B20Rik	0.0862286	0	0
2900060B14Rik	-0.188872	-0.497254	-0.585234
2900076A07Rik	-0.501585	-0.869726	-1.12564
2900079G21Rik	0	0	0
2900092C05Rik	0	-0.164086	0
2900092D14Rik	-2.21158	-3.38785	-2.49621
2900097C17Rik	-0.464791	-0.673754	-0.26414
3000002C10Rik	-0.127818	-0.0866782	0.394379
3010001F23Rik	0.284242	-0.40901	-0.080165
3010026O09Rik	0.168098	0.137498	0.125407
3100003L05Rik	-0.0212873	-0.207118	0
3110001I22Rik	-0.679134	-0.20284	-0.0506031
3110002H16Rik	0.459216	0.270404	0.314302
3110009E18Rik	-0.0204113	-0.5226	0.0306765
3110009F21Rik	0	0	0
3110015C05Rik	0	0	0
3110021A11Rik	-0.407731	0.0182455	-0.288138
3110021N24Rik	0.0276171	-0.34156	-0.280688
3110035E14Rik	-0.422489	-0.0517936	0.0895496
3110039I08Rik	-0.602937	-0.266579	0.565766
3110039M20Rik	0.0690222	0.594045	0.466915
3110040N11Rik	0.0524107	0.000574086	-0.215224
3110043O21Rik	-0.142779	-0.539463	0.0050643
3110045C21Rik	0.040169	0.0749184	-0.0302587
3110052M02Rik	0.00248459	-0.321972	-0.0199415
3110056K07Rik	-0.490804	-0.479242	-0.202329
3110057O12Rik	0.391146	0.220225	0.137479
3110062M04Rik	-0.110752	-0.478992	-0.0365052
3110070M22Rik	-0.445416	-1.59169	-0.775827
3110079O15Rik	0.345845	0	0
3110082I17Rik	0.0653156	-0.214505	0.281136
3110082J24Rik	-0.624689	-1.27657	-1.08009
3110099E03Rik	-0.131857	0.0530743	0.0154492
3200001D21Rik	0	0	0
3300002I08Rik	-0.273625	-0.253314	0.200382
3300002P13Rik	0	-0.129444	-0.129307
3300005D01Rik	0.134484	0.19392	0.0963689
3425401B19Rik	-0.0343341	0.0404538	0.0369395
3632451O06Rik	-0.568822	-0.989189	-0.987073
3632454L22Rik	0	0	0
3830403N18Rik	0	0	0
3830406C13Rik	-0.196081	0.0397684	-0.24799
3830408C21Rik	0.0400881	-0.499697	-0.248819
3830417A13Rik	0	0	0
3830432H09Rik	0.102957	-0.0699139	-0.226099
3930402G23Rik	-0.997769	-0.634138	-0.235852
4430402I18Rik	-0.00533757	-0.387671	-0.144997
4631405J19Rik	0	0	0.193797
4632404H12Rik	-0.664941	-0.480756	-0.376347
4632415L05Rik	-0.19227	-0.277062	0.509407
4632427E13Rik	-0.596238	-0.746807	-0.921644
4632428C04Rik	0.0642796	0.038614	-0.0703646
4632428N05Rik	-0.0359481	0.569724	0.432596
4732416N19Rik	-0.965165	-0.0943122	-0.323109
4732456N10Rik	0	0	0
4732471J01Rik	-0.103781	-0.475823	0.108538
4732490B19Rik	0	-0.0592285	-0.0591642
4732491K20Rik	-0.148046	0.507369	0.31694
4831407H17Rik	0.0740589	-0.119404	0
4831440E17Rik	-0.0251922	0.0430785	-0.077709
4833411C07Rik	0	0	0
4833412C05Rik	-0.086346	0.226718	0.113312
4833415N18Rik	0	0	0
4833417C18Rik	-0.0830039	0.860201	0.219286
4833418N02Rik	-0.126871	-0.518928	-0.623648
4833419F23Rik	-0.323195	-0.15634	-0.625334
4833420G17Rik	-0.164157	0.351147	-0.0401924
4833422C13Rik	-0.0339112	-0.0794041	-0.0516627
4833422M21Rik	-0.134709	-0.201878	-0.111049
4833423E24Rik	0	0	0
4833427F10Rik	0	0	-0.0127729
4833427G06Rik	0.0529719	-0.320051	0.155984
4833428L15Rik	0	0	0
4833439L19Rik	-0.172148	-0.503116	0.111777
4921501E09Rik	0	0	0
4921504A21Rik	-0.382192	-0.459022	-0.467223
4921504E06Rik	-0.00294317	0.114459	0.0623386
4921506M07Rik	-0.0637289	0.0871961	0.163064
4921507L20Rik	0.0570997	0.16208	0
4921507P07Rik	0.10119	0.644352	0.34243
4921508D12Rik	0	0	0
4921509C19Rik	0	-0.0541132	0
4921509O07Rik	0	0.0508802	0
4921511C10Rik	0	0.0881211	0
4921511C20Rik	0	0	0
4921511H03Rik	0	0	0
4921511I17Rik	0.0657988	0	0
4921511M17Rik	0	0	0
4921513I03Rik	0.0507728	0	0.266171
4921515E04Rik	0	0	0
4921517D22Rik	0	0	0
4921518K17Rik	0	0	0
4921524J17Rik	-0.275468	-0.191985	0.0714754
4921524L21Rik	0	0	0.0837797
4921525O09Rik	0	0	-0.0444559
4921529L05Rik	0	0	0
4921530L21Rik	0	0	0
4921531C22Rik	-0.264421	-0.181599	-0.0383256
4921531P14Rik	0	0	0
4921533I20Rik	0	0	0
4921534H16Rik	0	0	0
4921536K21Rik	0.20077	0.0493545	-0.0686401
4921539E11Rik	0	0	0
4922502D21Rik	0	0	0
4922502H24Rik	0	0	0
4922502N22Rik	0	0	0
4930401C15Rik	0	0	0
4930401O10Rik	0	0	0
4930401O12Rik	0	0	0
4930402F06Rik	0	0	0.25536
4930402F11Rik	0	0	0
4930402H24Rik	-0.132038	-0.0406225	0.117779
4930402K13Rik	0	0	0
4930404A05Rik	0	0	0
4930404H11Rik	-0.12047	0	0
4930404I05Rik	0	0	0.124965
4930404N11Rik	0.197961	0.0581746	0.117178
4930405A10Rik	0	0	0
4930405A21Rik	0.215604	0.0511445	-0.16578
4930405D11Rik	0	0	0
4930405J17Rik	0	0	0
4930405L22Rik	0	0	0
4930405O22Rik	-0.428928	-1.13071	-0.574373
4930406D18Rik	0	0	0
4930407G08Rik	0	0	-0.197484
4930407I10Rik	0	0	0.0270643
4930407I19Rik	0	0	0
4930412B13Rik	0	0	0
4930412C18Rik	0.0666737	0.128117	-0.075736
4930412O13Rik	0.0867466	-0.036158	0.0618703
4930413E15Rik	0	0	0
4930413F20Rik	-0.0853515	0	0
4930413G21Rik	-0.126973	0.193487	-0.19752
4930413M19Rik	0	0	0
4930414N06Rik	0	0	0
4930415F15Rik	0	-0.460617	0.160297
4930415L06Rik	0	0	0
4930415O20Rik	0	0.217608	-0.625483
4930417O13Rik	0	0.325294	-0.129193
4930417O22Rik	0	0	0
4930419G24Rik	0	0	0
4930423M02Rik	0	0	0
4930425K10Rik	0	0	0
4930425L21Rik	0	0	0
4930425O10Rik	0	0	0
4930426D05Rik	0	0	0
4930426L09Rik	0.0595089	-0.465331	-0.190965
4930427A07Rik	-0.532433	-0.0104733	-0.168323
4930428D20Rik	0	0	0
4930428E07Rik	0	0	0
4930428G15Rik	-0.11473	0	0
4930428O21Rik	0	0	0
4930429B21Rik	-0.223769	-0.548404	-0.352741
4930429D17Rik	-0.252578	-0.245169	0.197501
4930429F11Rik	0	0	0
4930429F24Rik	0.196944	-0.0372481	-0.183914
4930430A15Rik	0	0	0
4930430F08Rik	0.0917126	0.521171	0.340592
4930430F21Rik	0.108132	0	-0.172944
4930430J02Rik	0	0	0
4930431F12Rik	0.0776925	0	0
4930431P03Rik	-0.12071	0.140528	0.613659
4930432J09Rik	0	0	0
4930432K21Rik	-0.524376	-0.0194907	-0.530417
4930432M17Rik	0	0	0
4930433B08Rik	0	0	0
4930433I11Rik	0	0	0
4930433N12Rik	0	-0.103227	0
4930434J06Rik	0	0	0
4930435E12Rik	0	0	0
4930438E09Rik	0	0	0
4930440C22Rik	-0.060299	0	0
4930440I19Rik	0	0	0
4930441H08Rik	0	0	0
4930441J16Rik	0	0	0
4930442J19Rik	0	0	0
4930442L01Rik	0	0	0
4930443O20Rik	0.061245	-0.0990098	0.166906
4930444F02Rik	-0.0227534	0	0.0300665
4930444G20Rik	0	0	0
4930444M15Rik	0	0	0.0750149
4930444P10Rik	-0.312361	-0.0817428	-0.221267
4930445N18Rik	0.0984579	-0.300294	0.137342
4930447A16Rik	0.14614	0	0
4930447C04Rik	0.0377207	0.151398	0.153652
4930447F24Rik	1.41636	-0.112039	0.755656
4930447J18Rik	0	0	0
4930447K03Rik	-0.33188	-0.554237	-0.554744
4930447M23Rik	0	0	0
4930447N08Rik	0	0.110646	0
4930448C13Rik	0.107874	0	0
4930448F12Rik	0	0	0
4930448H16Rik	0	0	0
4930448I06Rik	0	0	0
4930448I18Rik	0	0	0
4930448K20Rik	0	0	-0.0995707
4930449E01Rik	0	0	0
4930449E18Rik	0	0	0
4930449I24Rik	0	0	0
4930451G09Rik	-0.033329	0.363985	0.324215
4930451I11Rik	0	0	0
4930452A19Rik	0.145433	-0.231116	-0.760604
4930452B06Rik	-0.267873	0.0823718	-0.207584
4930452G13Rik	0	0	0
4930452N14Rik	0	0	0
4930453H23Rik	0	0	0
4930453L07Rik	0	0	0
4930453N24Rik	-0.211218	-0.144633	0.306641
4930455B14Rik	0	0	0
4930455C13Rik	-0.173478	0.0650722	-0.144433
4930455D15Rik	-0.00362262	-0.0955194	0.0769135
4930455F16Rik	0	0	-0.149774
4930455G09Rik	0	0	0
4930455H04Rik	0	0	0
4930455J16Rik	0	0	0
4930456L15Rik	0	0	0
4930459C07Rik	0	0.106139	0
4930459L07Rik	0	0	0
4930461G14Rik	-0.42282	1.20133	0.117067
4930463O16Rik	-0.0407951	0.05598	0
4930465K10Rik	-0.135176	0.36968	0.139732
4930465M20Rik	0	0	0
4930467D21Rik	0.0272384	0.0861504	0.0420085
4930467E23Rik	0	0	0
4930467K11Rik	0	0	0
4930469G21Rik	0.177839	-0.0142182	0
4930470H14Rik	0	0	0
4930470O06Rik	0	0	0
4930470P17Rik	0	0	0
4930471C04Rik	0	0	-0.161404
4930471G03Rik	0	0	0
4930471M09Rik	-0.00517427	-0.0123605	-0.12708
4930473A02Rik	0.180449	-0.0186425	0.461343
4930473O22Rik	0	0	0
4930474G06Rik	0.0335092	0	0
4930474H20Rik	0.0597848	0	0
4930474M22Rik	0	0	0
4930474N05Rik	0	0	0
4930474N09Rik	0.0747953	0.108834	-0.132555
4930477N07Rik	0	0	0
4930478L05Rik	0.047239	0	0
4930478P22Rik	0	0	0
4930479D17Rik	-0.00756631	0.583126	-0.337957
4930480E11Rik	0	0	0
4930480G23Rik	0.069982	0	-0.112807
4930480K15Rik	0	0	0
4930480K23Rik	0.040876	-0.176762	-0.039515
4930480M12Rik	0	0	0
4930481A15Rik	-0.0438388	0.0601333	0.113362
4930482G09Rik	0	0	0
4930483J18Rik	0.29725	0.11667	0.184353
4930483K19Rik	0	0	0
4930483O08Rik	0.0850904	0	-0.136732
4930484H19Rik	0	0.0623272	-0.0108695
4930486F22Rik	-0.307183	0	0
4930486I03Rik	0	0	0
4930486L24Rik	0.125854	0.417453	0.402998
4930487D11Rik	0	0	0
4930487H11Rik	-0.103845	0	0
4930488B22Rik	0	0	0
4930488L21Rik	0.0430021	0	0
4930500F04Rik	0	0	0
4930500L23Rik	0	0	0
4930502A04Rik	0	0	0
4930502E09Rik	-0.12017	0.166136	0.120342
4930502E18Rik	-0.146579	0.385586	0.333999
4930503B20Rik	-0.0106501	-0.585641	-0.144682
4930503E14Rik	0	-0.110397	0
4930503E24Rik	0	0	-0.10677
4930503F20Rik	0	0	0
4930503H13Rik	0	0	0
4930503L19Rik	-0.0788857	0.070801	0.110356
4930503O07Rik	0	0	0
4930504C09Rik	0	0	0
4930504O13Rik	0	0.206758	0
4930505A04Rik	0.150889	-0.151624	-0.0496835
4930505G20Rik	0	0	0
4930505K13Rik	0	0	0
4930505K14Rik	0	0	0
4930506A18Rik	0	0	0
4930506C21Rik	-0.0954359	0.282983	0.392368
4930507D05Rik	-0.284943	0.275004	-0.290143
4930507D10Rik	0	0	0.10677
4930509E16Rik	-0.147849	-0.0116026	0
4930509J09Rik	0	0	0
4930509K18Rik	0	0	0
4930511A02Rik	0	0	0
4930511A08Rik	0.0966957	0.16303	0.0934321
4930511E03Rik	0.0398911	0	0
4930511M06Rik	0.0260682	-0.0890443	-0.125923
4930512B01Rik	0.121777	0	0
4930512J16Rik	0.0477639	0	0
4930512M02Rik	0	0	0
4930513D17Rik	0	-0.118069	0.102483
4930513N10Rik	0.00685537	-0.150924	0.116774
4930513O06Rik	0	0	0
4930515B02Rik	0	0	0
4930515G01Rik	0.0698038	-0.320648	-0.215769
4930515G16Rik	0	0	0
4930515L03Rik	0	0	0
4930515L19Rik	0	0	0
4930517E11Rik	0	-0.0980901	0
4930517M08Rik	0	0	0
4930518J21Rik	0	0	0
4930518P08Rik	0	0	0
4930519D14Rik	0	0	0
4930519F09Rik	0	0	0
4930519F16Rik	0	0	-0.121436
4930519F24Rik	0	0	0
4930519G04Rik	0	0	0.0612322
4930519H02Rik	0	0	0
4930519K11Rik	0.182519	0	0
4930520O04Rik	0.172101	-0.0429164	0.6227
4930520P13Rik	0	-0.444324	0.167098
4930521E06Rik	0	0	0
4930522H14Rik	0	0	0
4930522O17Rik	0	0	0
4930523C07Rik	-1.96763	-1.62698	-1.46349
4930523O13Rik	0	0	0
4930524B15Rik	-0.0483723	0	0
4930524B17Rik	0	0	0
4930524C18Rik	0	0	0
4930524N10Rik	0	0	0
4930524O05Rik	0	0	0
4930524O08Rik	0	0	0.0854056
4930525C09Rik	0	0	0
4930525D18Rik	0.181053	-0.274388	-0.0356026
4930525G20Rik	-0.063767	0.0438335	-0.0486269
4930526H09Rik	-0.079571	0.108656	0
4930526I15Rik	-0.294709	-0.720479	-0.727866
4930526L06Rik	0	0	0
4930527F14Rik	0	0	-0.355021
4930527G23Rik	0	0	0
4930528A17Rik	-0.0632543	-0.269345	-0.162018
4930528D03Rik	0	-0.114679	0
4930528G23Rik	0	0	0
4930528H21Rik	0	0	0
4930528P14Rik	0	0	0
4930529C04Rik	-0.00169328	0	0
4930529K09Rik	0	0	0
4930529L06Rik	0	0	0
4930532I03Rik	0	0	0
4930532M18Rik	0	0	0
4930533B01Rik	0	0.123732	0
4930533N22Rik	0	0	-0.0936359
4930533P14Rik	0	0	0
4930538K18Rik	0.188315	-0.0246317	0.184892
4930539C22Rik	0	0	0
4930539E08Rik	0.0387773	0.137885	0.107084
4930539J05Rik	-0.131399	-0.766426	-0.836309
4930539M17Rik	0	0	0.1432
4930539N22Rik	0	0	0
4930540M03Rik	0	0	0
4930542C21Rik	0	0	0
4930542D17Rik	0	0	0
4930543E12Rik	0.0619172	0	0
4930543N07Rik	0	0	0
4930544D05Rik	-0.325862	-0.761441	-0.210364
4930544G11Rik	0	0	0
4930544M13Rik	0	0	0
4930545E07Rik	0	0	0
4930545H06Rik	0	0	0
4930545L23Rik	0	0	0
4930546C10Rik	0	0	-0.0622565
4930546K05Rik	0	0	0.0356301
4930547E08Rik	0	0	0
4930547E14Rik	0	0	0
4930548G14Rik	0	0	0
4930548H24Rik	-0.38591	-0.584639	-0.576453
4930548J01Rik	0	0	0
4930548K13Rik	0	0	0
4930549C01Rik	0	0	0
4930549C15Rik	0	0	0
4930549G23Rik	-0.151235	0.843478	0.149652
4930550C14Rik	-0.147187	0.156037	-0.130048
4930550C17Rik	0	0	0
4930550L24Rik	0	0	0
4930552N02Rik	0	0	0
4930552P12Rik	-0.00237768	0	0
4930553C11Rik	0	0	0
4930553E22Rik	0	0	0
4930554C24Rik	0	0	0
4930554G24Rik	0	0	0
4930554H23Rik	0	0	0
4930554I06Rik	0.145668	0	0
4930555B11Rik	0	0	0
4930555B12Rik	0	0	0
4930555G01Rik	0	0	0
4930555G21Rik	0	0	0
4930555K05Rik	0	0	0
4930556C24Rik	0.0962527	0	0
4930556G01Rik	0	-0.157106	0.261389
4930556J02Rik	0	0	0
4930556M19Rik	-0.0144435	0.311028	0.625284
4930556N09Rik	0	0	0
4930556N13Rik	0	0.123159	0
4930557A04Rik	0	0	0
4930557F10Rik	0	0	0
4930557J02Rik	0	0	0
4930557K07Rik	0	0	-0.359361
4930558C23Rik	0	0	0
4930558F17Rik	0	0	0
4930558G05Rik	0	0	0
4930558J18Rik	0.162743	0.240214	0.365693
4930558K02Rik	0.0755466	-0.121765	0
4930559C10Rik	0	0	0
4930562C15Rik	0.0464013	-0.0409411	0.0271145
4930562F07Rik	0.0983506	-0.157777	0
4930563D23Rik	0	0	0
4930563E18Rik	-0.0607552	0.0831586	0
4930563E22Rik	-0.0365852	-0.224653	-0.0361732
4930563F08Rik	0	0	0
4930563H07Rik	0	0	-0.217911
4930563M20Rik	0	0	0
4930563M21Rik	0	0	0
4930564B18Rik	0	0	0.139902
4930564C03Rik	0	0	0
4930564D02Rik	0	0	0
4930565D16Rik	0	0	0
4930565N06Rik	0	0.0540014	0
4930567H12Rik	0	0	0
4930567H17Rik	0	0	0
4930567J20Rik	0	0	0
4930567K12Rik	0	0	0
4930567K20Rik	0	0	0
4930568D16Rik	0	0	0
4930568E12Rik	0	0	0
4930568G15Rik	0	0	0
4930570G19Rik	-0.146466	-0.165905	-0.131972
4930571K23Rik	0	0	0
4930571O06Rik	0	0	0
4930572K03Rik	0	0	0
4930572O03Rik	0	0	0
4930572O13Rik	0	0	0
4930573O16Rik	0	0	0
4930577N17Rik	0.112883	-0.350327	-0.0143839
4930578C19Rik	0	0	0
4930578E11Rik	0	0	0
4930578I06Rik	0	-0.136498	0
4930578M01Rik	-0.101088	-0.457058	-0.286507
4930578N18Rik	0	0	0
4930579F01Rik	0.0517034	0	0
4930579G18Rik	0.192877	-0.345591	-0.0242868
4930579G24Rik	-0.0625549	0.833609	0.542154
4930579H20Rik	0	0	0
4930579J19Rik	0	0	0
4930579K19Rik	-0.259182	-0.737975	-0.436996
4930579P08Rik	0	0	0
4930581F22Rik	-0.0200538	-0.216183	0.249132
4930583K01Rik	0	-0.0152479	-0.158288
4930583P06Rik	0	-0.18884	0.164431
4930584F24Rik	0	0	0
4930586N03Rik	0	0	0
4930587E11Rik	0	0	0
4930590J08Rik	-0.107794	0.204675	-0.288336
4930590L20Rik	0	0	0
4930591A17Rik	0	0	0
4930591E09Rik	0	0	0
4930592A05Rik	-0.17989	-0.0135481	0
4930592I03Rik	0	0	0
4930593A02Rik	0.22319	0.0874466	0.210072
4930593C16Rik	0	0	0
4930594C11Rik	-0.234635	-0.287644	-0.68874
4930594O21Rik	0	0	-0.124194
4930595D18Rik	0	-0.170329	0
4930595M18Rik	0	0	0
4930596D02Rik	0	0	0
4930596I21Rik	-0.904015	-1.02838	-0.24234
4930597A21Rik	0	0	-0.198959
4930597G03Rik	0	0	0
4930598F16Rik	0	0	0
4930599N23Rik	-0.904817	-0.28871	-0.73305
4931402G19Rik	0	0	0
4931403E22Rik	-0.137498	0.499612	0
4931403G20Rik	0	0	0
4931406B18Rik	0	0.0331034	0
4931406C07Rik	-0.206767	0.135568	0.005461
4931406H21Rik	-0.671087	-1.45309	-1.38186
4931406P16Rik	-0.451849	-0.155433	0.183737
4931408C20Rik	0	0.030373	0
4931408D14Rik	-0.0582926	-0.0449372	-0.0116933
4931409K22Rik	-0.0616901	0	-0.0061617
4931414P19Rik	-0.171536	0.0140013	0.0763028
4931417E11Rik	0	0	0
4931419H13Rik	0	0	0
4931420L22Rik	0	0	0
4931423N10Rik	-0.100789	-0.216602	-0.220592
4931428F04Rik	-0.119999	-0.013605	0.49552
4931428L18Rik	0	0	0
4931429I11Rik	-0.0310736	0	-0.139761
4931429L15Rik	0	0	0
4931429P17Rik	0	0	0
4931430N09Rik	0	0	0
4931431B13Rik	0	-0.0262099	-0.060438
4931431C16Rik	-0.0348116	0.0286683	0.0374343
4931431F19Rik	0	0	0
4931440F15Rik	0.0485862	-0.282435	0.0187231
4931440J10Rik	0.074282	-0.298772	-0.161866
4931440P22Rik	0.172305	0.482472	-0.0191392
4932411E22Rik	-0.0357148	-0.106923	0
4932411N23Rik	0	0	0
4932412D23Rik	0	0	0.0520237
4932413F04Rik	0	0	0
4932414J04Rik	0	0	0
4932414N04Rik	0	0	0
4932415M13Rik	0	0	-0.0474399
4932416H05Rik	-0.194495	-0.795129	-0.240675
4932416K20Rik	0	0	0
4932418E24Rik	0.0284059	0.0416367	0
4932429P05Rik	0	0	0
4932435O22Rik	0.0521213	0	-0.042782
4932438A13Rik	-0.191178	-0.138341	-0.159708
4932438H23Rik	-0.00634646	-0.831186	-0.65283
4932441J04Rik	-0.124404	-0.419844	-0.358485
4932443I19Rik	0	-0.177921	-0.177735
4932702P03Rik	0	0	0
4933400A11Rik	0	0	0
4933400B14Rik	0	-0.145382	-0.143652
4933400C23Rik	0	0	0
4933400F21Rik	-0.0524109	0	0.0620056
4933400L20Rik	0	0	0
4933401B06Rik	0	0	0
4933401D09Rik	-0.0043812	-0.107506	0
4933401H06Rik	0	0	0
4933402C06Rik	0	0	0
4933402D24Rik	-0.0538611	0	0
4933402E13Rik	0	0	0
4933402J07Rik	0	0	0
4933402J10Rik	0	0	0
4933402J15Rik	0	0	0
4933402N03Rik	0	0	0
4933402N22Rik	0	0	0
4933402P03Rik	-0.114661	-0.0887827	-0.0886873
4933403O08Rik	-0.178665	-0.179451	-0.183914
4933404G15Rik	0	0	0
4933404K08Rik	0	0	0
4933404K13Rik	0	0	0
4933404O12Rik	-0.24546	-0.234537	0.0463382
4933405D12Rik	0.217802	0.262801	-0.0418411
4933405E24Rik	0	0	0
4933405L10Rik	-0.0097154	0	0.180114
4933405O20Rik	0	0	0
4933406C10Rik	-0.0637395	-0.225431	0.0127039
4933406D12Rik	0	0	0
4933406F09Rik	0	0	0
4933406G16Rik	0.0899401	-0.609183	-0.272016
4933406I18Rik	0.123156	-0.473968	-0.020706
4933406J08Rik	0	0	-0.068334
4933406J10Rik	0	0	0
4933406K04Rik	0	0	0
4933406M09Rik	0	0	0
4933407E24Rik	-0.0505548	0.0692863	0
4933407G14Rik	0	0	0
4933407I05Rik	0	0	0
4933407K13Rik	-0.0638723	-0.142107	-0.224361
4933407L21Rik	-0.368409	-0.772327	-0.342078
4933408B17Rik	-0.0822321	-0.243249	-0.620904
4933408J17Rik	0.0430681	-0.0774364	0.131197
4933408N05Rik	0	0	0
4933409G03Rik	0	0	0
4933409K07Rik	0	-0.00887217	0
4933411E08Rik	0	0.07598	-0.0841876
4933411G06Rik	0	0	0
4933411K16Rik	0.00779586	0.0898411	0.0697149
4933412E12Rik	-0.168284	0.127729	0.0219245
4933412E24Rik	0	-0.0819882	0
4933412O06Rik	0	0.113773	0.211133
4933413G19Rik	0.131234	-0.0125684	-0.695059
4933413J09Rik	0	0	0
4933413L06Rik	0	0	0
4933415F23Rik	0.044882	0.0728164	0.0699961
4933416C03Rik	0	0	0
4933416E03Rik	0	0	0
4933416I08Rik	0	0	0
4933416M06Rik	0	0	0
4933416M07Rik	0.0582042	-0.0941543	0.0816362
4933417A18Rik	0	0	0
4933417D19Rik	-0.141739	-0.309003	0.119577
4933417E11Rik	-0.085579	0	-0.0168786
4933417G07Rik	0	-0.0141241	0
4933417O13Rik	0	0	0
4933421I07Rik	0	0	0
4933421O10Rik	-0.110695	-0.313515	-0.385903
4933422A05Rik	-0.00819795	0.112216	-0.0624129
4933424G05Rik	0.0508299	-0.0823536	0
4933424G06Rik	0	0.0753568	-0.236798
4933425B07Rik	-0.00305849	0.0674235	0
4933425L06Rik	0	0	0
4933427D06Rik	0.0280785	0.147869	-0.00738431
4933427D14Rik	-0.0360611	-0.159519	0.242627
4933427E11Rik	0.101783	0.0708483	0.00399304
4933427E13Rik	0	0	0
4933427G17Rik	0.0928367	0.118728	0.101511
4933427I22Rik	0	0	0
4933428C19Rik	0	0	0
4933428G20Rik	-0.185926	-0.364843	-0.112734
4933429K18Rik	0	0	0
4933429O19Rik	0	0	0
4933430H16Rik	0	0	0.0860389
4933430I17Rik	-0.212309	0.659521	0.604276
4933430M04Rik	0	0	0
4933430N04Rik	0	0	0
4933431E20Rik	-0.413929	-1.03399	-0.582249
4933431G14Rik	0	0	0
4933432G23Rik	0	0	0
4933432I03Rik	0	0.231062	-0.132916
4933432I09Rik	-0.176914	-0.11137	-0.544356
4933432K03Rik	0	0	0
4933433C11Rik	-0.00407343	-0.0998795	0.0866228
4933433F19Rik	0	0	0
4933433G08Rik	0	0	0
4933433G15Rik	-0.08443	0.669316	-0.384423
4933433G19Rik	0.0826741	0	0.11557
4933433H22Rik	-0.103901	-0.0803835	0.199614
4933434E20Rik	0.0949206	0.0127558	-0.168002
4933436E23Rik	0	0	0
4933436H12Rik	0	0	0
4933436I01Rik	0	0	0
4933438B17Rik	0	0	0
4933438K21Rik	0	0	0
4933439C10Rik	-0.03104	0.181569	-0.124414
4933439K11Rik	0	0	0
4933440J02Rik	0	0	0
4933440M02Rik	-0.0555964	0	0
5031410I06Rik	-0.0949094	-0.0493294	-0.0969239
5031414D18Rik	0.0390461	0.362392	-0.0951786
5031425E22Rik	-0.352112	-0.148045	-0.23569
5031425F14Rik	0	0	0
5031426D15Rik	0.0587631	-0.183763	0.0779735
5031434C07Rik	0	0	0
5031434O11Rik	-0.335859	-0.84226	-0.0424837
5031439G07Rik	0.12453	0.385661	0.450096
5033403F01Rik	-0.184941	-0.191258	0.557146
5033403H07Rik	0	0	0
5033404E19Rik	0	0	0
5033406O09Rik	0.118477	0.213982	0.463578
5033428I22Rik	-0.0978332	0.255303	0.12823
5330411J11Rik	-0.0574583	0	0
5330413P13Rik	0	-0.11907	0.00659126
5330417C22Rik	-0.00679379	-0.0123947	0.234651
5330426P16Rik	-0.235879	-0.252778	0.87772
5330434G04Rik	-0.0276737	0	0
5330439B14Rik	0	0	0
5430401F13Rik	0	0	0
5430402E10Rik	0	0	0
5430402O13Rik	0.153964	-0.144788	-0.258764
5430403N17Rik	-0.236023	-0.650121	-0.287809
5430405H02Rik	0.0209436	-0.171199	-0.354856
5430416N02Rik	-0.0599447	0.609785	0.675074
5430416O09Rik	0	0	0
5430419D17Rik	0.0539756	-0.0496441	0.0429555
5430421F17Rik	0.0559994	0	0.157916
5430421N21Rik	0	0	0
5430425K12Rik	-0.00880878	0	0.277234
5430427M07Rik	0	0	0
5430427O19Rik	0	0.034255	0
5430428K19Rik	0	0	0
5430431A17Rik	-0.116393	0	0.15226
5430434I15Rik	0	0	0
5430437J10Rik	0.147093	0	0
5430440P10Rik	-0.0918625	0	0
5530400C23Rik	0	0	0
5530401A14Rik	0	0	0
5530601H04Rik	0.109957	0.126447	-0.222886
5730403I07Rik	0	-0.0070233	0
5730405O15Rik	0.376029	0.688253	0.0241848
5730408K05Rik	0.701358	1.3171	0.544638
5730409E04Rik	-0.428567	-0.661173	0.122432
5730412P04Rik	0	0	0
5730416F02Rik	0	0	0
5730420D15Rik	0.0744253	-0.0217166	-0.126363
5730422E09Rik	-0.0238543	-0.16129	-0.43121
5730435O14Rik	0	0	-0.221513
5730455P16Rik	0.0102948	-0.0390858	0.485446
5730457N03Rik	0	-0.098025	0
5730460C07Rik	0	0	0
5730480H06Rik	-0.291901	-0.656278	0.18526
5730488B01Rik	0	0	0
5730507C01Rik	-0.00233572	-0.0203978	-0.167621
5730508B09Rik	-0.0557549	0.708004	0.0930751
5730522E02Rik	-0.0645143	-0.182538	-0.100712
5730559C18Rik	-0.301268	-0.443047	0.136956
5830411N06Rik	0	0	0
5830415F09Rik	0.176819	0.183639	-0.134952
5830416I19Rik	-0.0361842	0	-0.108179
5830416P10Rik	0.588836	0.627318	1.14819
5830417I10Rik	0.0753199	-0.017053	0.235093
5830418P13Rik	0	0	0.0574562
5830428M24Rik	0.0652234	0.155687	-0.260004
5830432E09Rik	0.503589	0.578624	0.671118
5830444B04Rik	-0.0297681	0	-0.0453847
5830454E08Rik	0.18646	0.23746	-0.196431
5830473C10Rik	0.110387	-0.0681567	-0.0702854
5930403L14Rik	-1.16255	-2.41293	-1.14792
5930412G12Rik	0	-0.118022	-0.0601521
5930430L01Rik	-0.184405	-0.457463	0.177017
5930438M14Rik	0	0	0
6030407O03Rik	0	0.0719882	-0.155372
6030408B16Rik	0.112065	0.116425	-0.323964
6030419C18Rik	-0.907869	-0.395686	0.434547
6030440G07Rik	0	0	-0.247762
6030443J06Rik	-0.0274858	-0.538004	0.339574
6030458C11Rik	-0.176093	-0.454951	0.26228
6030466F02Rik	0	0	0
6030468B19Rik	0	0	0
6030469F06Rik	0	0	0.0796991
6030471H07Rik	0	0	0
6030498E09Rik	0	0	0
6230400D17Rik	-0.176467	-0.297376	-0.51982
6330403A02Rik	0.0407249	-0.0223797	-0.0443691
6330403K07Rik	-0.416168	-0.960848	0.400622
6330407A03Rik	-0.00319156	-0.152483	-0.505172
6330408A02Rik	-0.261429	-0.00142161	-0.0247281
6330409D20Rik	0	0	0
6330410L21Rik	0	0	0
6330415B21Rik	-0.0846128	-0.0651526	0.213521
6330415G19Rik	0.0576336	0.0344539	-0.136476
6330416G13Rik	-0.325658	-0.66155	-0.643992
6330418K02Rik	-0.0992048	-0.656326	-0.237722
6330549D23Rik	0.592518	-0.149818	0.0530927
6430411K18Rik	-0.360816	-1.2579	-0.686592
6430503K07Rik	0	0	0
6430531B16Rik	-0.0205081	-0.132357	-0.22472
6430548M08Rik	0.522189	-0.61447	-0.406625
6430550D23Rik	-0.00579754	0.122264	-0.081213
6430562O15Rik	0.0463397	-0.0871238	-0.0209839
6430571L13Rik	-0.132547	-0.0365324	-0.373617
6430573F11Rik	-0.0635683	-0.274901	0.102312
6430584L05Rik	-0.0889503	0.0820041	0.0788375
6430706D22Rik	0	0	0
6430710C18Rik	0	0	0
6530402F18Rik	-0.220245	0.0200892	-0.215218
6530403H02Rik	0	0	0.0322543
6530411M01Rik	-0.150031	-0.116487	-0.32423
6720468P15Rik	-0.0544152	-0.0805587	0.136387
6720483E21Rik	0.25452	-0.133174	-0.339927
6720489N17Rik	0.0477478	0.363832	0.33854
6820408C15Rik	-0.294177	-0.403104	0.245842
6820431F20Rik	0.068064	-0.227368	-0.0170253
7420426K07Rik	0	0	0
7420461P10Rik	-0.23914	-0.186928	0
7420700N18Rik	0	-0.0818068	-0.0108285
7420701I03Rik	0	0	0
7530416G11Rik	0	0	0
7630403G23Rik	0.0811138	0	0
8030411F24Rik	0	0	0
8030423F21Rik	0	-0.377974	-0.115452
8030423J24Rik	0.100319	0	0
8030442B05Rik	0	0	0
8030443G20Rik	0	0	0
8030451O07Rik	0	0	0
8030455M16Rik	0	0	0
8030462N17Rik	-0.216908	-0.370405	0.00783534
8430408G22Rik	-0.071377	0	-0.10802
8430419L09Rik	-0.215554	-0.867281	-0.574798
8430422H06Rik	0	0.100747	0
8430423G03Rik	0.0977064	-0.214646	0.138295
8430426J06Rik	0.0718768	0	0
8430429K09Rik	0.132639	-0.347912	0.28847
8430430B14Rik	0	0	0
8430431K14Rik	-0.0659988	-0.00506479	-0.0606798
8430436N08Rik	-0.0053329	0	0
8430437L04Rik	0	0	0
9030025P20Rik	0.275352	-0.300324	-0.14187
9030204H09Rik	0	-0.210364	0
9030404E10Rik	0	0	-0.117287
9030612E09Rik	-0.140932	-0.0808095	-0.219336
9030617O03Rik	0.600779	0.297321	0.298461
9030619P08Rik	0	0	0
9030624G23Rik	-0.341406	-0.385612	-0.100015
9030624J02Rik	-0.266646	-0.321547	-0.246638
9030625G05Rik	0	0	0
9130008F23Rik	0.198981	1.4241	1.77915
9130011E15Rik	-0.214297	-0.362263	-0.15297
9130015A21Rik	0	0	0
9130015L21Rik	0	0	0
9130019O22Rik	-0.323212	-0.941181	-0.735237
9130019P16Rik	0	-0.00326135	-0.0362195
9130023H24Rik	-0.588838	-1.19779	-0.455403
9130024F11Rik	-0.116675	-0.197203	0.136771
9130204L05Rik	0	0.248136	0
9130209A04Rik	0	0	0
9130221F21Rik	0	0	0
9130221H12Rik	-0.0432149	-0.166255	-0.292097
9130227L01Rik	0	0	0
9130230L23Rik	0.0607913	0.152827	0
9130401M01Rik	0.15349	-0.201401	0.14173
9130409I23Rik	0.122011	0.165553	-0.0192058
9130409J20Rik	0.0583547	0.0851295	0.369445
9230009I02Rik	0	0	0
9230102K24Rik	-0.00445168	0	0
9230102O04Rik	0.22628	0	0
9230104L09Rik	0	-0.208876	-0.208884
9230105E05Rik	-0.00511773	0	0
9230110C19Rik	-0.10101	-0.169903	-0.394465
9230110F15Rik	-0.082501	0	0
9230112D13Rik	0	0	0
9230112J17Rik	0	0	-0.0591168
9230114K14Rik	-0.212037	-0.622905	-0.0943732
9230116L04Rik	-0.162521	0.191246	0.239785
9230116N13Rik	-0.0574826	0.318063	0.39387
9230117E06Rik	0	0	-0.268291
9330020H09Rik	-0.0748267	0.518662	0.18547
9330102E08Rik	0.22079	0.0163351	0.263183
9330111N05Rik	0	0	0.0695854
9330117O12Rik	0.048249	0.0704991	0.158633
9330133O14Rik	-0.0756593	-0.209213	0.411334
9330136K24Rik	0.059399	0.232249	0.0884777
9330151L19Rik	-0.220687	-0.206184	-0.430774
9330158H04Rik	0	0	0
9330159F19Rik	-0.211069	-0.872846	-0.523213
9330159M07Rik	-0.284811	-0.0511034	0.0853952
9330162012Rik	0.134127	-0.440901	-0.465216
9330162B11Rik	0	0	0
9330175E14Rik	-0.0638313	-0.322049	-0.322198
9330175M20Rik	-0.0372759	-0.0108844	0.0491777
9330178D15Rik	0	0	0
9330179D12Rik	-0.0643642	-0.104949	-0.413929
9330182L06Rik	-0.227107	-0.953798	-0.367993
9330182O14Rik	0	0	0
9330188P03Rik	-0.418789	-1.76273	-1.84325
9330199G10Rik	0	0	0
9430007A20Rik	0	0	0
9430014N10Rik	0	0	0
9430015G10Rik	-0.0847563	-0.225999	-0.366474
9430016H08Rik	-0.072165	-0.339916	-0.302788
9430018G01Rik	-0.00288256	0.0635093	0.140254
9430019J16Rik	0	0	0
9430020K01Rik	-0.710264	-0.971947	-0.69215
9430021M05Rik	-0.202435	0.035438	0.0886882
9430037G07Rik	-0.154199	0.127564	0.304157
9430038I01Rik	-0.0124006	-0.470805	0.590072
9430041J12Rik	-0.11992	-0.122573	-0.00833211
9430060I03Rik	0.084173	-0.0528055	-0.0215358
9430065F17Rik	-0.127905	0.0752959	-0.0132017
9430069I07Rik	0.14978	0.165111	-0.620149
9430076C15Rik	-0.218266	0.123734	-0.250276
9430078K24Rik	0	-0.10165	0.0852344
9430083A17Rik	0.0247898	0.0981132	0.0864171
9430091E24Rik	-0.225402	0.165989	-0.377227
9530002B09Rik	0	0	0
9530003J23Rik	0	0	0
9530014B07Rik	0	0	0
9530020I12Rik	-0.0415874	0	0.107671
9530026F06Rik	0	0	0
9530026P05Rik	0.323256	0.447848	0.228769
9530027J09Rik	-0.0599802	-0.0852502	-0.021398
9530036O11Rik	0	0	0
9530051G07Rik	-0.50006	-0.789292	-0.588369
9530052E02Rik	0.147063	-0.147815	0.49126
9530053A07Rik	0.0172023	0.0331778	0.0318757
9530059O14Rik	0.022518	0	-0.0366654
9530062K07Rik	-0.114586	0.331473	0.24339
9530068E07Rik	-0.343736	-0.76878	-0.527221
9530077C05Rik	-0.1756	0.080816	0.631323
9530080O11Rik	0	0.0749095	0.07201
9530082P21Rik	-0.461578	-1.01718	-0.0325558
9530091C08Rik	-0.114583	-0.988216	-0.685649
9630001P10Rik	0.062844	0	0
9630013A20Rik	0	0	0
9630013K17Rik	0	-0.131752	0
9630028B13Rik	-0.160494	-0.0427792	-0.0907411
9630028H03Rik	-0.0415157	0	0.0547457
9630028I04Rik	-0.198645	-0.0629442	-0.66084
9830107B12Rik	0	0	0
9830132P13Rik	-0.0228289	0	0
9830147E19Rik	-0.180033	0.0205757	0.201502
9830166K06Rik	0	0	0.0457743
9930012K11Rik	-0.840517	-0.194734	-0.289706
9930014A18Rik	-0.20899	-0.904504	-0.0561129
9930021J03Rik	-0.491335	-0.561312	-0.338481
9930104L06Rik	-0.102222	0.0589613	-0.0545811
9930111H07Rik	0	0	0
9930111J21Rik1	-0.638613	1.25715	1.98583
9930111J21Rik2	-0.0786646	0.194815	0.6081
a	0.124896	0.484892	0.173609
A130010J15Rik	-0.240099	-0.309122	0.42511
A130077B15Rik	0	0	0.0492726
A1bg	0	0	0.0683836
A1cf	0	0	0
A230001M10Rik	0	0	0
A230009B12Rik	0	0	-0.0942935
A230020J21Rik	0.0431617	0	-0.0114989
A230028O05Rik	-0.189321	-0.356633	0.100206
A230046K03Rik	-0.30585	-0.0242491	-0.00966442
A230050P20Rik	-1.19232	-1.62373	-0.362232
A230056J06Rik	-0.0302351	-0.0089277	-0.0508387
A230056P14Rik	-0.0114227	0.0963874	-0.060866
A230057D06Rik	0.330988	-0.307733	-0.586961
A230065H16Rik	-0.361038	-0.0198164	-0.391441
A230070E04Rik	0.0943903	-0.0146144	0
A230072C01Rik	0.0166383	-0.337356	0.0110892
A230072E10Rik	0.0510608	-0.0502845	0.143475
A230077H06Rik	0	0	0
A230103J11Rik	0.0724701	0.0975996	0.139739
A230108P19Rik	0	-0.0579745	0
A2m	-3.59813	-0.785326	1.33546
A330009N23Rik	0.053148	-0.401679	-0.483965
A330015K06Rik	0.130572	0.157964	-0.190437
A330023F24Rik	-0.346743	-1.22291	-1.34358
A330032B11Rik	0	0	0
A330033J07Rik	0.0317084	0	0
A330035P11Rik	-0.209338	-0.04959	-0.270755
A330040F15Rik	0.0794012	0	0
A330041J22Rik	-0.147144	-0.647476	-0.154745
A330048O09Rik	0.248094	0.186692	0.483373
A330049N07Rik	0	0	0
A330050F15Rik	0.038794	0	-0.0629463
A330069E16Rik	-0.097628	0.406119	0.572478
A330070K13Rik	0	0	0
A330074K22Rik	-0.367481	0.561755	1.01534
A330076C08Rik	0	0.0670494	0
A330076H08Rik	-0.0588775	0.0245712	-0.319783
A330093E20Rik	-0.0779298	-0.0601684	-0.41557
A330102I10Rik	0.739349	1.14847	0.628202
A3galt2	-0.296707	-0.525447	-0.61427
A430005L14Rik	-0.110689	-0.389483	-0.00840117
A430033K04Rik	-0.128892	-0.454142	0.118188
A430035B10Rik	-0.0962028	-0.0781334	-0.389936
A430046D13Rik	0.209951	0.355371	0.133623
A430078G23Rik	0	0	0
A430078I02Rik	0.0216079	-0.116111	-0.339642
A430085M09Rik	0	0	0
A430088P11Rik	0	0	0
A430089I19Rik	0	0	0
A430090L17Rik	0	0	0.0342167
A430093F15Rik	0	0	0.0591331
A430105I19Rik	-0.0675437	0.00796271	-0.0943873
A4galt	-0.254823	1.1939	1.97733
A4gnt	0	0	0
A530006G24Rik	0	0	0
A530013C23Rik	0.134464	-0.558981	-0.44542
A530016L24Rik	-0.0361028	0	0.0476362
A530032D15Rik	-0.0564594	-0.228518	-0.763959
A530046M15Rik	0.205824	0.0839465	0.229721
A530050N04Rik	0	0	0
A530053G22Rik	0	0	0
A530058N18Rik	0	0	0
A530064D06Rik	0	0	0
A530065N20Rik	0	0	0
A530072M11Rik	-0.0163078	-0.492581	-0.335421
A530088E08Rik	0	0	0
A530099J19Rik	0	0	-0.0523123
A630001G21Rik	-0.585502	-0.689117	-0.13956
A630010A05Rik	0	0	0
A630012P03Rik	0	0	0
A630019I02Rik	0	0	0
A630020A06	-0.0133385	-0.0186262	0.0749478
A630023A22Rik	0	0	-0.0140329
A630023P12Rik	0	0	0
A630033H20Rik	-0.250562	-0.197306	-0.374067
A630066F11Rik	0.0470284	0.485668	0.497582
A630072M18Rik	-0.20028	-0.42051	-0.170675
A630073D07Rik	0	0	0
A630075F10Rik	0	0	0
A630076J17Rik	0	0	0
A630077J23Rik	0	-0.146804	0
A630089N07Rik	-0.207291	-0.00439308	0.616922
A630095E13Rik	0.265661	0.532659	0.192772
A630095N17Rik	0	0	0
A730004F24Rik	0	0	-0.0821277
A730006G06Rik	0.0485343	0	0
A730008H23Rik	0	0	0
A730017C20Rik	-0.0959156	-0.338065	-0.389094
A730017L22Rik	-0.0891097	-0.233424	0.576101
A730018C14Rik	0	0	0
A730020E08Rik	-0.253035	0.0654025	0.0821773
A730020M07Rik	0	0	0
A730036I17Rik	0.0260607	0.0382135	0.0367164
A730043L09Rik	0	0	0.102236
A730046J19Rik	0.0378585	-0.0310815	0
A730056A06Rik	-0.0479542	-0.106631	-0.118829
A730082K24Rik	0	0	0
A730085K08Rik	0	0	0
A730090H04Rik	-0.0568146	0	-0.0114073
A730090N16Rik	0.0405436	-0.25688	-0.470636
A830009L08Rik	-0.0339291	-0.00995977	0.0447788
A830010M20Rik	0.100105	0.0435883	0.231443
A830011K09Rik	0	0	-0.0568637
A830018L16Rik	-0.0682869	-0.122528	0.0291885
A830019L24Rik	0	0	0
A830052D11Rik	0.0403043	-0.130911	-0.32195
A830080D01Rik	-0.00913245	0.215628	0.337203
A830082K12Rik	-0.401582	-0.830442	-0.196261
A830082N09Rik	-0.0869313	-0.517264	-0.0996697
A930001A20Rik	0	0	0
A930001C03Rik	0.152931	0.487331	0.146292
A930002C04Rik	0	0	0
A930003A15Rik	0	0.0930565	-0.338679
A930003O13Rik	-0.0955527	0	-0.073797
A930004D18Rik	-0.16218	-0.169466	0.869904
A930005H10Rik	0.0836937	-0.371574	0.345776
A930006I01Rik	0.039944	0	0
A930006K02Rik	-0.197026	-0.840403	-0.416148
A930007I19Rik	-0.173555	-0.270169	-0.192698
A930009A15Rik	0	0.126321	0
A930011G23Rik	-0.00178095	-0.166396	0.03757
A930012L18Rik	-0.146364	0.026131	0.188366
A930013F10Rik	-0.647714	-0.396504	-0.328907
A930015D03Rik	0.384536	-0.223797	0.260952
A930016O22Rik	-0.0371609	-0.163662	0
A930017M01Rik	-0.109834	-0.085695	-0.168657
A930018P22Rik	0.106223	-0.459943	0.282255
A930019D19Rik	0	0	0
A930024E05Rik	0.200487	-0.362242	-0.245761
A930031H19Rik	0	0	0
A930041C12Rik	0.432523	0.425665	-0.251784
AA387883	0.10372	0.0770817	0.0741003
AA388235	0	0.067168	0
AA413626	0.0537318	-0.792192	0.350097
AA414768	-0.276775	-0.13221	0.887781
AA415398	-0.212548	-0.539972	-0.296778
AA465934	-0.139405	-0.258186	-0.0406717
AA467197	-1.25531	-1.75909	-1.45089
AA474331	-0.0677523	-0.382983	0.0142361
AA536875	0	0	0
AA543186	0.274191	-0.21048	-0.34701
AA543401	0	0	0
AA545190	0	0	0
AA619741	0	0	0
AA792892	0	0	0.101666
AA986860	-0.132552	0.0941474	-0.290233
Aaas	0.129847	0.63114	0.2862
Aacs	0.0927049	0.186578	0.901842
Aadac	0	0	-0.109869
Aadacl2	0	0	0
Aadacl3	0	0	0
Aadat	-0.10195	0.114238	0.582208
Aaed1	0.510997	0.54966	0.930441
Aagab	-0.0205869	-0.151959	0.0569106
Aak1	-0.264919	-0.697704	-0.425225
Aamdc	-0.112641	-0.893215	-0.266988
Aamp	0.0791749	-0.123901	0.013678
Aanat	0	0	-0.189981
Aar2	-0.158281	-0.218615	-0.325055
Aard	-1.03401	-0.511325	-0.7298
Aars	-0.272524	-0.275574	0.203858
Aars2	-0.21542	-0.253095	0.131107
Aarsd1	0.11044	0.114235	0.376815
Aasdh	0.161979	0.232283	0.147503
Aasdhppt	0.0656259	0.10662	0.407278
Aass	-0.301793	0.0938355	0.644945
Aatf	0.189612	0.307511	0.594291
Aatk	-0.544017	-1.26927	-1.4107
AB124611	-0.441218	-0.295369	-0.210114
Abat	0.0947215	-0.986884	0.338991
Abca1	-1.19497	-2.17859	-2.50552
Abca12	-0.0567611	-0.0557169	-0.0901329
Abca13	-0.244864	-0.330048	0.214835
Abca14	-0.0527216	0.0244827	-0.0303381
Abca15	0	-0.0544019	0.0237334
Abca16	-0.0363205	-0.0279504	-0.0279197
Abca17	0.0172512	0.0253318	0
Abca2	-1.11665	-1.94197	-1.68489
Abca3	0.10633	-0.125514	-0.245282
Abca4	-0.0279357	0.158499	0.133757
Abca5	0.262833	0.625814	0.706809
Abca6	0.00263806	0.349265	0.303713
Abca7	-0.248751	0.160021	0.276573
Abca8a	0.167203	-0.191722	0.209683
Abca8b	0.331036	0.651791	0.913652
Abca9	-0.049188	-0.136054	1.49952
Abcb10	0.0673599	0.0476798	0.578142
Abcb11	0.0183263	0.0792574	0.0463269
Abcb1a	-0.0450912	1.08441	0.425604
Abcb1b	-0.304648	0.62094	0.235154
Abcb4	0.000236512	0.423352	1.05968
Abcb5	0.0231059	-0.00376205	-0.0376178
Abcb6	-1.0724	-1.74107	-1.74034
Abcb7	-0.166542	-0.191429	0.0333482
Abcb8	-0.166793	-0.838626	-0.546786
Abcb9	-0.132965	0.1242	-0.11579
Abcc1	-0.0352626	-0.435406	-0.0737458
Abcc10	-0.117197	-0.711223	-0.321326
Abcc12	-2.13596	-2.53591	-2.00803
Abcc2	-0.0011164	0	0
Abcc3	-0.205129	-0.226112	-0.179426
Abcc4	0.171212	-1.11082	-0.766046
Abcc5	0.108764	-0.0668531	0.0770334
Abcc6	-0.0576299	0.0265671	-0.00779162
Abcc8	-0.038405	0.0198443	0.050661
Abcc9	0	-0.0211848	0
Abcd1	-0.423405	-0.366515	0.126503
Abcd2	-0.722296	-0.490181	0.225956
Abcd3	0.211215	0.132229	0.369582
Abcd4	0.351998	0.00242133	0.0146028
Abce1	-0.049533	0.102452	0.280627
Abcf1	-0.0590849	0.130699	0.382836
Abcf2	0.0943301	-0.0869152	0.389492
Abcf3	-0.119981	-0.207633	-0.0892902
Abcg1	-0.020537	0.116706	0.16417
Abcg2	0.289544	-0.17446	-0.0714703
Abcg3	-0.031418	0	0
Abcg4	-1.02866	-1.41114	-0.993212
Abcg5	0	0.0575805	0
Abcg8	-0.0254786	0	-0.0388751
Abhd1	0.338378	-0.43703	-0.245154
Abhd10	-0.31566	-0.0850762	0.148447
Abhd11	0.028672	0.084196	0.368359
Abhd11os	0	0	0
Abhd12	-0.116222	-0.0566695	-0.0390343
Abhd12b	0	0	0
Abhd13	-0.477577	-0.416098	-0.424627
Abhd14a	0.26418	-0.278959	-0.122063
Abhd14b	0.276047	0.990453	1.1301
Abhd15	-1.28467	-2.4357	-2.05378
Abhd16a	-0.0720928	-0.915589	-0.515736
Abhd16b	-0.0547058	-0.00798358	-0.16009
Abhd17a	0.318509	-0.364098	0.0418847
Abhd17b	-0.203547	-0.442821	-0.145549
Abhd17c	-0.0821156	-0.0103727	0.266512
Abhd2	-0.486787	-1.34081	-1.11475
Abhd3	-0.0984038	0.118545	0.208012
Abhd4	-0.0852006	0.325737	-0.560573
Abhd5	0.198732	0.183313	0.225188
Abhd6	0.208102	-0.168382	0.111135
Abhd8	-0.0250563	-0.178372	-0.207996
Abi1	-0.100258	0.240429	0.220292
Abi2	-0.392329	-0.72482	-0.451205
Abi3	0.0436421	0	0
Abi3bp	-0.183913	0.0625482	0.221756
Abl1	-0.249354	-0.163359	0.126162
Abl2	-0.299616	-0.340107	-0.175121
Ablim1	0.437004	1.42738	2.23859
Ablim2	-0.025398	-0.00755773	0.0708266
Ablim3	-0.0842888	0.669406	-0.0315142
Abo	0	0	0
Abr	0.00851013	-0.489752	-0.132501
Abra	0	0.0735417	0
Abracl	0.167901	0.846214	1.41109
Abt1	-0.0659935	0.00377294	0.341633
Abtb1	-0.213546	0.462528	-0.799058
Abtb2	-0.137901	-0.263841	-0.130075
Acaa1a	0.125142	-0.493431	-0.303836
Acaa1b	-0.125602	-0.235684	-0.119462
Acaa2	0.436481	0.384472	0.220172
Acaca	-0.353678	-0.419344	0.131063
Acacb	-0.510369	-0.0570673	-0.140711
Acad10	0.129253	-0.332162	-0.22627
Acad11	0.153016	0.145576	-0.246747
Acad12	0.227982	0.509379	0.24289
Acad8	0.165103	-0.371283	-0.0929243
Acad9	0.0378197	-0.0674274	0.412398
Acadl	-0.0551332	-0.216797	-0.724487
Acadm	0.397314	0.521105	0.661533
Acads	0.255794	0.346597	0.226745
Acadsb	-0.157625	-0.145638	0.382826
Acadvl	0.138748	-0.29882	-0.0266557
Acan	-0.848574	-2.8503	-1.08795
Acap1	-0.00466306	-0.0111691	0.0322217
Acap2	-0.144182	0.149789	-0.0347104
Acap3	0.000922154	0.198345	0.0142439
Acat1	-0.120164	-0.353459	-0.0026486
Acat2	0.0306215	0.579865	0.951947
Acat3	0.107188	0.00474385	0.173074
Acbd3	-0.405385	-0.321564	-0.317141
Acbd4	0.29931	0.0667873	0.210216
Acbd5	0.0266826	-0.281952	-0.198198
Acbd6	-0.267081	0.156213	-0.0197002
Acbd7	0.553719	0	0
Accs	0.173619	0.591496	0.47935
Accsl	0.0400149	-0.00643659	0
Acd	0.0409014	0.237095	0.314815
Ace	1.28067	1.81054	1.63093
Ace2	0	0	0.0346063
Ace3	0	0	0
Acer1	0.0366966	-0.0596346	0
Acer2	-0.117958	0.191561	0.034098
Acer3	-0.486601	-0.47578	-0.899028
Ache	-0.0457113	0.226473	0.837237
Acin1	-0.0867443	-0.0415649	0.107061
Ackr1	-1.35962	-1.84068	-0.934092
Ackr2	0	-0.00480742	0
Ackr3	-1.42739	-0.868628	-0.178801
Ackr4	-0.349198	-0.0755121	-0.473458
Acly	0.090048	0.0937097	0.806747
Acmsd	0	0	0
Acnat1	-0.0189651	0.0260977	0
Acnat2	0	0	0
Aco1	0.0590549	-0.165291	0.289293
Aco2	0.211041	0.0818648	-0.105566
Acot1	-1.07622	-0.883002	-0.755205
Acot10	0.0460097	-0.0931458	-0.182107
Acot11	-1.93537	-2.16218	-1.1579
Acot12	-0.0625236	0.0429553	0.120443
Acot13	0.409193	0.738799	-0.0144014
Acot2	-0.258037	0.415002	0.961682
Acot3	0.0313109	-0.055935	0.095254
Acot4	-0.0114946	-0.177359	0.0341979
Acot5	-0.00739177	-0.405724	-0.184129
Acot6	-0.550555	-0.563403	-0.241459
Acot7	0.192201	0.505748	0.772851
Acot8	0.201145	0.134762	0.15313
Acot9	0.0107246	0.751893	0.761047
Acox1	-0.0521414	0.0888488	0.336844
Acox2	0.697394	1.00478	2.09706
Acox3	-0.328218	-0.183319	-0.175296
Acoxl	-0.065841	0.090062	-0.147136
Acp1	-0.0217613	-0.180101	0.00216515
Acp2	-0.296119	-1.24622	-0.532093
Acp5	0.330897	0.0982944	0.285741
Acp6	0.572494	0.6028	0.620385
Acpp	-0.722071	1.25382	-0.410951
Acpt	0.0689661	0	0
Acr	0.0564922	-0.00898134	-0.18062
Acrbp	-0.264449	0.699124	-0.19238
Acrv1	0	0	0
Acsbg1	-4.31802	-4.40931	-3.67074
Acsbg2	0	-0.00552534	0
Acsf2	-0.182534	-0.290465	-0.231499
Acsf3	0.042408	-0.0740362	0.465203
Acsl1	0.266873	0.354519	0.909279
Acsl3	-0.333902	-0.331588	-0.238893
Acsl4	0.138088	0.245111	0.27325
Acsl5	0.1514	0.442085	0.438025
Acsl6	0.820497	-0.337977	0.829285
Acsm1	0	0	0
Acsm2	-0.0142317	0	0
Acsm3	0	0	-0.0507661
Acsm4	0.041334	0	0
Acsm5	0	0	0
Acss1	-0.196546	-0.178133	-0.224578
Acss2	0.154766	-0.196984	0.624574
Acss2os	-0.145607	0.197233	0.1899
Acss3	0.0972666	-1.11076	-0.35807
Acta1	-0.21303	0.863733	0.11637
Acta2	-1.07858	0.999831	0.741888
Actb	-0.0848852	0.0447325	0.668644
Actbl2	0	0	0
Actc1	0	0	0
Actg1	0.0188312	0.848614	1.10296
Actg2	-0.00843066	-0.439012	-0.297224
Actl10	0.0368105	-0.179933	-0.393351
Actl11	0	-0.00365444	0.0316231
Actl6a	0.0578655	-0.0815131	0.163913
Actl6b	0	0	0
Actl7a	0	0	0
Actl7b	-0.0704819	-0.18982	-0.1975
Actl9	0.0644827	0	0
Actn1	-0.870034	-0.813674	-0.43072
Actn2	0.0157927	0.103722	0.358629
Actn3	-0.21215	0.359681	0.469946
Actn4	-0.569936	-0.54477	-0.125072
Actr10	-0.325809	-0.438509	-0.228241
Actr1a	-0.21397	-0.213733	-0.161241
Actr1b	0.0214499	-0.119222	0.240455
Actr2	-0.216319	-0.0496063	0.129769
Actr3	-0.345021	-0.179977	0.123428
Actr3b	0.0628385	-0.864933	-0.0879575
Actr5	-0.113321	-0.235888	-0.218002
Actr6	-0.159564	-0.0208808	-0.0285518
Actr8	-0.164034	-0.139165	-0.252076
Actrt1	0	0	0
Actrt2	0	0	0
Actrt3	-0.0500559	0	0.18943
Acvr1	-0.654198	-0.88822	-0.21417
Acvr1b	-0.19892	-0.200941	-0.284485
Acvr1c	-0.122066	0.0716467	-0.00219358
Acvr2a	-0.570416	-0.499266	-0.276083
Acvr2b	-0.478414	0.0795424	-0.850706
Acvrl1	-0.980793	-0.57677	-0.46272
Acy1	0.0175782	0.448447	0.224861
Acy3	-0.257669	-0.363887	-0.652152
Acyp1	0.794913	0.479031	0.710491
Acyp2	-0.317025	-0.668319	0.36545
Ada	-0.125263	-0.374416	-0.309281
Adad1	0	0	0
Adad2	0	0	0
Adal	-0.385318	-0.440431	-0.322481
Adam10	-0.262712	-0.573292	-0.586616
Adam11	-0.139137	0.44191	0.387735
Adam12	-1.47376	-1.72996	-1.26453
Adam15	0.528289	0.0656161	0.304228
Adam17	-0.421926	-1.35311	-0.971659
Adam18	0	0.0552356	0
Adam19	-0.51562	-0.737448	-0.0732164
Adam1a	-0.141971	-0.860808	-0.352935
Adam1b	-0.00206482	-0.0503884	0
Adam2	-0.0372904	0	0
Adam20	0	0	0
Adam21	-0.0959306	-0.0563228	-0.190532
Adam22	0.0702584	-0.327598	0.208781
Adam23	-0.0118741	-1.19612	-1.20472
Adam24	0	0	0
Adam25	0	0	0
Adam26a	0	0	0
Adam26b	0	0	0
Adam28	0	0	0
Adam29	0	0	0
Adam3	-0.0351674	0	0
Adam30	-0.226113	-0.0116933	-0.226534
Adam32	0.0398668	0.0276242	0.59578
Adam33	0.0529999	0.0748219	0.0397829
Adam34	0	0	0
Adam39	0	0	0
Adam4	-0.37879	-0.169169	-0.641305
Adam5	0.0961895	0.0360476	0.13462
Adam6a	0	0	0
[truncated: 22,404 more rows]
