# Supplementary material for: ZFTA–RELA Dictates Oncogenic Transcriptional Programs to Drive Aggressive Supratentorial Ependymoma
Source: Oxford University Press journal article supplement (doi:10.1158/2159-8290.cd-20-1066), 2021-03-19
Supplement: 21598290cd201066-sup-247687_2_supp_6956002_qpb2vg.xlsx [file 21598290cd201066-sup-247687_2_supp_6956002_qpb2vg.xlsx]

## Sheet: HA-CRFUS1 SEs
Supplementary Table S7
Description: Super enhancers detected in IUE ZRFUS1 model
SE_REGION_ID	CHROM	START	STOP	NUM_LOCI	CONSTITUENT_SIZE	AC_peaks	IgG_peaks	enhancers	OVERLAP_GENES	PROXIMAL_GENES	CLOSEST_GENE	enhancerRank	isSuper
9_M00002_1_Fus1_T_CnR_ac4729_peak_10065_lociStitched	chr15	85634180	85669511	9	6663	67340.9	4759.09	1		Mirlet7c-2,Mirlet7b	Mirlet7c-2	1	1
7_M00002_1_Fus1_T_CnR_ac4729_peak_15379_lociStitched	chr2	77908021	77934352	7	4002	110427	53215	2	Cwc22		Cwc22	2	1
11_M00002_1_Fus1_T_CnR_ac4729_peak_23587_lociStitched	chr6	91688545	91755367	11	7144	64155.8	10163.6	3	Slc6a6		Slc6a6	3	1
15_M00002_1_Fus1_T_CnR_ac4729_peak_16554_lociStitched	chr2	167697856	167801045	15	10271	68651.6	18233.5	4		Tmem189,Cebpb,A530013C23Rik	A530013C23Rik	4	1
8_M00002_1_Fus1_T_CnR_ac4729_peak_6518_lociStitched	chr12	109389320	109450602	8	7831	57519.3	8726.56	5		Dlk1	Dlk1	5	1
4_M00002_1_Fus1_T_CnR_ac4729_peak_25931_lociStitched	chr7	142511373	142539333	4	6370	51424	3618.02	6	Mrpl23,Tnnt3	Lsp1,Tnnt3,Gm14492,Nctc1,Mir675,H19	Mrpl23	6	1
8_M00002_1_Fus1_T_CnR_ac4729_peak_13638_lociStitched	chr19	10229147	10277493	8	6497	51720.6	7861.06	7	Myrf,Dagla	Tmem258,Fads1,Fen1	Myrf	7	1
9_M00002_1_Fus1_T_CnR_ac4729_peak_28715_lociStitched	chr9	107697750	107736688	9	5752	48364.9	5587.6	8	Sema3f	Slc38a3,Gnat1,Rbm5	Sema3f	8	1
6_M00002_1_Fus1_T_CnR_ac4729_peak_9849_lociStitched	chr15	77798005	77831708	6	4313	46028.2	4890.31	9	Myh9	Apol8	Myh9	9	1
5_M00002_1_Fus1_T_CnR_ac4729_peak_17652_lociStitched	chr3	80050318	80080415	5	4643	44086.1	4899.79	10			Fam198b	10	1
10_M00002_1_Fus1_T_CnR_ac4729_peak_13311_lociStitched	chr18	75434155	75465841	10	5820	42928.2	4458.22	11	Ctif	Gm10532	Gm10532	11	1
14_M00002_1_Fus1_T_CnR_ac4729_peak_607_lociStitched	chr1	73947861	74033947	14	7961	49886.8	12172.6	12	Tns1		6030407O03Rik	12	1
6_M00002_1_Fus1_T_CnR_ac4729_peak_14989_lociStitched	chr2	38504219	38540462	6	5513	43219.8	5780.76	13	Nek6		Nek6	13	1
10_M00002_1_Fus1_T_CnR_ac4729_peak_20690_lociStitched	chr4	154549657	154600443	10	5071	43411.9	6586.94	14	Prdm16	Prdm16,5930403L14Rik	5930403L14Rik	14	1
6_M00002_1_Fus1_T_CnR_ac4729_peak_7325_lociStitched	chr13	56075819	56115652	6	5990	42011.9	5652.3	15	H2afy	H2afy	H2afy	15	1
8_M00002_1_Fus1_T_CnR_ac4729_peak_24534_lociStitched	chr7	28918242	28954181	8	4579	39974.9	4815.83	16	Actn4	Map4k1,Eif3k,Capn12	Actn4	16	1
7_M00002_1_Fus1_T_CnR_ac4729_peak_20680_lociStitched	chr4	154488260	154536483	7	4752	42050.5	6958.58	17	Prdm16		5930403L14Rik	17	1
16_M00002_1_Fus1_T_CnR_ac4729_peak_20718_lociStitched	chr4	155122416	155190934	16	6962	44810.8	9935.11	18	Ski,Morn1	Rer1	Ski	18	1
7_M00002_1_Fus1_T_CnR_ac4729_peak_6580_lociStitched	chr12	112154552	112182638	7	4234	38104.3	4207.28	19	Kif26a	Mir3073,Aspg,Mir203	Kif26a	19	1
7_M00002_1_Fus1_T_CnR_ac4729_peak_14427_lociStitched	chr2	13358336	13422822	7	7383	42547.9	9324.68	20	Cubn		Cubn	20	1
9_M00002_1_Fus1_T_CnR_ac4729_peak_8297_lociStitched	chr14	25725365	25766667	9	5323	36292.1	5212.31	21	Zcchc24	Ppif,Ppifos	Zcchc24	21	1
7_M00002_1_Fus1_T_CnR_ac4729_peak_27359_lociStitched	chr8	122224071	122266552	7	5894	37132.6	6482.6	22		Zfpm1	Zfpm1	22	1
10_M00002_1_Fus1_T_CnR_ac4729_peak_4719_lociStitched	chr11	88582546	88635289	10	6469	37400.1	7014.82	23	Msi2		Msi2	23	1
10_M00002_1_Fus1_T_CnR_ac4729_peak_23148_lociStitched	chr6	50372842	50427929	10	7895	35878.2	7326.57	24	Osbpl3		Osbpl3	24	1
6_M00002_1_Fus1_T_CnR_ac4729_peak_13131_lociStitched	chr18	61609918	61635347	6	4169	30614	3557.52	25		Gm20748,Mir145,Mir143,Mir143hg	Gm20748	25	1
10_M00002_1_Fus1_T_CnR_ac4729_peak_17004_lociStitched	chr3	27649193	27696200	10	4505	34808.7	7817.26	26	Fndc3b		Fndc3b	26	1
5_M00002_1_Fus1_T_CnR_ac4729_peak_18407_lociStitched	chr3	126599763	126639697	5	3967	32670	6181.78	27	Camk2d	Camk2d	Camk2d	27	1
6_M00002_1_Fus1_T_CnR_ac4729_peak_19251_lociStitched	chr4	45489620	45514343	6	4157	29299.2	3775.2	28	Shb		Shb	28	1
7_M00002_1_Fus1_T_CnR_ac4729_peak_4851_lociStitched	chr11	97415293	97442495	7	4455	28804.2	3778.36	29		Arhgap23	Arhgap23	29	1
5_M00002_1_Fus1_T_CnR_ac4729_peak_23540_lociStitched	chr6	90688918	90711872	5	3092	28538.7	3599.19	30	Iqsec1		Iqsec1	30	1
7_M00002_1_Fus1_T_CnR_ac4729_peak_10734_lociStitched	chr16	32660324	32683607	7	4951	27660.2	2884.76	31	Gm10818,Tnk2		Gm10818	31	1
4_M00002_1_Fus1_T_CnR_ac4729_peak_21538_lociStitched	chr5	67797723	67824254	4	3582	27716.9	3082.9	32	Atp8a1		Atp8a1	32	1
6_M00002_1_Fus1_T_CnR_ac4729_peak_6107_lociStitched	chr12	80203336	80231095	6	4540	28453	4013.95	33	Actn1		Actn1	33	1
7_M00002_1_Fus1_T_CnR_ac4729_peak_4711_lociStitched	chr11	88515326	88556240	7	3853	29163.5	4823.76	34	Msi2		Msi2	34	1
6_M00002_1_Fus1_T_CnR_ac4729_peak_18793_lociStitched	chr3	152468315	152497691	6	5978	29558.1	5367	35	Ak5		Zzz3	35	1
5_M00002_1_Fus1_T_CnR_ac4729_peak_2863_lociStitched	chr10	81129142	81152707	5	3736	28160.2	4013.12	36	Zbtb7a	Snord37,Creb3l3,2310050B05Rik,Nmrk2,Eef2,Pias4,Map2k2,Dapk3	Zbtb7a	36	1
9_M00002_1_Fus1_T_CnR_ac4729_peak_22972_lociStitched	chr6	34492439	34544096	9	4806	30668.8	6570.77	37	Bpgm		Bpgm	37	1
7_M00002_1_Fus1_T_CnR_ac4729_peak_24220_lociStitched	chr6	144754138	144794130	7	5568	29542.1	5778.84	38			4933425H06Rik	38	1
7_M00002_1_Fus1_T_CnR_ac4729_peak_13258_lociStitched	chr18	69596104	69637161	7	4488	27142.8	4725.66	39	Tcf4		Tcf4	39	1
7_M00002_1_Fus1_T_CnR_ac4729_peak_15202_lociStitched	chr2	60797343	60836686	7	4452	27292.2	5075.25	40	Rbms1		Rbms1	40	1
6_M00002_1_Fus1_T_CnR_ac4729_peak_4193_lociStitched	chr11	60105428	60142630	6	4104	26848.7	4888.34	41	Rai1		Rai1	41	1
7_M00002_1_Fus1_T_CnR_ac4729_peak_4466_lociStitched	chr11	76267708	76293011	7	2956	24781.8	3173	42	Nxn	Rnmtl1,Glod4	Rnmtl1	42	1
8_M00002_1_Fus1_T_CnR_ac4729_peak_6265_lociStitched	chr12	86800248	86837058	8	5393	26540	5204.93	43		Irf2bpl	Irf2bpl	43	1
3_M00002_1_Fus1_T_CnR_ac4729_peak_28529_lociStitched	chr9	91122872	91130743	3	1793	21775.9	927.991	44			Zic1	44	1
4_M00002_1_Fus1_T_CnR_ac4729_peak_5413_lociStitched	chr12	8774123	8798951	4	3864	24393.5	3565.3	45	Sdc1		Sdc1	45	1
7_M00002_1_Fus1_T_CnR_ac4729_peak_16633_lociStitched	chr2	170307646	170345544	7	4596	26581.7	5862.82	46		1700040N02Rik	1700040N02Rik	46	1
5_M00002_1_Fus1_T_CnR_ac4729_peak_13969_lociStitched	chr19	38004215	38038737	5	5546	25342.6	4646.66	47	Myof	Cep55	Myof	47	1
3_M00002_1_Fus1_T_CnR_ac4729_peak_14641_lociStitched	chr2	27858004	27877194	3	2631	23329.3	3254.62	48		Col5a1	Col5a1	48	1
2_M00002_1_Fus1_T_CnR_ac4729_peak_25928_lociStitched	chr7	142481043	142487600	2	2210	21142.4	1205.18	49	Lsp1	Syt8,Tnnt3,Gm14492,Mrpl23,Lsp1,Tnni2	Lsp1	49	1
5_M00002_1_Fus1_T_CnR_ac4729_peak_9081_lociStitched	chr14	122432311	122469102	5	3954	24344.6	4506.9	50	Gm5089,Zic5	2610035F20Rik,Zic2	Gm5089	50	1
8_M00002_1_Fus1_T_CnR_ac4729_peak_10699_lociStitched	chr16	30973226	31019814	8	5535	26201.1	6550.27	51	Mir1195,AI480653		AI480653	51	1
5_M00002_1_Fus1_T_CnR_ac4729_peak_24230_lociStitched	chr6	144927629	144945747	5	4122	22457.3	2993.09	52			Bcat1	52	1
5_M00002_1_Fus1_T_CnR_ac4729_peak_27760_lociStitched	chr9	35316297	35343262	5	4201	23289.7	3882.96	53		Rpusd4,4933422A05Rik,Fam118b	4933422A05Rik	53	1
6_M00002_1_Fus1_T_CnR_ac4729_peak_28703_lociStitched	chr9	107602192	107630521	6	3010	23099.5	3776.26	54	Sema3b,Gnai2	Slc38a3,Rassf1,Ifrd2,Tusc2,Nat6,Hyal1,Gnat1,Hyal2,Hyal3	Sema3b	54	1
7_M00002_1_Fus1_T_CnR_ac4729_peak_23818_lociStitched	chr6	113644604	113677580	7	3646	23485.5	4412.19	55	Irak2	Irak2,Brk1,Vhl,Ghrl,Tatdn2,Fancd2os	Irak2	55	1
2_M00002_1_Fus1_T_CnR_ac4729_peak_14876_lociStitched	chr2	33629551	33643976	2	2168	21776	2710.46	56	Lmx1b,C130021I20Rik		Lmx1b	56	1
4_M00002_1_Fus1_T_CnR_ac4729_peak_16468_lociStitched	chr2	165263930	165277371	4	3228	20966.6	1989.27	57	Slc35c2	Slc35c2,Cdh22,Elmo2	Slc35c2	57	1
8_M00002_1_Fus1_T_CnR_ac4729_peak_11738_lociStitched	chr17	31808164	31846863	8	3750	24314.6	5491.39	58	Sik1		Sik1	58	1
5_M00002_1_Fus1_T_CnR_ac4729_peak_14204_lociStitched	chr19	55743200	55754523	5	2337	20242.1	1555.78	59	Tcf7l2	4930552P12Rik,Tcf7l2	Tcf7l2	59	1
6_M00002_1_Fus1_T_CnR_ac4729_peak_19920_lociStitched	chr4	114577988	114614731	6	4356	23930.7	5272.62	60	Trabd2b		Trabd2b	60	1
10_M00002_1_Fus1_T_CnR_ac4729_peak_3608_lociStitched	chr11	11820475	11879205	10	5347	26810.2	8186.96	61	Ddc,1700042O10Rik	Fignl1	1700042O10Rik	61	1
4_M00002_1_Fus1_T_CnR_ac4729_peak_6567_lociStitched	chr12	111681409	111695337	4	4200	20763.9	2161.63	62	Trmt61a	Trmt61a,Apopt1,Bag5,Ckb	Trmt61a	62	1
5_M00002_1_Fus1_T_CnR_ac4729_peak_2506_lociStitched	chr10	59899234	59920972	5	3037	21494.5	2917.24	63		Dnajb12,Ddit4	Dnajb12	63	1
8_M00002_1_Fus1_T_CnR_ac4729_peak_10875_lociStitched	chr16	44494272	44542806	8	5104	23432.2	5028.12	64	Boc	Mir3081	Mir3081	64	1
5_M00002_1_Fus1_T_CnR_ac4729_peak_4872_lociStitched	chr11	98047715	98065960	5	3727	21308.3	3043.27	65	Stac2	Cacnb1,Rpl19	Stac2	65	1
4_M00002_1_Fus1_T_CnR_ac4729_peak_9246_lociStitched	chr15	27919763	27944108	4	3269	21788.8	3537.33	66	Trio		Trio	66	1
7_M00002_1_Fus1_T_CnR_ac4729_peak_23521_lociStitched	chr6	89320114	89361251	7	4809	24867.3	6676.54	67	Plxna1		Plxna1	67	1
5_M00002_1_Fus1_T_CnR_ac4729_peak_22975_lociStitched	chr6	34598062	34623159	5	3370	21430.3	3272.65	68			Cald1	68	1
6_M00002_1_Fus1_T_CnR_ac4729_peak_5209_lociStitched	chr11	117248670	117280679	6	3940	22409.5	4426.84	69	2020-09-09		2020-09-09	69	1
4_M00002_1_Fus1_T_CnR_ac4729_peak_3497_lociStitched	chr11	4296824	4309782	4	4337	19991.6	2241.73	70		Lif	Lif	70	1
4_M00002_1_Fus1_T_CnR_ac4729_peak_25788_lociStitched	chr7	132754088	132780949	4	3318	21236.3	3787.4	71	Fam53b		Fam53b	71	1
3_M00002_1_Fus1_T_CnR_ac4729_peak_16321_lociStitched	chr2	156644589	156668651	3	3298	20727	3371.09	72	Dlgap4	Gm14169	Dlgap4	72	1
5_M00002_1_Fus1_T_CnR_ac4729_peak_20402_lociStitched	chr4	139227659	139250399	5	2590	20347.8	3065.35	73	Capzb	Gm16287	Capzb	73	1
4_M00002_1_Fus1_T_CnR_ac4729_peak_26847_lociStitched	chr8	87929149	87944560	4	2419	18958.6	1707.54	74	Zfp423		Zfp423	74	1
6_M00002_1_Fus1_T_CnR_ac4729_peak_21913_lociStitched	chr5	107087041	107120377	6	4084	21821.7	4637.04	75	Tgfbr3		Cdc7	75	1
4_M00002_1_Fus1_T_CnR_ac4729_peak_20638_lociStitched	chr4	152070343	152087754	4	3622	19928.6	2799.69	76		Plekhg5,Espn,Tnfrsf25,Zbtb48,Tas1r1,Nol9	Plekhg5	76	1
6_M00002_1_Fus1_T_CnR_ac4729_peak_12136_lociStitched	chr17	70720005	70755665	6	5210	21474.5	4382.61	77	Dlgap1		Tgif1	77	1
4_M00002_1_Fus1_T_CnR_ac4729_peak_10182_lociStitched	chr15	97772844	97789393	4	4001	19671.8	2743.82	78	Slc48a1	Endou,Rapgef3,Hdac7	Slc48a1	78	1
5_M00002_1_Fus1_T_CnR_ac4729_peak_8278_lociStitched	chr14	25501887	25527957	5	2948	20730.9	3876.61	79	Zmiz1	Mir3075	Mir3075	79	1
6_M00002_1_Fus1_T_CnR_ac4729_peak_9637_lociStitched	chr15	62106749	62152278	6	4629	22391.2	5754.87	80	Pvt1		H2afy3	80	1
4_M00002_1_Fus1_T_CnR_ac4729_peak_16592_lociStitched	chr2	168150216	168170756	4	4691	19823.2	3249.43	81	E130018N17Rik	Adnp	E130018N17Rik	81	1
3_M00002_1_Fus1_T_CnR_ac4729_peak_15529_lociStitched	chr2	92987536	93014953	3	3421	19937.6	3421.64	82	Prdm11		Prdm11	82	1
5_M00002_1_Fus1_T_CnR_ac4729_peak_27725_lociStitched	chr9	32709791	32730761	5	2538	19458.1	2981.93	83	Ets1	Ets1	Ets1	83	1
5_M00002_1_Fus1_T_CnR_ac4729_peak_27342_lociStitched	chr8	121878203	121904389	5	3119	20063.7	3642.47	84	Slc7a5	BC048644,Banp,Klhdc4,Car5a	Slc7a5	84	1
5_M00002_1_Fus1_T_CnR_ac4729_peak_18413_lociStitched	chr3	126686057	126699938	5	2698	18411.8	1991.92	85	Camk2d		Camk2d	85	1
3_M00002_1_Fus1_T_CnR_ac4729_peak_905_lociStitched	chr1	91054812	91066994	3	1721	18316.9	1941.81	86	Lrrfip1		Lrrfip1	86	1
3_M00002_1_Fus1_T_CnR_ac4729_peak_3906_lociStitched	chr11	35932487	35948717	3	2790	18102.9	1777.18	87	Wwc1		Wwc1	87	1
3_M00002_1_Fus1_T_CnR_ac4729_peak_28346_lociStitched	chr9	72635219	72653834	3	2673	18469.8	2183.54	88		Nedd4	Nedd4	88	1
3_M00002_1_Fus1_T_CnR_ac4729_peak_13306_lociStitched	chr18	75377826	75391684	3	1371	18432.5	2225.59	89	Smad7		Smad7	89	1
6_M00002_1_Fus1_T_CnR_ac4729_peak_22726_lociStitched	chr6	5082057	5110286	6	3575	19557.1	3401.59	90	Ppp1r9a		Pon1	90	1
2_M00002_1_Fus1_T_CnR_ac4729_peak_13323_lociStitched	chr18	75494457	75504116	2	2930	17259.7	1209.31	91	Ctif	Gm10532	Gm10532	91	1
4_M00002_1_Fus1_T_CnR_ac4729_peak_22451_lociStitched	chr5	139718887	139742933	4	3075	19436.4	3453.01	92	Micall2	Ints1,Mafk	Micall2	92	1
5_M00002_1_Fus1_T_CnR_ac4729_peak_28184_lociStitched	chr9	63959692	63980640	5	3359	19031.3	3070.98	93	Smad6		Smad6	93	1
8_M00002_1_Fus1_T_CnR_ac4729_peak_21750_lociStitched	chr5	93103639	93152125	8	3579	22119.3	6240.15	94	2020-09-11		2020-09-11	94	1
4_M00002_1_Fus1_T_CnR_ac4729_peak_5156_lociStitched	chr11	115946317	115962051	4	1906	17943.1	2142.97	95	Sap30bp	Smim6,Itgb4,Recql5,Smim5	Sap30bp	95	1
6_M00002_1_Fus1_T_CnR_ac4729_peak_9073_lociStitched	chr14	122368768	122389094	6	3406	18366.6	2581.4	96	Gm5089,Clybl		Gm5089	96	1
6_M00002_1_Fus1_T_CnR_ac4729_peak_6588_lociStitched	chr12	112265124	112296240	6	3522	20262.7	4586.5	97			Kif26a	97	1
5_M00002_1_Fus1_T_CnR_ac4729_peak_12976_lociStitched	chr18	50046370	50065125	5	2810	17980.4	2344.38	98	Tnfaip8		Tnfaip8	98	1
3_M00002_1_Fus1_T_CnR_ac4729_peak_22986_lociStitched	chr6	34870643	34887810	3	4370	18396.2	2777.62	99	Wdr91,3110062M04Rik,Tmem140	Stra8,3110062M04Rik	3110062M04Rik	99	1
5_M00002_1_Fus1_T_CnR_ac4729_peak_22466_lociStitched	chr5	139950031	139970906	5	3448	18424.3	3181.35	100	Elfn1		Elfn1	100	1
4_M00002_1_Fus1_T_CnR_ac4729_peak_17767_lociStitched	chr3	87149881	87165804	4	3432	17770.1	2541.31	101	Kirrel	Kirrel	Kirrel	101	1
5_M00002_1_Fus1_T_CnR_ac4729_peak_20421_lociStitched	chr4	139580242	139602776	5	4039	18599.6	3375.59	102	Iffo2	Aldh4a1	Iffo2	102	1
4_M00002_1_Fus1_T_CnR_ac4729_peak_14637_lociStitched	chr2	27829244	27838494	4	2626	16311.5	1133.12	103		Col5a1	Col5a1	103	1
5_M00002_1_Fus1_T_CnR_ac4729_peak_3398_lociStitched	chr10	127591050	127616282	5	3094	19163.7	3996.75	104	Lrp1	Stat6	Lrp1	104	1
4_M00002_1_Fus1_T_CnR_ac4729_peak_4471_lociStitched	chr11	76305518	76327246	4	1453	18006	2887.65	105	Nxn		Rnmtl1	105	1
5_M00002_1_Fus1_T_CnR_ac4729_peak_17642_lociStitched	chr3	79903585	79937036	5	2054	20097.4	5094.59	106	Fam198b		Fam198b	106	1
5_M00002_1_Fus1_T_CnR_ac4729_peak_8046_lociStitched	chr14	7822703	7848899	5	2899	18504.9	3557.42	107	Flnb		Flnb	107	1
5_M00002_1_Fus1_T_CnR_ac4729_peak_11908_lociStitched	chr17	45867179	45896488	5	2827	19045	4117.91	108			Vegfa	108	1
3_M00002_1_Fus1_T_CnR_ac4729_peak_4260_lociStitched	chr11	62966335	62982174	3	3605	16790.9	2049.57	109	Cdrt4		Cdrt4	109	1
5_M00002_1_Fus1_T_CnR_ac4729_peak_16788_lociStitched	chr2	180435307	180457304	5	3328	18488.5	3812.08	110		Slco4a1,Gm6307,Mir1a-1,Mir133a-2,Ntsr1,B230312C02Rik	Slco4a1	110	1
2_M00002_1_Fus1_T_CnR_ac4729_peak_17809_lociStitched	chr3	88526187	88540701	2	3021	17222.3	2656.06	111	Mir1905,Mex3a	Ubqln4,Lmna,Ssr2,Rab25,Lamtor2	Mex3a	111	1
3_M00002_1_Fus1_T_CnR_ac4729_peak_27125_lociStitched	chr8	108695660	108702001	3	2029	15359.2	852.23	112		Mir466g,Zfhx3	Zfhx3	112	1
4_M00002_1_Fus1_T_CnR_ac4729_peak_9045_lociStitched	chr14	121172048	121206010	4	4120	18533.1	4156.95	113	Farp1		Farp1	113	1
3_M00002_1_Fus1_T_CnR_ac4729_peak_25331_lociStitched	chr7	100904613	100923830	3	2664	17126.2	2865.25	114	Arhgef17	Relt,P2ry6,Mir3102	Arhgef17	114	1
4_M00002_1_Fus1_T_CnR_ac4729_peak_13094_lociStitched	chr18	60747347	60763184	4	3865	16362.8	2215.6	115		Cd74,Ndst1,Rps14,Mir5107	Rps14	115	1
5_M00002_1_Fus1_T_CnR_ac4729_peak_6480_lociStitched	chr12	108202935	108223862	5	3096	17570.3	3429.94	116	Ccnk,Ccdc85c	Setd3	Ccnk	116	1
7_M00002_1_Fus1_T_CnR_ac4729_peak_2631_lociStitched	chr10	68127759	68166773	7	4123	19105.2	4982.09	117	Arid5b		Arid5b	117	1
7_M00002_1_Fus1_T_CnR_ac4729_peak_5294_lociStitched	chr11	119799533	119827118	7	4970	17428.2	3409.51	118	Rptor,A430071A18Rik		A430071A18Rik	118	1
3_M00002_1_Fus1_T_CnR_ac4729_peak_16913_lociStitched	chr3	19953549	19960910	3	2760	15124.6	1166.72	119	Cp		Cp	119	1
3_M00002_1_Fus1_T_CnR_ac4729_peak_28519_lociStitched	chr9	90691313	90697914	3	1833	14602.7	647.558	120			Tbc1d2b	120	1
5_M00002_1_Fus1_T_CnR_ac4729_peak_14937_lociStitched	chr2	35672122	35700940	5	2769	18276.4	4371.69	121	Dab2ip		Dab2ip	121	1
3_M00002_1_Fus1_T_CnR_ac4729_peak_4261_lociStitched	chr11	62995861	63005022	3	2242	15309.9	1405.3	122		Cdrt4	Cdrt4	122	1
3_M00002_1_Fus1_T_CnR_ac4729_peak_23547_lociStitched	chr6	90760716	90772026	3	3008	15346.5	1565.3	123	Iqsec1	Iqsec1	Iqsec1	123	1
4_M00002_1_Fus1_T_CnR_ac4729_peak_575_lociStitched	chr1	72738989	72761397	4	3144	16729.8	2955.62	124		Ankar,Rpl37a	Rpl37a	124	1
7_M00002_1_Fus1_T_CnR_ac4729_peak_19562_lociStitched	chr4	82400428	82444614	7	2849	19229.7	5514.41	125	Nfib		Nfib	125	1
5_M00002_1_Fus1_T_CnR_ac4729_peak_26548_lociStitched	chr8	68171178	68192382	5	2860	16390.7	2682.31	126			Sh2d4a	126	1
4_M00002_1_Fus1_T_CnR_ac4729_peak_16036_lociStitched	chr2	135711517	135738233	4	3107	16873.8	3171.19	127		Plcb4	Plcb4	127	1
2_M00002_1_Fus1_T_CnR_ac4729_peak_9764_lociStitched	chr15	74988370	75000585	2	2419	16189.8	2516.29	128	Ly6a	Ly6e,Ly6c1,Ly6i	Ly6a	128	1
5_M00002_1_Fus1_T_CnR_ac4729_peak_27197_lociStitched	chr8	111700755	111727308	5	4295	17801.1	4136.96	129	Bcar1	Ctrb1	Bcar1	129	1
6_M00002_1_Fus1_T_CnR_ac4729_peak_6067_lociStitched	chr12	79503797	79536203	6	3273	16977.5	3454.48	130	Rad51b		Rad51b	130	1
3_M00002_1_Fus1_T_CnR_ac4729_peak_9242_lociStitched	chr15	27772049	27793943	3	2364	16525.6	3060.78	131	Trio		Fam105a	131	1
3_M00002_1_Fus1_T_CnR_ac4729_peak_4032_lociStitched	chr11	51410959	51432233	3	2224	16457.6	3035.8	132	Col23a1		Col23a1	132	1
4_M00002_1_Fus1_T_CnR_ac4729_peak_20776_lociStitched	chr4_GL456350_random	173634	205640	4	3481	16483.1	3094.98	133	Gm13308,Gm20878		Gm13308	133	1
4_M00002_1_Fus1_T_CnR_ac4729_peak_16568_lociStitched	chr2	167814734	167834786	4	3185	16651.2	3314.6	134			Ptpn1	134	1
7_M00002_1_Fus1_T_CnR_ac4729_peak_1091_lociStitched	chr1	131184223	131213871	7	4867	16816.3	3531.08	135	Rassf5	Eif2d,Dyrk3	Eif2d	135	1
5_M00002_1_Fus1_T_CnR_ac4729_peak_6831_lociStitched	chr13	15691325	15723028	5	3467	17455.7	4197.48	136	Gli3		4933412O06Rik	136	1
5_M00002_1_Fus1_T_CnR_ac4729_peak_15580_lociStitched	chr2	101967061	101987440	5	3159	15459.5	2272.26	137	Ldlrad3		Commd9	137	1
3_M00002_1_Fus1_T_CnR_ac4729_peak_27160_lociStitched	chr8	110653969	110673257	3	2636	15530.7	2463.08	138	Vac14	Mtss1l	Vac14	138	1
5_M00002_1_Fus1_T_CnR_ac4729_peak_17313_lociStitched	chr3	53043874	53072792	5	3024	16992.2	3987.79	139	Lhfp	Cog6	Lhfp	139	1
5_M00002_1_Fus1_T_CnR_ac4729_peak_18476_lociStitched	chr3	130922768	130946795	5	4994	16862.1	3892.37	140			Lef1	140	1
3_M00002_1_Fus1_T_CnR_ac4729_peak_14229_lociStitched	chr19	56929591	56946153	3	2385	14871	1904.63	141	Afap1l2		Vwa2	141	1
5_M00002_1_Fus1_T_CnR_ac4729_peak_22253_lociStitched	chr5	125125257	125152313	5	3855	17410.5	4450.71	142	Ncor2		Ncor2	142	1
7_M00002_1_Fus1_T_CnR_ac4729_peak_5321_lociStitched	chr11	120242537	120280489	7	3485	19150.6	6337.98	143	Bahcc1		Bahcc1	143	1
10_M00002_1_Fus1_T_CnR_ac4729_peak_2115_lociStitched	chr10	22194751	22224616	10	4218	18934.4	6128.3	144	Raet1c,Raet1a,Raet1b	Raet1e,H60b,E030030I06Rik	Raet1c	144	1
3_M00002_1_Fus1_T_CnR_ac4729_peak_2836_lociStitched	chr10	80664162	80686010	3	3343	16213.4	3504.42	145	Mob3a,Mknk2	Izumo4,Csnk1g2,Btbd2	Mknk2	145	1
2_M00002_1_Fus1_T_CnR_ac4729_peak_7614_lociStitched	chr13	83718901	83726676	2	2098	13501.3	800.825	146		C130071C03Rik,Mir9-2	C130071C03Rik	146	1
7_M00002_1_Fus1_T_CnR_ac4729_peak_6966_lociStitched	chr13	28782486	28812462	7	3475	16981.4	4352.52	147	2610307P16Rik		2610307P16Rik	147	1
3_M00002_1_Fus1_T_CnR_ac4729_peak_3091_lociStitched	chr10	94532424	94552732	3	3353	15541.7	3048.23	148	Tmcc3	Tmcc3	Tmcc3	148	1
5_M00002_1_Fus1_T_CnR_ac4729_peak_14819_lociStitched	chr2	32411200	32440555	5	3324	16914.4	4538.28	149	Slc25a25	Ptges2,1110008P14Rik,Ciz1,Naif1,Lcn2,Slc25a25	Slc25a25	149	1
2_M00002_1_Fus1_T_CnR_ac4729_peak_26880_lociStitched	chr8	89037079	89040646	2	1641	12796.3	541.471	150	Sall1		Sall1	150	1
4_M00002_1_Fus1_T_CnR_ac4729_peak_16688_lociStitched	chr2	173236572	173258126	4	1964	15421.9	3170.59	151	Pmepa1	Zbp1	Zbp1	151	1
6_M00002_1_Fus1_T_CnR_ac4729_peak_21298_lociStitched	chr5	35921510	35944046	6	3137	15272.6	3044.61	152	Afap1		Afap1	152	1
3_M00002_1_Fus1_T_CnR_ac4729_peak_2853_lociStitched	chr10	80955590	80972551	3	2053	14569.5	2345.71	153	Gng7	Lmnb2,Gadd45b	Gadd45b	153	1
3_M00002_1_Fus1_T_CnR_ac4729_peak_17669_lociStitched	chr3	80878704	80894731	3	2285	14826.6	2623.62	154	Glrb		Glrb	154	1
4_M00002_1_Fus1_T_CnR_ac4729_peak_5303_lociStitched	chr11	119844505	119871683	4	3643	16285.1	4101.16	155	Rptor	Chmp6,A430071A18Rik	A430071A18Rik	155	1
3_M00002_1_Fus1_T_CnR_ac4729_peak_3040_lociStitched	chr10	92151492	92162760	3	1781	13557.7	1375.82	156	Rmst	Mir1251	Rmst	156	1
3_M00002_1_Fus1_T_CnR_ac4729_peak_22265_lociStitched	chr5	125382923	125406973	3	3260	16272.2	4110.15	157	Ubc	Dhx37,Scarb1,Bri3bp	Ubc	157	1
4_M00002_1_Fus1_T_CnR_ac4729_peak_20783_lociStitched	chr4_JH584293_random	17070	53955	4	3073	16609.3	4474.15	158	LOC100861978,Gm2506,Il11ra2		LOC100861978	158	1
5_M00002_1_Fus1_T_CnR_ac4729_peak_19178_lociStitched	chr4	42262548	42294679	5	4044	16026.9	3948.9	159	Gm13308,4933409K07Rik,Gm21586		Gm2002	159	1
4_M00002_1_Fus1_T_CnR_ac4729_peak_6097_lociStitched	chr12	80013351	80023599	4	2479	13506.9	1477.76	160			Zfp36l1	160	1
6_M00002_1_Fus1_T_CnR_ac4729_peak_19735_lociStitched	chr4	97771848	97797132	6	2753	14920.1	2930.42	161	Nfia		Nfia	161	1
3_M00002_1_Fus1_T_CnR_ac4729_peak_17065_lociStitched	chr3	30943680	30960906	3	2776	14841.9	2864.68	162	Phc3	Prkci,Phc3	Phc3	162	1
3_M00002_1_Fus1_T_CnR_ac4729_peak_18014_lociStitched	chr3	99233245	99249530	3	3956	14602.8	2646.31	163		Tbx15	Tbx15	163	1
2_M00002_1_Fus1_T_CnR_ac4729_peak_2723_lociStitched	chr10	77116611	77131008	2	2783	14179.6	2300.64	164	Col18a1	Col18a1	Col18a1	164	1
3_M00002_1_Fus1_T_CnR_ac4729_peak_4781_lociStitched	chr11	94866719	94882269	3	2958	14231.4	2371.38	165		Gm11544	Gm11544	165	1
5_M00002_1_Fus1_T_CnR_ac4729_peak_5935_lociStitched	chr12	70695664	70730765	5	3613	16297.4	4440.28	166			Frmd6	166	1
3_M00002_1_Fus1_T_CnR_ac4729_peak_1474_lociStitched	chr1	163280069	163292427	3	2204	13429.4	1573.17	167	Prrx1		Prrx1	167	1
4_M00002_1_Fus1_T_CnR_ac4729_peak_21091_lociStitched	chr5	26050770	26079441	4	3714	16543.2	4724.98	168		Gm10471,Speer4a,5031410I06Rik,Gm10220	Gm10471	168	1
4_M00002_1_Fus1_T_CnR_ac4729_peak_4658_lociStitched	chr11	86576270	86593635	4	2149	13895.5	2087.27	169	Mir21,Vmp1	Tubd1,Rps6kb1	Mir21	169	1
4_M00002_1_Fus1_T_CnR_ac4729_peak_7232_lociStitched	chr13	49357730	49377264	4	2391	14593.9	2807.04	170	Bicd2	Bicd2,Fgd3,Ippk	Bicd2	170	1
2_M00002_1_Fus1_T_CnR_ac4729_peak_2729_lociStitched	chr10	77206368	77213290	2	2349	12904.7	1124.13	171		Col18a1,Pofut2,Gm10941	Col18a1	171	1
3_M00002_1_Fus1_T_CnR_ac4729_peak_24902_lociStitched	chr7	68128424	68134521	3	1672	12439.7	781.026	172	Igf1r		Pgpep1l	172	1
3_M00002_1_Fus1_T_CnR_ac4729_peak_19159_lociStitched	chr4	41910506	41934445	3	2837	14641.1	3006.74	173	Gm3893	Ccl21c,Ccl21b,Gm13308,Gm13298	Ccl21b	173	1
5_M00002_1_Fus1_T_CnR_ac4729_peak_25780_lociStitched	chr7	132714083	132736499	5	4005	14680.2	3120.31	174	Fam53b		Fam53b	174	1
3_M00002_1_Fus1_T_CnR_ac4729_peak_21215_lociStitched	chr5	33691927	33706765	3	3540	13581.2	2046.16	175		Tmem129,Tacc3,Fgfr3,Slbp	Fgfr3	175	1
5_M00002_1_Fus1_T_CnR_ac4729_peak_19744_lociStitched	chr4	97817985	97848319	5	2180	15391.5	3873.65	176	Nfia		Nfia	176	1
5_M00002_1_Fus1_T_CnR_ac4729_peak_4665_lociStitched	chr11	86622129	86651249	5	3239	14714.3	3197.38	177	Vmp1	Ptrh2,Mir21	Vmp1	177	1
6_M00002_1_Fus1_T_CnR_ac4729_peak_24969_lociStitched	chr7	73584386	73619258	6	4213	15845.8	4345.05	178		Chd2,1810026B05Rik	1810026B05Rik	178	1
4_M00002_1_Fus1_T_CnR_ac4729_peak_6720_lociStitched	chr13	5822285	5846459	4	3201	14025.8	2557.61	179		Klf6,1700016G22Rik	1700016G22Rik	179	1
4_M00002_1_Fus1_T_CnR_ac4729_peak_18914_lociStitched	chr4	9640032	9658018	4	2158	13511.1	2045.01	180	Asph		Asph	180	1
3_M00002_1_Fus1_T_CnR_ac4729_peak_20399_lociStitched	chr4	139206553	139214716	3	1791	12495.9	1149.35	181	Capzb	Capzb,Gm16287	Capzb	181	1
3_M00002_1_Fus1_T_CnR_ac4729_peak_22080_lociStitched	chr5	115530191	115544496	3	2102	13399.5	2112.85	182	Pxn	Sirt4,Rplp0,Gcn1l1	Rplp0	182	1
3_M00002_1_Fus1_T_CnR_ac4729_peak_17120_lociStitched	chr3	34656197	34665148	3	1099	12624.5	1357.87	183	Sox2ot	Sox2,Mir1897	Sox2	183	1
5_M00002_1_Fus1_T_CnR_ac4729_peak_25585_lociStitched	chr7	116268292	116297928	5	4130	14569.1	3316.27	184		Rps13	Rps13	184	1
6_M00002_1_Fus1_T_CnR_ac4729_peak_5377_lociStitched	chr12	3824785	3855861	6	3254	15702.7	4655.18	185	Dnmt3a	Gm10485,Dnmt3a	Gm10485	185	1
4_M00002_1_Fus1_T_CnR_ac4729_peak_4899_lociStitched	chr11	98933031	98963876	4	1549	14999.9	4003.68	186	Rara	Cdc6,Gjd3	Rara	186	1
5_M00002_1_Fus1_T_CnR_ac4729_peak_12423_lociStitched	chr17	88598104	88629716	5	3499	14212.8	3230.75	187	Ston1	Gtf2a1l	Ston1	187	1
4_M00002_1_Fus1_T_CnR_ac4729_peak_27846_lociStitched	chr9	41918520	41951176	4	3243	15501.8	4522.86	188			Sorl1	188	1
3_M00002_1_Fus1_T_CnR_ac4729_peak_22247_lociStitched	chr5	125045209	125056740	3	2378	12806.3	1857.64	189	Ncor2	Fam101a	Fam101a	189	1
3_M00002_1_Fus1_T_CnR_ac4729_peak_2532_lociStitched	chr10	60566659	60579110	3	2056	12651.5	1714.5	190	Cdh23		Cdh23	190	1
5_M00002_1_Fus1_T_CnR_ac4729_peak_18189_lociStitched	chr3	108410677	108433877	5	3917	14511.6	3647.04	191	Sars,Celsr2	Psrc1,Sars,Mybphl,Gm12522	Celsr2	191	1
8_M00002_1_Fus1_T_CnR_ac4729_peak_23355_lociStitched	chr6	82996859	83029596	8	4967	15789.1	4936.74	192	M1ap	Tlx2,Dqx1,Pcgf1,Dok1,Htra2,Aup1,Loxl3	Dok1	192	1
3_M00002_1_Fus1_T_CnR_ac4729_peak_10419_lociStitched	chr16	10999120	11016692	3	2762	13451.4	2607.68	193	Gm4262	Litaf,Snn	Gm4262	193	1
3_M00002_1_Fus1_T_CnR_ac4729_peak_5263_lociStitched	chr11	118851060	118874959	3	3711	14387.2	3575.29	194	Rbfox3		Rbfox3	194	1
5_M00002_1_Fus1_T_CnR_ac4729_peak_16680_lociStitched	chr2	172726726	172756878	5	3262	15850.9	5047.44	195			Tfap2c	195	1
3_M00002_1_Fus1_T_CnR_ac4729_peak_24897_lociStitched	chr7	68062338	68086184	3	2969	13711.5	2916.37	196	Igf1r		Igf1r	196	1
5_M00002_1_Fus1_T_CnR_ac4729_peak_793_lociStitched	chr1	86420891	86448729	5	3938	14715.2	3941.86	197	1700019O17Rik	Nmur1	1700019O17Rik	197	1
3_M00002_1_Fus1_T_CnR_ac4729_peak_20119_lociStitched	chr4	127980967	127987341	3	2377	11598.1	833.719	198		CK137956	CK137956	198	1
2_M00002_1_Fus1_T_CnR_ac4729_peak_12105_lociStitched	chr17	65864173	65872769	2	2683	11660.5	901.72	199	Ralbp1		Ralbp1	199	1
2_M00002_1_Fus1_T_CnR_ac4729_peak_2847_lociStitched	chr10	80857395	80862929	2	2243	11682.8	945.207	200	Sppl2b	Lsm7,Oaz1-ps,Timm13,Jsrp1,Tmprss9,Mir1982,Lingo3,Oaz1	Sppl2b	200	1
3_M00002_1_Fus1_T_CnR_ac4729_peak_17647_lociStitched	chr3	79967277	79990684	3	2909	14577.9	3859.81	201			Fam198b	201	1
3_M00002_1_Fus1_T_CnR_ac4729_peak_20725_lociStitched	chr4	155233360	155246423	3	2777	12603.2	1891.52	202		2610002J02Rik,Ski	2610002J02Rik	202	1
3_M00002_1_Fus1_T_CnR_ac4729_peak_26752_lociStitched	chr8	84191684	84200543	3	2042	11657.6	1024.1	203		Mir181c,Zswim4,Mir181d,4930432K21Rik,D8Ertd738e,Nanos3,Cc2d1a,Mir3074-2,Mir24-2,Mir23a,Mir27a	Mir23a	203	1
3_M00002_1_Fus1_T_CnR_ac4729_peak_8269_lociStitched	chr14	25303850	25318335	3	2520	12810.5	2181.44	204			Zmiz1	204	1
2_M00002_1_Fus1_T_CnR_ac4729_peak_21953_lociStitched	chr5	108696767	108704114	2	1902	11736.1	1146.87	205	Fgfrl1	Idua,Dgkq,Slc26a1	Fgfrl1	205	1
4_M00002_1_Fus1_T_CnR_ac4729_peak_14649_lociStitched	chr2	27916533	27936785	4	1637	13554.7	2966.92	206	Col5a1		Col5a1	206	1
5_M00002_1_Fus1_T_CnR_ac4729_peak_27314_lociStitched	chr8	120416512	120437814	5	3566	13673.8	3120.74	207			Gse1	207	1
4_M00002_1_Fus1_T_CnR_ac4729_peak_197_lociStitched	chr1	35652559	35681539	4	2899	14208.9	3680.46	208			Hs6st1	208	1
4_M00002_1_Fus1_T_CnR_ac4729_peak_11604_lociStitched	chr17	27063169	27084168	4	3812	13181.1	2668.97	209	Itpr3	Ggnbp1,Mnf1,Bak1	Itpr3	209	1
4_M00002_1_Fus1_T_CnR_ac4729_peak_12967_lociStitched	chr18	50004259	50024461	4	2473	12365.6	1911.11	210	Tnfaip8	Tnfaip8	Tnfaip8	210	1
2_M00002_1_Fus1_T_CnR_ac4729_peak_22487_lociStitched	chr5	140549510	140555412	2	2148	11195.5	742.472	211		Chst12,Grifin	Grifin	211	1
3_M00002_1_Fus1_T_CnR_ac4729_peak_27118_lociStitched	chr8	108239757	108245325	3	1563	10918.3	483.859	212			3010033K07Rik	212	1
4_M00002_1_Fus1_T_CnR_ac4729_peak_12687_lociStitched	chr18	21177452	21196616	4	3098	12583.1	2152.12	213	Garem		Garem	213	1
4_M00002_1_Fus1_T_CnR_ac4729_peak_27876_lociStitched	chr9	44071902	44087676	4	1841	12734.4	2307.74	214	Usp2	Mcam,C1qtnf5,Thy1,Rnf26	Usp2	214	1
2_M00002_1_Fus1_T_CnR_ac4729_peak_4882_lociStitched	chr11	98380147	98395802	2	3198	13244.1	2855.47	215	Pnmt,Pgap3,Tcap,Stard3	Ppp1r1b,Erbb2,1700003D09Rik,Mien1	Pnmt	215	1
2_M00002_1_Fus1_T_CnR_ac4729_peak_23314_lociStitched	chr6	72508405	72513856	2	2205	11207.3	825.827	216		Capg	Capg	216	1
5_M00002_1_Fus1_T_CnR_ac4729_peak_20254_lociStitched	chr4	133158641	133198756	5	3578	15235.7	4857.93	217	Wasf2	Cd164l2,Map3k6,Gpr3	Gpr3	217	1
6_M00002_1_Fus1_T_CnR_ac4729_peak_12693_lociStitched	chr18	21224155	21260496	6	4523	14678.1	4310.04	218	Garem		Garem	218	1
3_M00002_1_Fus1_T_CnR_ac4729_peak_28878_lociStitched	chr9	119556686	119569075	3	2135	12087.9	1749.33	219	Scn5a		Scn5a	219	1
5_M00002_1_Fus1_T_CnR_ac4729_peak_27781_lociStitched	chr9	37045918	37071631	5	4066	13787.3	3450.68	220	Pknox2		Pknox2	220	1
6_M00002_1_Fus1_T_CnR_ac4729_peak_4504_lociStitched	chr11	77786068	77816259	6	4218	14056.9	3731.61	221	Myo18a		Myo18a	221	1
4_M00002_1_Fus1_T_CnR_ac4729_peak_14631_lociStitched	chr2	27772051	27784350	4	2750	12333.4	2009.66	222			Rxra	222	1
5_M00002_1_Fus1_T_CnR_ac4729_peak_6443_lociStitched	chr12	105469831	105490654	5	2653	13172.6	2863.16	223	D430019H16Rik	AU015791	D430019H16Rik	223	1
7_M00002_1_Fus1_T_CnR_ac4729_peak_2034_lociStitched	chr10	16994646	17043611	7	4022	15781.4	5474.29	224	Gm20125		Gm20125	224	1
3_M00002_1_Fus1_T_CnR_ac4729_peak_27462_lociStitched	chr8	126826607	126839807	3	2335	11969.8	1673.76	225			Tomm20	225	1
7_M00002_1_Fus1_T_CnR_ac4729_peak_14851_lociStitched	chr2	32882719	32915238	7	2885	15079.1	4809.56	226	Fam129b	Stxbp1,Snora65,Lrsam1,Rpl12	Fam129b	226	1
6_M00002_1_Fus1_T_CnR_ac4729_peak_19837_lociStitched	chr4	106920637	106956765	6	2482	15470	5242.17	227	Ssbp3		Ssbp3	227	1
3_M00002_1_Fus1_T_CnR_ac4729_peak_21495_lociStitched	chr5	64805608	64813049	3	2551	11379.5	1177.17	228	Klf3		Klf3	228	1
4_M00002_1_Fus1_T_CnR_ac4729_peak_20089_lociStitched	chr4	126109897	126132972	4	2511	13258.9	3066.67	229	Stk40	Lsm10,Stk40,Sh3d21,Eva1b	Stk40	229	1
3_M00002_1_Fus1_T_CnR_ac4729_peak_20575_lociStitched	chr4	149557051	149572995	3	3476	12123.8	1945.17	230	Ctnnbip1	Clstn1	Ctnnbip1	230	1
4_M00002_1_Fus1_T_CnR_ac4729_peak_5268_lociStitched	chr11	119078306	119090838	4	2061	12756.3	2624.2	231	Cbx4	Cbx8	Cbx4	231	1
2_M00002_1_Fus1_T_CnR_ac4729_peak_24374_lociStitched	chr7	16432186	16445245	2	2207	11648.6	1559.24	232	Zc3h4	Npas1,Sae1,Tmem160	Tmem160	232	1
4_M00002_1_Fus1_T_CnR_ac4729_peak_22663_lociStitched	chr5	151053920	151069973	4	2520	11686.6	1639.01	233	Stard13		Kl	233	1
3_M00002_1_Fus1_T_CnR_ac4729_peak_11923_lociStitched	chr17	46273626	46288341	3	3090	11767.6	1745.2	234	Tjap1	Tjap1,Lrrc73,Abcc10,Mir693,Dlk2,Polr1c,Yipf3	Tjap1	234	1
4_M00002_1_Fus1_T_CnR_ac4729_peak_26276_lociStitched	chr8	26961399	26981834	4	2583	12438.8	2437.9	235	Zfp703	Erlin2	Zfp703	235	1
4_M00002_1_Fus1_T_CnR_ac4729_peak_6146_lociStitched	chr12	82246587	82259057	4	3210	11069.6	1160.96	236	Sipa1l1		Sipa1l1	236	1
5_M00002_1_Fus1_T_CnR_ac4729_peak_169_lociStitched	chr1	34103133	34126945	5	2795	12189.4	2281.19	237	Dst	Dst	Dst	237	1
4_M00002_1_Fus1_T_CnR_ac4729_peak_26002_lociStitched	chr7	145197896	145222413	4	3602	13062.7	3184.76	238	1810010D01Rik		1810010D01Rik	238	1
6_M00002_1_Fus1_T_CnR_ac4729_peak_11031_lociStitched	chr16	58498737	58514100	6	2551	11474.6	1606.97	239	St3gal6		St3gal6	239	1
6_M00002_1_Fus1_T_CnR_ac4729_peak_17390_lociStitched	chr3	57287934	57305292	6	4526	12284.3	2430.12	240	Tm4sf1		Tm4sf1	240	1
2_M00002_1_Fus1_T_CnR_ac4729_peak_8056_lociStitched	chr14	7943237	7954704	2	3036	11480.8	1659.27	241	Flnb	Abhd6,Dnase1l3	Dnase1l3	241	1
3_M00002_1_Fus1_T_CnR_ac4729_peak_17323_lociStitched	chr3	53180743	53202792	3	2975	12512.8	2742.9	242	Lhfp		Lhfp	242	1
3_M00002_1_Fus1_T_CnR_ac4729_peak_19420_lociStitched	chr4	63398934	63417780	3	3236	12734.2	2970.13	243	Akna,Whrn	Orm2,Orm3	Akna	243	1
3_M00002_1_Fus1_T_CnR_ac4729_peak_26068_lociStitched	chr8	10910365	10925497	3	2150	11966.4	2238.02	244	3930402G23Rik	4833411C07Rik,B930025P03Rik	3930402G23Rik	244	1
2_M00002_1_Fus1_T_CnR_ac4729_peak_11592_lociStitched	chr17	26887665	26894362	2	2950	10853.2	1131.12	245		Cuta,Nkx2-5,Phf1,Kifc5b	Kifc5b	245	1
3_M00002_1_Fus1_T_CnR_ac4729_peak_11296_lociStitched	chr17	4611992	4627781	3	2708	12462.3	2755.18	246			Arid1b	246	1
4_M00002_1_Fus1_T_CnR_ac4729_peak_10401_lociStitched	chr16	10657931	10669357	4	2864	11026.1	1353.98	247	Clec16a		Clec16a	247	1
5_M00002_1_Fus1_T_CnR_ac4729_peak_5904_lociStitched	chr12	69434651	69462524	5	3377	13200.7	3534.3	248		5830428M24Rik	5830428M24Rik	248	1
5_M00002_1_Fus1_T_CnR_ac4729_peak_26547_lociStitched	chr8	68143939	68158159	5	3107	11802.6	2144.38	249			Sh2d4a	249	1
4_M00002_1_Fus1_T_CnR_ac4729_peak_3705_lociStitched	chr11	20588844	20616304	4	3918	13447.2	3794.97	250	Sertad2	Sertad2	Sertad2	250	1
5_M00002_1_Fus1_T_CnR_ac4729_peak_28144_lociStitched	chr9	62510969	62532575	5	3008	12980.9	3351.09	251	Coro2b		Coro2b	251	1
4_M00002_1_Fus1_T_CnR_ac4729_peak_14015_lociStitched	chr19	41992009	42018074	4	4807	13400	3795.06	252	Ubtd1	Mms19,Ankrd2,Hoga1,4933411K16Rik	Ubtd1	252	1
4_M00002_1_Fus1_T_CnR_ac4729_peak_23203_lociStitched	chr6	53457969	53471571	4	2532	11790.2	2214.41	253			Creb5	253	1
5_M00002_1_Fus1_T_CnR_ac4729_peak_19914_lociStitched	chr4	114530443	114551129	5	2928	11908.9	2333.38	254	Trabd2b		Trabd2b	254	1
3_M00002_1_Fus1_T_CnR_ac4729_peak_16696_lociStitched	chr2	173342720	173354581	3	2917	11392.5	1844.39	255			Pmepa1	255	1
5_M00002_1_Fus1_T_CnR_ac4729_peak_12636_lociStitched	chr18	14653464	14672224	5	2276	11715.6	2178.04	256	Ss18	Psma8	Ss18	256	1
6_M00002_1_Fus1_T_CnR_ac4729_peak_14742_lociStitched	chr2	30639771	30659187	6	3390	12602.9	3083.26	257		Cstad	Cstad	257	1
2_M00002_1_Fus1_T_CnR_ac4729_peak_20074_lociStitched	chr4	124989162	125000379	2	2233	11178.9	1673.58	258	Rspo1	Gnl2	Rspo1	258	1
4_M00002_1_Fus1_T_CnR_ac4729_peak_19824_lociStitched	chr4	106828045	106848906	4	2933	12066	2601.37	259		Acot11	Acot11	259	1
2_M00002_1_Fus1_T_CnR_ac4729_peak_6528_lociStitched	chr12	110498279	110510755	2	2490	11111.1	1658.06	260	Ppp2r5c		Ppp2r5c	260	1
3_M00002_1_Fus1_T_CnR_ac4729_peak_28216_lociStitched	chr9	65108915	65120739	3	1883	11287.2	1888.29	261	Igdcc4	Igdcc3	Igdcc4	261	1
4_M00002_1_Fus1_T_CnR_ac4729_peak_11556_lociStitched	chr17	25961437	25990782	4	3208	13663	4266.76	262	Solh,Rab11fip3	Rab40c,Pigq,Nhlrc4	Solh	262	1
3_M00002_1_Fus1_T_CnR_ac4729_peak_20480_lociStitched	chr4	141239466	141257524	3	2436	11614.9	2302.39	263	Arhgef19	Epha2,Rsg1	Arhgef19	263	1
5_M00002_1_Fus1_T_CnR_ac4729_peak_14766_lociStitched	chr2	30847666	30886384	5	3127	15487.2	6214.24	264	Prrx2	1700001O22Rik,Ptges,Ntmt1,Asb6	Prrx2	264	1
3_M00002_1_Fus1_T_CnR_ac4729_peak_18774_lociStitched	chr3	151891194	151914608	3	3512	12748.9	3500.39	265			Ptgfr	265	1
4_M00002_1_Fus1_T_CnR_ac4729_peak_21737_lociStitched	chr5	92924781	92939511	4	3100	11178.6	1957.62	266	Shroom3		Shroom3	266	1
4_M00002_1_Fus1_T_CnR_ac4729_peak_643_lociStitched	chr1	75344190	75357669	4	1594	11174.1	1963.89	267		Speg,Dnpep,Des,Gm15179	Des	267	1
2_M00002_1_Fus1_T_CnR_ac4729_peak_11719_lociStitched	chr17	31535645	31542334	2	1761	10061.6	868.232	268		Pknox1,Ndufv3,Wdr4	Ndufv3	268	1
5_M00002_1_Fus1_T_CnR_ac4729_peak_7432_lociStitched	chr13	63225718	63260978	5	2449	13896	4714.26	269	2010111I01Rik	Mir27b,Mir23b,Mir3074-1,Gm16907,Mir24-1	Gm16907	269	1
4_M00002_1_Fus1_T_CnR_ac4729_peak_5220_lociStitched	chr11	117339142	117350681	4	2169	10765.9	1597	270	2020-09-09		2020-09-09	270	1
2_M00002_1_Fus1_T_CnR_ac4729_peak_844_lociStitched	chr1	88462944	88476350	2	2881	10944.7	1795.06	271		Glrp1	Glrp1	271	1
3_M00002_1_Fus1_T_CnR_ac4729_peak_17882_lociStitched	chr3	90537209	90557504	3	2971	12103.9	2959.01	272	S100a16	S100a14,S100a13,Chtop,Snapin,S100a3,S100a2,S100a4,S100a1	S100a16	272	1
2_M00002_1_Fus1_T_CnR_ac4729_peak_13463_lociStitched	chr19	4216382	4228466	2	741	10397.1	1257.94	273	Clcf1	Rad9a,Ssh3,Pold4,Carns1,Ppp1ca,Tbc1d10c	Clcf1	273	1
4_M00002_1_Fus1_T_CnR_ac4729_peak_27113_lociStitched	chr8	108124829	108148922	4	2498	11906.8	2785.15	274			3010033K07Rik	274	1
2_M00002_1_Fus1_T_CnR_ac4729_peak_23941_lociStitched	chr6	120989115	121001417	2	2081	10587.1	1472.55	275	Mical3		Bid	275	1
4_M00002_1_Fus1_T_CnR_ac4729_peak_24820_lociStitched	chr7	65871450	65900074	4	3822	13235.7	4127.58	276	Pcsk6		Pcsk6	276	1
2_M00002_1_Fus1_T_CnR_ac4729_peak_23956_lociStitched	chr6	121590093	121597725	2	2514	10191	1096.72	277		A2m	A2m	277	1
4_M00002_1_Fus1_T_CnR_ac4729_peak_13835_lociStitched	chr19	28337077	28354481	4	2964	11518	2424.38	278	Glis3		D930032P07Rik	278	1
5_M00002_1_Fus1_T_CnR_ac4729_peak_21730_lociStitched	chr5	92877313	92906025	5	3734	12822.8	3738.3	279	Shroom3		Shroom3	279	1
2_M00002_1_Fus1_T_CnR_ac4729_peak_2372_lociStitched	chr10	42855027	42865177	2	1345	10357.1	1284.99	280	Scml4		Scml4	280	1
6_M00002_1_Fus1_T_CnR_ac4729_peak_20442_lociStitched	chr4	140610381	140637067	6	3025	12555.8	3503.87	281	Arhgef10l		Arhgef10l	281	1
6_M00002_1_Fus1_T_CnR_ac4729_peak_10524_lociStitched	chr16	18395237	18425312	6	4469	12418	3389.45	282	Arvcf,Comt	Txnrd2,Arvcf,Comt	Comt	282	1
2_M00002_1_Fus1_T_CnR_ac4729_peak_25565_lociStitched	chr7	115494353	115502628	2	2658	10031	1019.48	283	Sox6		Sox6	283	1
4_M00002_1_Fus1_T_CnR_ac4729_peak_27033_lociStitched	chr8	105319367	105340388	4	3434	11904.2	2951.35	284	Fhod1,Tmem208,Lrrc29	Elmo3,Hsf4,Slc9a5,Exoc3l,Plekhg4,E2f4,4931428F04Rik,Mir328,Nol3	Tmem208	284	1
4_M00002_1_Fus1_T_CnR_ac4729_peak_12620_lociStitched	chr18	13890205	13899501	4	2179	10128	1192.68	285	Zfp521		Zfp521	285	1
4_M00002_1_Fus1_T_CnR_ac4729_peak_17318_lociStitched	chr3	53101503	53117169	4	3396	11699.4	2776.02	286	Lhfp		Lhfp	286	1
1_M00002_1_Fus1_T_CnR_ac4729_peak_18817_lociStitched	chr3	153615694	153618265	1	2572	9543.29	627.067	287	St6galnac3		St6galnac3	287	1
5_M00002_1_Fus1_T_CnR_ac4729_peak_27925_lociStitched	chr9	46052463	46083989	5	3886	12698.7	3795.73	288	Sik3		Sik3	288	1
1_M00002_1_Fus1_T_CnR_ac4729_peak_4834_lociStitched	chr11	96967006	96968983	1	1978	9280.04	418.333	289	Sp2	Sp6,D030028A08Rik,Prr15l,Pnpo	Sp2	289	1
7_M00002_1_Fus1_T_CnR_ac4729_peak_4540_lociStitched	chr11	79064065	79095988	7	3828	13793.9	4948.06	290	Ksr1	Gm11201	Gm11201	290	1
5_M00002_1_Fus1_T_CnR_ac4729_peak_14748_lociStitched	chr2	30685365	30709820	5	3176	12819.3	3973.94	291		Mir3089	Mir3089	291	1
2_M00002_1_Fus1_T_CnR_ac4729_peak_12811_lociStitched	chr18	36088139	36100162	2	2105	10306.1	1463.2	292	Nrg2	4930471G03Rik	4930471G03Rik	292	1
4_M00002_1_Fus1_T_CnR_ac4729_peak_24156_lociStitched	chr6	140336268	140354730	4	2686	11062.4	2222.82	293			Plekha5	293	1
3_M00002_1_Fus1_T_CnR_ac4729_peak_24793_lociStitched	chr7	63902675	63925857	3	2872	11502.9	2700.7	294	Klf13,E030018B13Rik		E030018B13Rik	294	1
2_M00002_1_Fus1_T_CnR_ac4729_peak_4222_lociStitched	chr11	61025055	61032101	2	1617	9828.47	1056.2	295	Kcnj12	Kcnj12	Kcnj12	295	1
2_M00002_1_Fus1_T_CnR_ac4729_peak_4069_lociStitched	chr11	53103437	53110603	2	2001	9649.74	900.766	296	Fstl4	Gm11186	Gm11186	296	1
3_M00002_1_Fus1_T_CnR_ac4729_peak_17932_lociStitched	chr3	95667670	95682164	3	2882	11222.7	2495.87	297	Adamtsl4	Mcl1,Ensa	Adamtsl4	297	1
2_M00002_1_Fus1_T_CnR_ac4729_peak_15393_lociStitched	chr2	78010945	78022361	2	2573	19440.3	10713.9	298			Cwc22	298	1
6_M00002_1_Fus1_T_CnR_ac4729_peak_6241_lociStitched	chr12	86000491	86024474	6	2707	11643.7	2945.11	299	Ttll5		Tgfb3	299	1
5_M00002_1_Fus1_T_CnR_ac4729_peak_321_lociStitched	chr1	45020686	45043986	5	3631	11102.5	2425.53	300			Col3a1	300	1
4_M00002_1_Fus1_T_CnR_ac4729_peak_4122_lociStitched	chr11	54998677	55024243	4	2698	12174.5	3512.77	301	Anxa6	Tnip1,Anxa6	Anxa6	301	1
4_M00002_1_Fus1_T_CnR_ac4729_peak_26264_lociStitched	chr8	26784393	26811778	4	3065	12238.4	3590.17	302		2310008N11Rik	2310008N11Rik	302	1
3_M00002_1_Fus1_T_CnR_ac4729_peak_9768_lociStitched	chr15	75045403	75063780	3	2323	11627.1	2991.78	303	Ly6c1	Ly6a,Ly6c2	Ly6c1	303	1
5_M00002_1_Fus1_T_CnR_ac4729_peak_27354_lociStitched	chr8	122179062	122201222	5	2395	12090.5	3472.47	304			Zfpm1	304	1
2_M00002_1_Fus1_T_CnR_ac4729_peak_20243_lociStitched	chr4	133038654	133052038	2	1835	10894.6	2324.8	305	Ahdc1		Ahdc1	305	1
3_M00002_1_Fus1_T_CnR_ac4729_peak_18410_lociStitched	chr3	126652467	126664003	3	1596	10294.7	1805.38	306	Camk2d		Camk2d	306	1
4_M00002_1_Fus1_T_CnR_ac4729_peak_14113_lociStitched	chr19	47279882	47315160	4	2756	13455	4967.14	307	Sh3pxd2a		Neurl1a	307	1
3_M00002_1_Fus1_T_CnR_ac4729_peak_28170_lociStitched	chr9	63705694	63722196	3	1947	10767.6	2320.18	308	Smad3		Smad3	308	1
5_M00002_1_Fus1_T_CnR_ac4729_peak_13871_lociStitched	chr19	29821735	29851726	5	2238	11729.5	3296.01	309		9930021J03Rik,Ranbp6	Ranbp6	309	1
3_M00002_1_Fus1_T_CnR_ac4729_peak_4492_lociStitched	chr11	77442081	77446934	3	1800	8995.52	591.095	310	Ssh2	Coro6,Ankrd13b,Git1	Coro6	310	1
2_M00002_1_Fus1_T_CnR_ac4729_peak_23420_lociStitched	chr6	85295722	85303823	2	2022	9727.68	1334.23	311	Sfxn5	Mir705	Sfxn5	311	1
4_M00002_1_Fus1_T_CnR_ac4729_peak_14627_lociStitched	chr2	27734317	27758911	4	3220	12744.6	4355.6	312	Rxra		Rxra	312	1
3_M00002_1_Fus1_T_CnR_ac4729_peak_21084_lociStitched	chr5	25934793	25955168	3	2196	12347.2	3977.2	313			Speer4a	313	1
4_M00002_1_Fus1_T_CnR_ac4729_peak_9757_lociStitched	chr15	74921513	74935098	4	1964	10188.8	1823.11	314		2010109I03Rik,Ly6e,Ly6i	Ly6e	314	1
4_M00002_1_Fus1_T_CnR_ac4729_peak_878_lociStitched	chr1	90221608	90235349	4	2214	10279.6	1915.5	315		Cxcr7	Cxcr7	315	1
2_M00002_1_Fus1_T_CnR_ac4729_peak_13446_lociStitched	chr19	4067770	4070225	2	1933	8533.09	200.819	316		Cabp2,Cdk2ap2,Gstp1,Pitpnm1,Gstp2,BC021614	BC021614	316	1
4_M00002_1_Fus1_T_CnR_ac4729_peak_1095_lociStitched	chr1	131270222	131294337	4	3541	11739.2	3426.74	317	Srgap2,Ikbke	Rassf5	Ikbke	317	1
7_M00002_1_Fus1_T_CnR_ac4729_peak_14318_lociStitched	chr2	4413191	4453085	7	3702	13516.1	5222.12	318	Frmd4a		Frmd4a	318	1
2_M00002_1_Fus1_T_CnR_ac4729_peak_10186_lociStitched	chr15	97828575	97838137	2	2383	9822.09	1534.7	319	Hdac7	Slc48a1,Hdac7	Hdac7	319	1
3_M00002_1_Fus1_T_CnR_ac4729_peak_12820_lociStitched	chr18	36392163	36415994	3	2321	11388.8	3102.8	320	Cystm1,Pfdn1		Pfdn1	320	1
5_M00002_1_Fus1_T_CnR_ac4729_peak_7398_lociStitched	chr13	60409168	60435228	5	3497	12026.7	3757.85	321			Dapk1	321	1
3_M00002_1_Fus1_T_CnR_ac4729_peak_75_lociStitched	chr1	14009987	14018096	3	2101	9056.13	794.682	322			Gm5523	322	1
3_M00002_1_Fus1_T_CnR_ac4729_peak_20344_lociStitched	chr4	136802223	136812002	3	1916	9451.4	1195.97	323	Ephb2		Ephb2	323	1
3_M00002_1_Fus1_T_CnR_ac4729_peak_5244_lociStitched	chr11	117993795	118016632	3	1767	11713.1	3464.37	324	Pgs1	Socs3	Pgs1	324	1
4_M00002_1_Fus1_T_CnR_ac4729_peak_6109_lociStitched	chr12	80244224	80254410	4	1379	9236.66	1032.86	325	Actn1		Actn1	325	1
5_M00002_1_Fus1_T_CnR_ac4729_peak_11335_lociStitched	chr17	6422086	6446551	5	3470	15046	6864.88	326	Tmem181b-ps,Dynlt1b		Dynlt1b	326	1
4_M00002_1_Fus1_T_CnR_ac4729_peak_11408_lociStitched	chr17	12186984	12207288	4	3150	10239.3	2060.86	327	Agpat4		Agpat4	327	1
3_M00002_1_Fus1_T_CnR_ac4729_peak_3613_lociStitched	chr11	11939708	11954569	3	1681	9971.73	1799.67	328	Grb10	Ddc	Ddc	328	1
4_M00002_1_Fus1_T_CnR_ac4729_peak_14091_lociStitched	chr19	46503787	46530734	4	2391	11859.4	3697.13	329	Trim8	Sfxn2,Arl3	Trim8	329	1
2_M00002_1_Fus1_T_CnR_ac4729_peak_2731_lociStitched	chr10	77242212	77252979	2	2185	10035.9	1874.53	330		Pofut2,Gm10941	Gm10941	330	1
4_M00002_1_Fus1_T_CnR_ac4729_peak_18550_lociStitched	chr3	136864627	136883275	4	2743	10513.7	2358.97	331	Ppp3ca		Ppp3ca	331	1
3_M00002_1_Fus1_T_CnR_ac4729_peak_8334_lociStitched	chr14	30584387	30601726	3	2148	10807.4	2666.74	332	Prkcd	Tkt,Mir3076	Mir3076	332	1
3_M00002_1_Fus1_T_CnR_ac4729_peak_22045_lociStitched	chr5	114356827	114372703	3	2246	10627.4	2502.06	333	Myo1h,Kctd10	Ube3b	Kctd10	333	1
3_M00002_1_Fus1_T_CnR_ac4729_peak_24911_lociStitched	chr7	68293374	68304269	3	2669	9618.11	1494.79	334	Fam169b	Pgpep1l,Gm16157	Gm16157	334	1
6_M00002_1_Fus1_T_CnR_ac4729_peak_210_lociStitched	chr1	36059960	36090266	6	3072	12407.3	4294.36	335	Hs6st1		Hs6st1	335	1
3_M00002_1_Fus1_T_CnR_ac4729_peak_20324_lociStitched	chr4	136122935	136140933	3	3209	10582.8	2483.72	336		Id3,E2f2	Id3	336	1
2_M00002_1_Fus1_T_CnR_ac4729_peak_22207_lociStitched	chr5	123129212	123139819	2	1352	9648.13	1566.65	337	Rhof	Setd1b,Hpd	Rhof	337	1
3_M00002_1_Fus1_T_CnR_ac4729_peak_2512_lociStitched	chr10	59942926	59949513	3	2160	8912.21	874.095	338		Ddit4	Ddit4	338	1
4_M00002_1_Fus1_T_CnR_ac4729_peak_10668_lociStitched	chr16	29881161	29894658	4	2740	9438.45	1407.74	339			Gm1968	339	1
5_M00002_1_Fus1_T_CnR_ac4729_peak_13839_lociStitched	chr19	28376464	28399387	5	1590	10792.1	2771.39	340	Glis3		D930032P07Rik	340	1
2_M00002_1_Fus1_T_CnR_ac4729_peak_20861_lociStitched	chr5	8052159	8054951	2	2360	8268.79	255.468	341	Sri	Sri	Sri	341	1
4_M00002_1_Fus1_T_CnR_ac4729_peak_19120_lociStitched	chr4	40837160	40853321	4	4558	10464.2	2453.24	342	Mir5123,B4galt1		Mir5123	342	1
3_M00002_1_Fus1_T_CnR_ac4729_peak_12496_lociStitched	chr18	5395853	5415104	3	2564	10524.5	2577.71	343			Zfp438	343	1
5_M00002_1_Fus1_T_CnR_ac4729_peak_902_lociStitched	chr1	91011772	91039109	5	2238	11156.2	3212.1	344	Lrrfip1	Rab17,Lrrfip1	Lrrfip1	344	1
3_M00002_1_Fus1_T_CnR_ac4729_peak_28886_lociStitched	chr9	119599237	119613163	3	3012	9748.2	1811.77	345	Scn10a	Scn5a	Scn5a	345	1
4_M00002_1_Fus1_T_CnR_ac4729_peak_861_lociStitched	chr1	89080684	89108999	4	2243	11028.7	3106.16	346	Sh3bp4		Sh3bp4	346	1
6_M00002_1_Fus1_T_CnR_ac4729_peak_24084_lociStitched	chr6	135070270	135113364	6	3517	13734.1	5834.93	347	Gprc5a,Gprc5d	Gprc5d	Gprc5a	347	1
5_M00002_1_Fus1_T_CnR_ac4729_peak_18284_lociStitched	chr3	116105031	116126980	5	3214	11472.7	3577.69	348	Vcam1		Vcam1	348	1
4_M00002_1_Fus1_T_CnR_ac4729_peak_20887_lociStitched	chr5	13499684	13527761	4	2337	10809.6	2920.01	349	Sema3a		Sema3a	349	1
3_M00002_1_Fus1_T_CnR_ac4729_peak_22528_lociStitched	chr5	142909309	142929549	3	2495	10824.4	2938.85	350		Actb,Fscn1,Fbxl18	Actb	350	1
1_M00002_1_Fus1_T_CnR_ac4729_peak_22980_lociStitched	chr6	34706901	34708973	1	2073	8367.15	511.784	351		Cald1	Cald1	351	1
3_M00002_1_Fus1_T_CnR_ac4729_peak_14800_lociStitched	chr2	31769419	31782207	3	1640	9895.35	2060.15	352	Abl1	Qrfp	Abl1	352	1
3_M00002_1_Fus1_T_CnR_ac4729_peak_9252_lociStitched	chr15	28004660	28020420	3	2017	9824.78	2009.4	353	Trio		Trio	353	1
3_M00002_1_Fus1_T_CnR_ac4729_peak_20667_lociStitched	chr4	154414838	154425684	3	2276	9113.89	1324.3	354	Prdm16		Arhgef16	354	1
3_M00002_1_Fus1_T_CnR_ac4729_peak_19196_lociStitched	chr4	42641523	42655767	3	1616	9557.72	1777.65	355	LOC100861978,Ccl27b,Il11ra2,Gm13306		Ccl19	355	1
4_M00002_1_Fus1_T_CnR_ac4729_peak_7150_lociStitched	chr13	42865504	42871053	4	2178	8644.23	868.973	356	Phactr1		Phactr1	356	1
3_M00002_1_Fus1_T_CnR_ac4729_peak_25936_lociStitched	chr7	142553886	142571452	3	2088	10091.7	2325.74	357	Nctc1	Mrpl23,H19,Gm14492,Mir675	Nctc1	357	1
5_M00002_1_Fus1_T_CnR_ac4729_peak_18688_lociStitched	chr3	145681662	145703995	5	3433	11680.2	3952.94	358		Cyr61	Cyr61	358	1
2_M00002_1_Fus1_T_CnR_ac4729_peak_10792_lociStitched	chr16	35737706	35749044	2	3105	9272.22	1563.51	359	Dirc2	Hspbap1	Dirc2	359	1
3_M00002_1_Fus1_T_CnR_ac4729_peak_13079_lociStitched	chr18	60480959	60491407	3	2392	9106.48	1397.94	360	Smim3	Dctn4	Smim3	360	1
3_M00002_1_Fus1_T_CnR_ac4729_peak_28171_lociStitched	chr9	63737153	63749713	3	2306	9348.41	1642.85	361	Smad3		Smad3	361	1
3_M00002_1_Fus1_T_CnR_ac4729_peak_18420_lociStitched	chr3	126722573	126748637	3	2485	11353.5	3656.78	362	Camk2d		Camk2d	362	1
4_M00002_1_Fus1_T_CnR_ac4729_peak_12067_lociStitched	chr17	62676175	62696034	4	2930	9867.94	2182.5	363	Efna5		Efna5	363	1
6_M00002_1_Fus1_T_CnR_ac4729_peak_18634_lociStitched	chr3	142316262	142346025	6	3166	11911.2	4229.32	364	Pdlim5	Pdlim5	Pdlim5	364	1
2_M00002_1_Fus1_T_CnR_ac4729_peak_27971_lociStitched	chr9	51397711	51411255	2	3153	9474.03	1795.93	365			1810046K07Rik	365	1
3_M00002_1_Fus1_T_CnR_ac4729_peak_7794_lociStitched	chr13	97902239	97911678	3	2413	8763.17	1092.09	366	Arhgef28		Arhgef28	366	1
4_M00002_1_Fus1_T_CnR_ac4729_peak_20722_lociStitched	chr4	155205776	155216189	4	2413	8776.08	1105.86	367	Ski	2610002J02Rik	Ski	367	1
2_M00002_1_Fus1_T_CnR_ac4729_peak_25875_lociStitched	chr7	141091184	141097283	2	2230	8697.17	1060.01	368	Sigirr	Pkp3,Ptdss2,B4galnt4,Ano9	Sigirr	368	1
2_M00002_1_Fus1_T_CnR_ac4729_peak_7086_lociStitched	chr13	36724457	36737103	2	2265	9279.63	1669.27	369	Nrn1		Nrn1	369	1
3_M00002_1_Fus1_T_CnR_ac4729_peak_17112_lociStitched	chr3	34095795	34105714	3	1807	9102.67	1552.32	370		Dnajc19	Dnajc19	370	1
3_M00002_1_Fus1_T_CnR_ac4729_peak_4085_lociStitched	chr11	53761746	53776100	3	2423	9660.24	2110.04	371	Irf1	Il5	Irf1	371	1
4_M00002_1_Fus1_T_CnR_ac4729_peak_29082_lociStitched	chrX	12111948	12134103	4	2306	8793.32	1253.97	372	Bcor	Bcor,2900008C10Rik	2900008C10Rik	372	1
1_M00002_1_Fus1_T_CnR_ac4729_peak_25980_lociStitched	chr7	144800443	144802320	1	1878	7814.7	278.171	373		Fgf3	Fgf3	373	1
4_M00002_1_Fus1_T_CnR_ac4729_peak_24031_lociStitched	chr6	128086588	128091614	4	1662	8304.46	790.59	374	Tspan9		Tspan9	374	1
3_M00002_1_Fus1_T_CnR_ac4729_peak_16582_lociStitched	chr2	168045606	168058993	3	1991	9585.09	2072.31	375		Fam65c,Pard6b	Pard6b	375	1
4_M00002_1_Fus1_T_CnR_ac4729_peak_6820_lociStitched	chr13	15537052	15546555	4	1890	8771.27	1291.46	376	Gli3		Gli3	376	1
1_M00002_1_Fus1_T_CnR_ac4729_peak_14550_lociStitched	chr2	25497241	25498828	1	1588	7713.93	237.733	377	C8g	Ptgds,BC029214,Fbxw5,Lcn12,Clic3,Traf2	C8g	377	1
2_M00002_1_Fus1_T_CnR_ac4729_peak_17789_lociStitched	chr3	88138048	88149914	2	2712	9921.16	2452.7	378	Mef2d	1700113A16Rik	Mef2d	378	1
2_M00002_1_Fus1_T_CnR_ac4729_peak_23938_lociStitched	chr6	120927256	120930469	2	1775	7728.23	279.531	379		Bid	Bid	379	1
3_M00002_1_Fus1_T_CnR_ac4729_peak_23901_lociStitched	chr6	118593381	118609650	3	3528	9632.87	2191.43	380	Cacna1c	Ankrd26	Ankrd26	380	1
2_M00002_1_Fus1_T_CnR_ac4729_peak_20458_lociStitched	chr4	140910898	140916193	2	2296	8215.19	776.247	381	Padi2	4930515B02Rik,Sdhb,Gm13031	Padi2	381	1
3_M00002_1_Fus1_T_CnR_ac4729_peak_6389_lociStitched	chr12	102194615	102215710	3	2488	10372.4	2970.18	382	Slc24a4		Slc24a4	382	1
3_M00002_1_Fus1_T_CnR_ac4729_peak_19683_lociStitched	chr4	89427454	89448029	3	3193	9384.26	2030.75	383			Cdkn2b	383	1
3_M00002_1_Fus1_T_CnR_ac4729_peak_19990_lociStitched	chr4	119118866	119127285	3	2459	8318.81	1001.02	384	Slc2a1	Zfp691	Slc2a1	384	1
4_M00002_1_Fus1_T_CnR_ac4729_peak_10710_lociStitched	chr16	31526176	31552409	4	3456	10737.2	3436.52	385			Bdh1	385	1
2_M00002_1_Fus1_T_CnR_ac4729_peak_7818_lociStitched	chr13	99063156	99070585	2	1737	8376.2	1082.41	386		2310020H05Rik	2310020H05Rik	386	1
3_M00002_1_Fus1_T_CnR_ac4729_peak_10022_lociStitched	chr15	83435136	83448346	3	1465	9007.9	1730.51	387	Pacsin2	Pacsin2	Pacsin2	387	1
6_M00002_1_Fus1_T_CnR_ac4729_peak_7784_lociStitched	chr13	97743881	97775184	6	2270	10733.8	3465.24	388			Gm5086	388	1
3_M00002_1_Fus1_T_CnR_ac4729_peak_4567_lociStitched	chr11	79729305	79746351	3	1783	9094.04	1840.97	389		Mir193,Mir365-2	Mir365-2	389	1
5_M00002_1_Fus1_T_CnR_ac4729_peak_5705_lociStitched	chr12	40558939	40585337	5	2157	9944.13	2697.88	390	Dock4		Dock4	390	1
4_M00002_1_Fus1_T_CnR_ac4729_peak_2923_lociStitched	chr10	84021112	84043990	4	2572	10125.8	2896.35	391			1500009L16Rik	391	1
1_M00002_1_Fus1_T_CnR_ac4729_peak_10390_lociStitched	chr16	10384379	10386059	1	1681	7429.63	223.776	392	Tekt5	Nubp1	Tekt5	392	1
3_M00002_1_Fus1_T_CnR_ac4729_peak_14754_lociStitched	chr2	30743295	30759366	3	2709	9546.17	2344.76	393		Ntmt1,1700001O22Rik,Mir3089	Mir3089	393	1
3_M00002_1_Fus1_T_CnR_ac4729_peak_1117_lociStitched	chr1	132326346	132336191	3	2405	8380.06	1183.37	394	Nuak2	Nuak2,Klhdc8a	Nuak2	394	1
4_M00002_1_Fus1_T_CnR_ac4729_peak_9050_lociStitched	chr14	121225398	121248314	4	2230	10619.3	3430.53	395	Farp1		Stk24	395	1
3_M00002_1_Fus1_T_CnR_ac4729_peak_14088_lociStitched	chr19	46470764	46485038	3	2509	8938.38	1757.13	396	Sufu	Trim8	Trim8	396	1
4_M00002_1_Fus1_T_CnR_ac4729_peak_25434_lociStitched	chr7	109803627	109823344	4	2275	9736.25	2557.29	397	Scube2	Nrip3	Nrip3	397	1
5_M00002_1_Fus1_T_CnR_ac4729_peak_15533_lociStitched	chr2	93214159	93237750	5	2723	10205.5	3029.08	398	Tspan18	Trp53i11	Trp53i11	398	1
3_M00002_1_Fus1_T_CnR_ac4729_peak_21322_lociStitched	chr5	36373025	36382961	3	2150	8740.7	1579.82	399	Sorcs2		Sorcs2	399	1
3_M00002_1_Fus1_T_CnR_ac4729_peak_6960_lociStitched	chr13	28680556	28698344	3	2717	9203.51	2054.51	400	2610307P16Rik		2610307P16Rik	400	1
2_M00002_1_Fus1_T_CnR_ac4729_peak_27789_lociStitched	chr9	37139578	37146434	2	2405	8034.55	898.822	401	Pknox2		Pknox2	401	1
2_M00002_1_Fus1_T_CnR_ac4729_peak_14999_lociStitched	chr2	38771325	38780380	2	1313	8193.87	1063.06	402	Nr6a1	Nr6a1	Nr6a1	402	1
2_M00002_1_Fus1_T_CnR_ac4729_peak_4564_lociStitched	chr11	79703416	79714751	2	3165	8797.09	1669.65	403	Mir193	4930542H20Rik,Mir365-2	Mir193	403	1
5_M00002_1_Fus1_T_CnR_ac4729_peak_25638_lociStitched	chr7	123082986	123111069	5	3313	11078.7	3962.51	404		Tnrc6a	Tnrc6a	404	1
4_M00002_1_Fus1_T_CnR_ac4729_peak_24204_lociStitched	chr6	144043078	144057210	4	2317	8818.37	1704.32	405	Sox5		Sox5	405	1
2_M00002_1_Fus1_T_CnR_ac4729_peak_16338_lociStitched	chr2	157058301	157072214	2	1592	9232.67	2132.86	406	9830001H06Rik	Tldc2	9830001H06Rik	406	1
5_M00002_1_Fus1_T_CnR_ac4729_peak_3111_lociStitched	chr10	95385456	95397728	5	2857	8476.27	1403.92	407		2310039L15Rik,Socs2,5730420D15Rik	Socs2	407	1
3_M00002_1_Fus1_T_CnR_ac4729_peak_12535_lociStitched	chr18	7501768	7513477	3	2349	8193.96	1124.06	408	Mpp7		Mpp7	408	1
2_M00002_1_Fus1_T_CnR_ac4729_peak_20469_lociStitched	chr4	141020650	141032158	2	2265	8822.03	1761.87	409	Crocc	Mfap2,Atp13a2,Necap2	Mfap2	409	1
3_M00002_1_Fus1_T_CnR_ac4729_peak_5984_lociStitched	chr12	73445397	73462506	3	2190	9204.64	2162.58	410		D830013O20Rik	D830013O20Rik	410	1
3_M00002_1_Fus1_T_CnR_ac4729_peak_23716_lociStitched	chr6	100495002	100510779	3	2357	9582.95	2562.18	411		1700049E22Rik	1700049E22Rik	411	1
1_M00002_1_Fus1_T_CnR_ac4729_peak_14679_lociStitched	chr2	28886017	28887693	1	1677	7317.42	296.987	412	Ddx31	Gtf3c4,Barhl1	Barhl1	412	1
3_M00002_1_Fus1_T_CnR_ac4729_peak_22739_lociStitched	chr6	6091856	6114237	3	2982	10080.4	3061.72	413	Slc25a13		Slc25a13	413	1
3_M00002_1_Fus1_T_CnR_ac4729_peak_28331_lociStitched	chr9	71879781	71899301	3	1473	9248.58	2236.99	414	Tcf12		Tcf12	414	1
3_M00002_1_Fus1_T_CnR_ac4729_peak_14870_lociStitched	chr2	33584362	33591530	3	2435	8405.2	1412.1	415	Lmx1b	C130021I20Rik	Lmx1b	415	1
3_M00002_1_Fus1_T_CnR_ac4729_peak_26837_lociStitched	chr8	87737979	87747991	3	2324	8633.35	1663.99	416	Zfp423		4933402J07Rik	416	1
4_M00002_1_Fus1_T_CnR_ac4729_peak_14971_lociStitched	chr2	38339514	38348369	4	1916	7867.67	910.294	417		Lhx2	Lhx2	417	1
3_M00002_1_Fus1_T_CnR_ac4729_peak_22878_lociStitched	chr6	28845715	28865194	3	2209	9188.24	2234.24	418	Snd1	Lrrc4	Lrrc4	418	1
2_M00002_1_Fus1_T_CnR_ac4729_peak_6836_lociStitched	chr13	15740812	15743096	2	2033	7330.5	380.743	419			4933412O06Rik	419	1
3_M00002_1_Fus1_T_CnR_ac4729_peak_9646_lociStitched	chr15	62320908	62335111	3	1619	8460.73	1518.3	420			H2afy3	420	1
2_M00002_1_Fus1_T_CnR_ac4729_peak_24378_lociStitched	chr7	16581026	16591849	2	2196	8247.13	1329.06	421	Grlf1		Grlf1	421	1
5_M00002_1_Fus1_T_CnR_ac4729_peak_22664_lociStitched	chr5	151085092	151110372	5	2265	10167.6	3273.76	422	Stard13		Stard13	422	1
4_M00002_1_Fus1_T_CnR_ac4729_peak_20502_lociStitched	chr4	141669850	141682543	4	2464	8556.35	1670.4	423		Rsc1a1,Slc25a34,Plekhm2,Ddi2	Rsc1a1	423	1
6_M00002_1_Fus1_T_CnR_ac4729_peak_16460_lociStitched	chr2	165167153	165208903	6	2284	13685.6	6801.07	424	Cdh22		Cdh22	424	1
2_M00002_1_Fus1_T_CnR_ac4729_peak_15777_lociStitched	chr2	120128081	120135219	2	1602	7819.68	941.502	425	Ehd4		Ehd4	425	1
3_M00002_1_Fus1_T_CnR_ac4729_peak_15210_lociStitched	chr2	60901509	60922842	3	2212	9685.18	2826.62	426	Rbms1	Rbms1	Rbms1	426	1
2_M00002_1_Fus1_T_CnR_ac4729_peak_13518_lociStitched	chr19	5847968	5852030	2	1693	7517.95	664.137	427	Frmd8	Slc25a45,Neat1,Malat1,Tigd3	Neat1	427	1
3_M00002_1_Fus1_T_CnR_ac4729_peak_20408_lociStitched	chr4	139268371	139287870	3	1861	9735.85	2885.85	428	Capzb	Pqlc2,Akr7a5	Pqlc2	428	1
4_M00002_1_Fus1_T_CnR_ac4729_peak_26346_lociStitched	chr8	35629631	35640111	4	2073	8295.97	1467.2	429	Mfhas1	Gm16793	Gm16793	429	1
4_M00002_1_Fus1_T_CnR_ac4729_peak_27733_lociStitched	chr9	32749363	32771581	4	2378	9269.35	2472.86	430	Ets1		Ets1	430	1
3_M00002_1_Fus1_T_CnR_ac4729_peak_15143_lociStitched	chr2	52968791	52988996	3	1987	9130.64	2341.76	431	Fmnl2		Fmnl2	431	1
3_M00002_1_Fus1_T_CnR_ac4729_peak_2932_lociStitched	chr10	84392671	84401742	3	1663	8176.6	1388.77	432	Nuak1		Nuak1	432	1
2_M00002_1_Fus1_T_CnR_ac4729_peak_4837_lociStitched	chr11	96985902	96997637	2	2013	8330.68	1547.85	433		Sp6,D030028A08Rik,Pnpo,Mrpl10,Sp2,Lrrc46,Scrn2	Sp2	433	1
4_M00002_1_Fus1_T_CnR_ac4729_peak_20269_lociStitched	chr4	133592576	133626302	4	3074	11578.1	4805.95	434	Sfn,Zdhhc18	Gpatch3,Gpn2,Pigv,Nudc,Nr0b2	Sfn	434	1
2_M00002_1_Fus1_T_CnR_ac4729_peak_10338_lociStitched	chr16	4601162	4604423	2	1575	7224.09	477.41	435	Glis2	Vasn,Tfap4,Pam16	Glis2	435	1
4_M00002_1_Fus1_T_CnR_ac4729_peak_11731_lociStitched	chr17	31746587	31761802	4	2265	8722.76	1990.12	436			Cryaa	436	1
2_M00002_1_Fus1_T_CnR_ac4729_peak_20670_lociStitched	chr4	154445103	154456553	2	680	8107.74	1377.43	437	Prdm16		Arhgef16	437	1
3_M00002_1_Fus1_T_CnR_ac4729_peak_25504_lociStitched	chr7	112375962	112391952	3	2942	8971.99	2248.19	438	Micalcl	Parva	Micalcl	438	1
4_M00002_1_Fus1_T_CnR_ac4729_peak_17558_lociStitched	chr3	68508389	68535064	4	3074	10670	3947.9	439	Schip1,Gm21949	Schip1	Schip1	439	1
1_M00002_1_Fus1_T_CnR_ac4729_peak_13087_lociStitched	chr18	60631504	60633557	1	2054	7049.39	329.712	440		Myoz3,Synpo,G630071F17Rik	Synpo	440	1
2_M00002_1_Fus1_T_CnR_ac4729_peak_6509_lociStitched	chr12	109051016	109054719	2	2497	7447.84	729.861	441	Begain		Begain	441	1
4_M00002_1_Fus1_T_CnR_ac4729_peak_25065_lociStitched	chr7	80773804	80789554	4	2021	8443.58	1738.8	442	Iqgap1		Iqgap1	442	1
2_M00002_1_Fus1_T_CnR_ac4729_peak_19645_lociStitched	chr4	88503132	88516379	2	2757	8487.35	1788.35	443		Gm12597,Ifnb1	Ifnb1	443	1
1_M00002_1_Fus1_T_CnR_ac4729_peak_877_lociStitched	chr1	90205303	90207965	1	2663	7088.64	391.58	444	Cxcr7	Cxcr7	Cxcr7	444	1
5_M00002_1_Fus1_T_CnR_ac4729_peak_14727_lociStitched	chr2	30441934	30470756	5	2153	11338.6	4646.11	445	Ppp2r4	Crat,Dolpp1,Ier5l	Ier5l	445	1
5_M00002_1_Fus1_T_CnR_ac4729_peak_3371_lociStitched	chr10	126953165	126972810	5	3448	9675.16	2995.86	446		Ctdsp2,Mir26a-2,Mir546,Avil	Ctdsp2	446	1
3_M00002_1_Fus1_T_CnR_ac4729_peak_28264_lociStitched	chr9	67036934	67042033	3	1619	7312.48	635.335	447	Tpm1		Tpm1	447	1
3_M00002_1_Fus1_T_CnR_ac4729_peak_28791_lociStitched	chr9	110706835	110710113	3	1858	7036.23	360.58	448	Ccdc12	Pth1r	Pth1r	448	1
2_M00002_1_Fus1_T_CnR_ac4729_peak_10031_lociStitched	chr15	83655165	83662703	2	2045	8016.66	1349.3	449	Scube1		Ttll12	449	1
1_M00002_1_Fus1_T_CnR_ac4729_peak_19332_lociStitched	chr4	57152754	57154573	1	1820	6940.39	279.58	450		Epb4.1l4b,Gm12530	Epb4.1l4b	450	1
3_M00002_1_Fus1_T_CnR_ac4729_peak_15205_lociStitched	chr2	60851332	60864989	3	2634	8770.53	2115.47	451	Rbms1		Rbms1	451	1
3_M00002_1_Fus1_T_CnR_ac4729_peak_16749_lociStitched	chr2	178737391	178759006	3	2267	9927.77	3291.96	452			Cdh26	452	1
2_M00002_1_Fus1_T_CnR_ac4729_peak_20672_lociStitched	chr4	154470734	154472887	2	1911	6770.75	136.931	453	Prdm16		5930403L14Rik	453	1
1_M00002_1_Fus1_T_CnR_ac4729_peak_10283_lociStitched	chr15	102258129	102260192	1	2064	6935.19	333.793	454		Rarg,Espl1,Zfp740,Itgb7,Mfsd5	Rarg	454	1
3_M00002_1_Fus1_T_CnR_ac4729_peak_274_lociStitched	chr1	39887859	39896361	3	2060	7940.87	1361.17	455		Map4k4,1700066B17Rik	Map4k4	455	1
2_M00002_1_Fus1_T_CnR_ac4729_peak_9762_lociStitched	chr15	74961044	74968630	2	1640	7497.24	918.665	456		Ly6e,Ly6i,Ly6a	Ly6e	456	1
5_M00002_1_Fus1_T_CnR_ac4729_peak_18760_lociStitched	chr3	151116137	151135941	5	2508	9198.96	2627.99	457			Eltd1	457	1
3_M00002_1_Fus1_T_CnR_ac4729_peak_25507_lociStitched	chr7	112454802	112472718	3	2077	9282.28	2712.48	458	Parva		Parva	458	1
4_M00002_1_Fus1_T_CnR_ac4729_peak_22615_lociStitched	chr5	148361527	148393507	4	2154	10812.4	4266.13	459	Slc7a1		Slc7a1	459	1
2_M00002_1_Fus1_T_CnR_ac4729_peak_12018_lociStitched	chr17	56359935	56366212	2	2302	7271.9	741.941	460	Kdm4b		Kdm4b	460	1
3_M00002_1_Fus1_T_CnR_ac4729_peak_23514_lociStitched	chr6	88924544	88939716	3	1738	8824.04	2297.04	461		Mcm2,Tpra1	Tpra1	461	1
2_M00002_1_Fus1_T_CnR_ac4729_peak_27129_lociStitched	chr8	108717653	108723246	2	1132	7297.75	773.512	462	Zfhx3		Zfhx3	462	1
4_M00002_1_Fus1_T_CnR_ac4729_peak_23791_lociStitched	chr6	113012079	113039047	4	3180	10433.9	3915.75	463		Gt(ROSA)26Sor,Thumpd3,Setd5	Thumpd3	463	1
2_M00002_1_Fus1_T_CnR_ac4729_peak_27842_lociStitched	chr9	41876631	41890985	2	2331	8457.38	1952.14	464			Sorl1	464	1
4_M00002_1_Fus1_T_CnR_ac4729_peak_8836_lociStitched	chr14	76600333	76623705	4	1784	9734.44	3232.35	465		Serp2	Serp2	465	1
7_M00002_1_Fus1_T_CnR_ac4729_peak_9886_lociStitched	chr15	78952984	79004424	7	3957	14547.2	8060.65	466	Triobp,Gm10865	H1f0,Lgals1,Nol12,Gcat,Galr3,Pdxp	Triobp	466	1
3_M00002_1_Fus1_T_CnR_ac4729_peak_10634_lociStitched	chr16	25407033	25426107	3	2399	8003.45	1522.11	467	Tprg		Tprg	467	1
2_M00002_1_Fus1_T_CnR_ac4729_peak_22457_lociStitched	chr5	139795228	139797593	2	1528	6967.29	493.575	468	Mafk	Tmem184a,Ints1,Psmg3	Mafk	468	1
3_M00002_1_Fus1_T_CnR_ac4729_peak_20584_lociStitched	chr4	149875334	149894184	3	2050	9310.01	2846.35	469			Spsb1	469	1
3_M00002_1_Fus1_T_CnR_ac4729_peak_27137_lociStitched	chr8	108886875	108898013	3	2448	7649.58	1191.77	470	Zfhx3	Mir3108	Mir3108	470	1
3_M00002_1_Fus1_T_CnR_ac4729_peak_3310_lociStitched	chr10	120417298	120429122	3	1794	8048.6	1600.97	471	Hmga2	9230105E05Rik	9230105E05Rik	471	1
2_M00002_1_Fus1_T_CnR_ac4729_peak_27563_lociStitched	chr9	13483753	13498167	2	2556	8315.44	1868.05	472			Phxr4	472	1
2_M00002_1_Fus1_T_CnR_ac4729_peak_25762_lociStitched	chr7	130645738	130654982	2	2212	7626.3	1184.16	473	Tacc2	Tacc2	Tacc2	473	1
3_M00002_1_Fus1_T_CnR_ac4729_peak_15543_lociStitched	chr2	93416315	93431534	3	1903	8642.87	2211.32	474	Gm13807,Cd82	Gm10804,Cd82	Gm13807	474	1
3_M00002_1_Fus1_T_CnR_ac4729_peak_9835_lociStitched	chr15	77245667	77256757	3	1148	7760.78	1331.91	475	Rbfox2		Rbfox2	475	1
2_M00002_1_Fus1_T_CnR_ac4729_peak_27851_lociStitched	chr9	42460801	42463903	2	1506	6709.94	290.037	476	Tbcel		Tbcel	476	1
3_M00002_1_Fus1_T_CnR_ac4729_peak_12491_lociStitched	chr18	5142432	5163165	3	3137	8977.39	2566.75	477			Svil	477	1
2_M00002_1_Fus1_T_CnR_ac4729_peak_23411_lociStitched	chr6	84923399	84933982	2	1627	7794.38	1388.49	478	Exoc6b		Exoc6b	478	1
4_M00002_1_Fus1_T_CnR_ac4729_peak_2635_lociStitched	chr10	68238913	68249762	4	3113	7709.3	1304.05	479	Arid5b		Arid5b	479	1
3_M00002_1_Fus1_T_CnR_ac4729_peak_20261_lociStitched	chr4	133396026	133416159	3	1495	8784.03	2385.76	480	Slc9a1	Mir5122	Mir5122	480	1
3_M00002_1_Fus1_T_CnR_ac4729_peak_8126_lociStitched	chr14	14632461	14647639	3	2459	8053.45	1678.69	481			Slc4a7	481	1
2_M00002_1_Fus1_T_CnR_ac4729_peak_20808_lociStitched	chr5	3340911	3350874	2	2186	8476.52	2107.17	482	Cdk6		Cdk6	482	1
5_M00002_1_Fus1_T_CnR_ac4729_peak_2472_lociStitched	chr10	58331630	58354782	5	2686	9036.23	2674.06	483	Lims1	Lims1	Lims1	483	1
5_M00002_1_Fus1_T_CnR_ac4729_peak_831_lociStitched	chr1	87871493	87900164	5	3313	10060.7	3698.56	484	Dgkd		Dgkd	484	1
3_M00002_1_Fus1_T_CnR_ac4729_peak_25541_lociStitched	chr7	113139289	113151929	3	2896	8362.62	2002.18	485	4930543E12Rik		4930543E12Rik	485	1
3_M00002_1_Fus1_T_CnR_ac4729_peak_12514_lociStitched	chr18	5919206	5945465	3	2947	10185.9	3825.94	486			Arhgap12	486	1
4_M00002_1_Fus1_T_CnR_ac4729_peak_6249_lociStitched	chr12	86091166	86109679	4	1955	8562.26	2212.3	487	Ift43	Tgfb3	Ift43	487	1
2_M00002_1_Fus1_T_CnR_ac4729_peak_18218_lociStitched	chr3	109468641	109478549	2	2795	8075.02	1730.93	488	Vav3		Vav3	488	1
2_M00002_1_Fus1_T_CnR_ac4729_peak_4257_lociStitched	chr11	62911272	62921806	2	2951	8026.91	1685.44	489		Cdrt4,Tvp23b	Cdrt4	489	1
2_M00002_1_Fus1_T_CnR_ac4729_peak_12588_lociStitched	chr18	12004600	12013438	2	2541	7278.98	974.831	490	Tmem241		Tmem241	490	1
2_M00002_1_Fus1_T_CnR_ac4729_peak_10920_lociStitched	chr16	46094372	46102724	2	2037	7395.7	1093.28	491	Cd96		Cd96	491	1
2_M00002_1_Fus1_T_CnR_ac4729_peak_20011_lociStitched	chr4	120248766	120254697	2	2331	7091.7	808.988	492		Foxo6	Foxo6	492	1
3_M00002_1_Fus1_T_CnR_ac4729_peak_10012_lociStitched	chr15	83215780	83224091	3	1943	7579.63	1317.29	493		Cyb5r3,A4galt	A4galt	493	1
1_M00002_1_Fus1_T_CnR_ac4729_peak_13088_lociStitched	chr18	60647850	60649523	1	1674	6517	295.786	494		Synpo,G630071F17Rik	G630071F17Rik	494	1
3_M00002_1_Fus1_T_CnR_ac4729_peak_3587_lociStitched	chr11	8652846	8659265	3	1130	7096.85	878.761	495	Tns3		Tns3	495	1
6_M00002_1_Fus1_T_CnR_ac4729_peak_20245_lociStitched	chr4	133066762	133093775	6	2047	9840.84	3633.25	496	Ahdc1	Wasf2	Wasf2	496	1
5_M00002_1_Fus1_T_CnR_ac4729_peak_14122_lociStitched	chr19	47447114	47459030	5	2449	8071.9	1866.05	497	Sh3pxd2a	Sh3pxd2a	Sh3pxd2a	497	1
2_M00002_1_Fus1_T_CnR_ac4729_peak_12349_lociStitched	chr17	85071513	85073528	2	1802	6589.05	397.761	498	Prepl	Slc3a1,Camkmt	Prepl	498	1
3_M00002_1_Fus1_T_CnR_ac4729_peak_18056_lociStitched	chr3	101562695	101582767	3	1958	9094.62	2932.52	499	Atp1a1		Atp1a1	499	1
4_M00002_1_Fus1_T_CnR_ac4729_peak_6712_lociStitched	chr13	5418260	5444289	4	2080	8821.23	2670.58	500			1700016G22Rik	500	1
1_M00002_1_Fus1_T_CnR_ac4729_peak_25983_lociStitched	chr7	144874254	144875685	1	1432	6333.75	204.204	501		Oraov1,Fgf4,Fgf15,Fgf3	Fgf4	501	1
2_M00002_1_Fus1_T_CnR_ac4729_peak_14786_lociStitched	chr2	31350352	31356788	2	1867	7162.62	1043.28	502			Ncs1	502	1
2_M00002_1_Fus1_T_CnR_ac4729_peak_16780_lociStitched	chr2	180214377	180218974	2	1532	6809.08	706.099	503	Lama5	Adrm1,Rps21,Mir3091	Lama5	503	1
3_M00002_1_Fus1_T_CnR_ac4729_peak_23762_lociStitched	chr6	108530748	108537321	3	1895	6988.41	896.557	504	Itpr1		0610040F04Rik	504	1
2_M00002_1_Fus1_T_CnR_ac4729_peak_15933_lociStitched	chr2	129502907	129516021	2	2170	7809.39	1725.8	505	F830045P16Rik		F830045P16Rik	505	1
3_M00002_1_Fus1_T_CnR_ac4729_peak_22929_lociStitched	chr6	31074809	31096870	3	2639	9192.82	3117.22	506		Mir29b-1,Mir29a	Mir29b-1	506	1
3_M00002_1_Fus1_T_CnR_ac4729_peak_22919_lociStitched	chr6	30673996	30678708	3	1495	6814.02	749.679	507	Tsga14	Cpa1	Tsga14	507	1
1_M00002_1_Fus1_T_CnR_ac4729_peak_6587_lociStitched	chr12	112222504	112224490	1	1987	6414.58	352.118	508			Kif26a	508	1
2_M00002_1_Fus1_T_CnR_ac4729_peak_15747_lociStitched	chr2	118749725	118751344	2	1426	6185.07	137.939	509		Phgr1,5430417L22Rik,Disp2,A430105I19Rik,Plcb2,Ankrd63	5430417L22Rik	509	1
5_M00002_1_Fus1_T_CnR_ac4729_peak_12442_lociStitched	chr17	90787018	90816124	5	2394	8731.8	2686.48	510	Nrxn1	4930480K15Rik	4930480K15Rik	510	1
3_M00002_1_Fus1_T_CnR_ac4729_peak_21277_lociStitched	chr5	35596671	35617808	3	2109	9370.03	3324.85	511	Acox3	Trmt44,4931431C16Rik	4931431C16Rik	511	1
3_M00002_1_Fus1_T_CnR_ac4729_peak_10683_lociStitched	chr16	30604608	30615238	3	1701	7285.8	1247.96	512	Mir1195	Lsg1,Fam43a	Fam43a	512	1
3_M00002_1_Fus1_T_CnR_ac4729_peak_17585_lociStitched	chr3	69518943	69536983	3	2776	8805.32	2769.14	513	Ppm1l		B3galnt1	513	1
5_M00002_1_Fus1_T_CnR_ac4729_peak_20363_lociStitched	chr4	137686306	137719554	5	2282	10589.5	4558.3	514	Rap1gap	Rap1gap	Rap1gap	514	1
3_M00002_1_Fus1_T_CnR_ac4729_peak_18697_lociStitched	chr3	145885172	145905458	3	1935	9430.96	3399.93	515	Ddah1	Bcl10,2410004B18Rik	Bcl10	515	1
2_M00002_1_Fus1_T_CnR_ac4729_peak_13572_lociStitched	chr19	7264880	7267352	2	2202	6435.36	414.06	516		Cox8a,Mark2,Naa40,Rcor2	Rcor2	516	1
2_M00002_1_Fus1_T_CnR_ac4729_peak_14933_lociStitched	chr2	35643479	35650564	2	1905	7189.15	1173.28	517	Dab2ip	Dab2ip	Dab2ip	517	1
4_M00002_1_Fus1_T_CnR_ac4729_peak_11634_lociStitched	chr17	27701762	27721677	4	2622	9250.52	3242.16	518	Pacsin1,Spdef		Spdef	518	1
5_M00002_1_Fus1_T_CnR_ac4729_peak_7394_lociStitched	chr13	60337994	60365200	5	2992	9679.89	3678.25	519			Gm5084	519	1
3_M00002_1_Fus1_T_CnR_ac4729_peak_13849_lociStitched	chr19	28580127	28592232	3	2049	7161.32	1175.4	520	Glis3		D930032P07Rik	520	1
2_M00002_1_Fus1_T_CnR_ac4729_peak_6843_lociStitched	chr13	16011943	16018593	2	1993	6696.55	710.885	521	Inhba		Inhba	521	1
3_M00002_1_Fus1_T_CnR_ac4729_peak_23610_lociStitched	chr6	93257253	93274563	3	1833	8395.35	2426.86	522			9530026P05Rik	522	1
2_M00002_1_Fus1_T_CnR_ac4729_peak_19171_lociStitched	chr4	42144371	42146302	2	1732	6362.45	400.103	523	Gm3893	Gm13306,Ccl27b,4933409K07Rik,Gm13305,Gm2002	Ccl27b	523	1
4_M00002_1_Fus1_T_CnR_ac4729_peak_16386_lociStitched	chr2	160602584	160621718	4	2687	8399.83	2445.33	524		Top1	Top1	524	1
3_M00002_1_Fus1_T_CnR_ac4729_peak_7346_lociStitched	chr13	57096862	57116595	3	3293	8514.79	2569.24	525			Trpc7	525	1
3_M00002_1_Fus1_T_CnR_ac4729_peak_4778_lociStitched	chr11	94819165	94833816	3	2117	7789.94	1854.82	526		Gm11544,Tmem92	Gm11544	526	1
3_M00002_1_Fus1_T_CnR_ac4729_peak_3682_lociStitched	chr11	19977887	19991983	3	1278	7664	1732.4	527	Spred2		Spred2	527	1
3_M00002_1_Fus1_T_CnR_ac4729_peak_6605_lociStitched	chr12	112595337	112611385	3	1474	7979.07	2055.75	528	Inf2	Adssl1,Siva1	Inf2	528	1
2_M00002_1_Fus1_T_CnR_ac4729_peak_22480_lociStitched	chr5	140163206	140176060	2	1961	7518.3	1608.04	529	Mad1l1		Mad1l1	529	1
3_M00002_1_Fus1_T_CnR_ac4729_peak_14873_lociStitched	chr2	33604336	33612291	3	2162	7055.29	1147.11	530	Lmx1b	C130021I20Rik	Lmx1b	530	1
5_M00002_1_Fus1_T_CnR_ac4729_peak_19201_lociStitched	chr4	42734428	42749963	5	1523	7529.81	1635.84	531		Gm1987,Ccl19,Ccl21a	Ccl19	531	1
3_M00002_1_Fus1_T_CnR_ac4729_peak_16227_lociStitched	chr2	152718066	152740021	3	1741	9666.79	3776.26	532	Id1	H13,Cox4i2,Mcts2	Id1	532	1
2_M00002_1_Fus1_T_CnR_ac4729_peak_19286_lociStitched	chr4	49090268	49103063	2	1817	6809.5	921.24	533	E130309F12Rik		E130309F12Rik	533	1
2_M00002_1_Fus1_T_CnR_ac4729_peak_8453_lociStitched	chr14	46956001	46967467	2	2096	6926.61	1038.82	534	Samd4	Samd4	Samd4	534	1
3_M00002_1_Fus1_T_CnR_ac4729_peak_13846_lociStitched	chr19	28548474	28561239	3	1791	7380.72	1493.51	535	Glis3		D930032P07Rik	535	1
5_M00002_1_Fus1_T_CnR_ac4729_peak_21742_lociStitched	chr5	92984773	93005905	5	2537	9080.42	3199.38	536		Sowahb	Sowahb	536	1
4_M00002_1_Fus1_T_CnR_ac4729_peak_12503_lociStitched	chr18	5603389	5620995	4	2367	7690.3	1820.46	537	Zeb1	Gm10125	Gm10125	537	1
6_M00002_1_Fus1_T_CnR_ac4729_peak_11964_lociStitched	chr17	47508249	47528101	6	2911	8887.74	3025.44	538	Ccnd3	Taf8	Ccnd3	538	1
5_M00002_1_Fus1_T_CnR_ac4729_peak_6594_lociStitched	chr12	112329578	112345737	5	2270	8719.4	2858.53	539			A730018C14Rik	539	1
4_M00002_1_Fus1_T_CnR_ac4729_peak_6740_lociStitched	chr13	6626355	6637020	4	1586	7203.14	1352.32	540	Pfkp		Pfkp	540	1
1_M00002_1_Fus1_T_CnR_ac4729_peak_20194_lociStitched	chr4	130372644	130374052	1	1409	5985.69	139.533	541	Snrnp40	Zcchc17	Snrnp40	541	1
7_M00002_1_Fus1_T_CnR_ac4729_peak_11582_lociStitched	chr17	26576975	26621569	7	2680	12548.8	6711.4	542	Ergic1		Ergic1	542	1
3_M00002_1_Fus1_T_CnR_ac4729_peak_13646_lociStitched	chr19	10294921	10297498	3	1658	6143.57	321.352	543	Dagla		Dagla	543	1
3_M00002_1_Fus1_T_CnR_ac4729_peak_10019_lociStitched	chr15	83403513	83417968	3	1936	7431.32	1610.29	544	Pacsin2	1700001L05Rik	Pacsin2	544	1
2_M00002_1_Fus1_T_CnR_ac4729_peak_13090_lociStitched	chr18	60729462	60732878	2	1553	6374.6	567.739	545		Ndst1,Rps14	Ndst1	545	1
3_M00002_1_Fus1_T_CnR_ac4729_peak_20046_lociStitched	chr4	123588570	123595571	3	2259	6592.14	786.912	546	Macf1		Macf1	546	1
3_M00002_1_Fus1_T_CnR_ac4729_peak_1939_lociStitched	chr10	8747309	8762366	3	2163	7642.93	1841.47	547	Sash1		Sash1	547	1
3_M00002_1_Fus1_T_CnR_ac4729_peak_21726_lociStitched	chr5	92745616	92763709	3	3171	7857.79	2058.98	548	Shroom3	Mir1961,Shroom3	Mir1961	548	1
3_M00002_1_Fus1_T_CnR_ac4729_peak_27308_lociStitched	chr8	120212952	120226153	3	2710	7561.53	1766.29	549		Fam92b	Fam92b	549	1
4_M00002_1_Fus1_T_CnR_ac4729_peak_12276_lociStitched	chr17	80795542	80809633	4	2415	7199.09	1404.87	550			Map4k3	550	1
4_M00002_1_Fus1_T_CnR_ac4729_peak_16993_lociStitched	chr3	27515137	27538759	4	1318	9517.3	3729.91	551	Fndc3b	Mir3092	Mir3092	551	1
4_M00002_1_Fus1_T_CnR_ac4729_peak_23193_lociStitched	chr6	53294628	53320046	4	1976	9107.27	3332.3	552	9430076C15Rik		9430076C15Rik	552	1
2_M00002_1_Fus1_T_CnR_ac4729_peak_27042_lociStitched	chr8	105474245	105484878	2	1462	7384.62	1610.9	553	Zdhhc1	Tppp3,Hsd11b2,Lrrc36	Tppp3	553	1
5_M00002_1_Fus1_T_CnR_ac4729_peak_578_lociStitched	chr1	72815487	72833564	5	2242	7923.15	2160.2	554	Igfbp2	Igfbp5	Igfbp2	554	1
3_M00002_1_Fus1_T_CnR_ac4729_peak_1754_lociStitched	chr1	185731543	185747720	3	2032	8211.45	2449.2	555	Mir297c		Mir297c	555	1
3_M00002_1_Fus1_T_CnR_ac4729_peak_25358_lociStitched	chr7	101464601	101472672	3	1742	6954.78	1192.89	556	Pde2a	Pde2a,Mir139	Mir139	556	1
3_M00002_1_Fus1_T_CnR_ac4729_peak_14174_lociStitched	chr19	53306802	53326352	3	2508	8402.59	2643.16	557	Mxi1	Mxi1	Mxi1	557	1
4_M00002_1_Fus1_T_CnR_ac4729_peak_19686_lociStitched	chr4	89469465	89486319	4	3071	7865.76	2106.75	558			Cdkn2b	558	1
3_M00002_1_Fus1_T_CnR_ac4729_peak_22900_lociStitched	chr6	30101457	30121815	3	2829	8454.68	2699.47	559	Nrf1	Mir182,Mir183,Mir96	Nrf1	559	1
4_M00002_1_Fus1_T_CnR_ac4729_peak_25921_lociStitched	chr7	142392722	142415638	4	2415	8570.58	2823.25	560		Syt8,Ctsd,Lsp1,Ifitm10,Tnni2	Ctsd	560	1
2_M00002_1_Fus1_T_CnR_ac4729_peak_20304_lociStitched	chr4	135298003	135308342	2	2556	7507.15	1771.07	561		Clic4,Srrm1	Clic4	561	1
2_M00002_1_Fus1_T_CnR_ac4729_peak_13309_lociStitched	chr18	75404484	75410544	2	2420	6746.6	1033.84	562		Smad7	Smad7	562	1
2_M00002_1_Fus1_T_CnR_ac4729_peak_19150_lociStitched	chr4	41780545	41794354	2	1683	7154.44	1444.42	563		Ccl27a,Sigmar1,Galt,Arid3c,Il11ra1	Ccl27a	563	1
1_M00002_1_Fus1_T_CnR_ac4729_peak_3862_lociStitched	chr11	32382772	32384703	1	1932	6191.75	485.453	564	Sh3pxd2b		Sh3pxd2b	564	1
2_M00002_1_Fus1_T_CnR_ac4729_peak_14053_lociStitched	chr19	44766952	44771147	2	1347	6469.95	774.817	565	Pax2		Pax2	565	1
2_M00002_1_Fus1_T_CnR_ac4729_peak_1666_lociStitched	chr1	179863058	179877322	2	2197	7304.59	1620.39	566			Ahctf1	566	1
2_M00002_1_Fus1_T_CnR_ac4729_peak_27008_lociStitched	chr8	104102882	104114981	2	1610	7370.71	1686.6	567	Cdh5		Cdh5	567	1
3_M00002_1_Fus1_T_CnR_ac4729_peak_10342_lociStitched	chr16	4651562	4659443	3	1075	6619.25	935.475	568	Coro7	Vasn,Dnaja3,Pam16	Vasn	568	1
4_M00002_1_Fus1_T_CnR_ac4729_peak_22429_lociStitched	chr5	138932422	138949820	4	2020	8443.25	2761.06	569		Pdgfa	Pdgfa	569	1
2_M00002_1_Fus1_T_CnR_ac4729_peak_7608_lociStitched	chr13	83201677	83209104	2	3009	6410.99	734.53	570			Mef2c	570	1
3_M00002_1_Fus1_T_CnR_ac4729_peak_23325_lociStitched	chr6	72673163	72687265	3	1742	7445.86	1774.03	571	Tcf7l1	Gm15401	Gm15401	571	1
2_M00002_1_Fus1_T_CnR_ac4729_peak_17448_lociStitched	chr3	60493943	60503833	2	2208	7240.47	1571.52	572	Mbnl1		Mbnl1	572	1
2_M00002_1_Fus1_T_CnR_ac4729_peak_7048_lociStitched	chr13	34238698	34249884	2	2324	6997.96	1332.25	573	Slc22a23		Psmg4	573	1
2_M00002_1_Fus1_T_CnR_ac4729_peak_22535_lociStitched	chr5	143048886	143059462	2	998	7468.77	1809.55	574	Rnf216		Rnf216	574	1
4_M00002_1_Fus1_T_CnR_ac4729_peak_6827_lociStitched	chr13	15591196	15625161	4	1900	10274.4	4615.84	575	Gli3		Gli3	575	1
3_M00002_1_Fus1_T_CnR_ac4729_peak_21049_lociStitched	chr5	24469002	24488359	3	2038	8549.99	2893.87	576	Agap3	Slc4a2,Fastk,Tmub1,Cdk5,Gbx1	Agap3	576	1
2_M00002_1_Fus1_T_CnR_ac4729_peak_12801_lociStitched	chr18	35837185	35848739	2	1663	7227.03	1579.43	577	Cxxc5		Cxxc5	577	1
3_M00002_1_Fus1_T_CnR_ac4729_peak_11532_lociStitched	chr17	25373478	25386710	3	2395	8116.51	2475.71	578	Tpsg1,Cacna1h	Tpsb2,Tpsab1,Cacna1h	Tpsg1	578	1
5_M00002_1_Fus1_T_CnR_ac4729_peak_2045_lociStitched	chr10	17542416	17576578	5	3495	9924.06	4294.16	579			Cited2	579	1
4_M00002_1_Fus1_T_CnR_ac4729_peak_3319_lociStitched	chr10	120602801	120624430	4	2346	8333.65	2707.95	580			Hmga2	580	1
5_M00002_1_Fus1_T_CnR_ac4729_peak_7239_lociStitched	chr13	49466904	49493083	5	2197	8924.42	3303.79	581	Cenpp	Ippk,Ecm2	Ecm2	581	1
2_M00002_1_Fus1_T_CnR_ac4729_peak_23671_lociStitched	chr6	97816213	97829767	2	1655	7652.59	2033.1	582	Mitf		Mitf	582	1
1_M00002_1_Fus1_T_CnR_ac4729_peak_924_lociStitched	chr1	91977675	91979257	1	1583	5797.87	180.032	583	Hdac4		Hdac4	583	1
3_M00002_1_Fus1_T_CnR_ac4729_peak_4181_lociStitched	chr11	59694369	59708368	3	2058	7304.68	1693.88	584	Mprip	1700007J10Rik	1700007J10Rik	584	1
2_M00002_1_Fus1_T_CnR_ac4729_peak_1901_lociStitched	chr10	5287787	5295405	2	2474	6531.67	934.729	585			Syne1	585	1
3_M00002_1_Fus1_T_CnR_ac4729_peak_3627_lociStitched	chr11	12381065	12397407	3	1853	7782.06	2188.19	586	Cobl		Cobl	586	1
2_M00002_1_Fus1_T_CnR_ac4729_peak_17016_lociStitched	chr3	27858949	27863796	2	1236	6533.76	943.226	587		Tmem212	Tmem212	587	1
2_M00002_1_Fus1_T_CnR_ac4729_peak_14782_lociStitched	chr2	31255526	31264754	2	2508	7071.42	1487.55	588	Ncs1		Ncs1	588	1
2_M00002_1_Fus1_T_CnR_ac4729_peak_12333_lociStitched	chr17	84600015	84609576	2	1436	6653.5	1089.95	589	Plekhh2	Dync2li1	Dync2li1	589	1
3_M00002_1_Fus1_T_CnR_ac4729_peak_1451_lociStitched	chr1	162037271	162053786	3	2483	7387.16	1826.56	590	Dnm3	2810442N19Rik	2810442N19Rik	590	1
3_M00002_1_Fus1_T_CnR_ac4729_peak_8130_lociStitched	chr14	14684750	14692934	3	2843	6512.01	955.073	591		Slc4a7	Slc4a7	591	1
5_M00002_1_Fus1_T_CnR_ac4729_peak_12853_lociStitched	chr18	38255377	38276998	5	2005	7997.61	2456.15	592	Pcdh12,0610009O20Rik	Pcdh1,Rnf14,1700086O06Rik	1700086O06Rik	592	1
3_M00002_1_Fus1_T_CnR_ac4729_peak_18162_lociStitched	chr3	107766160	107777082	3	2028	7310.09	1769.36	593		Csf1	Csf1	593	1
2_M00002_1_Fus1_T_CnR_ac4729_peak_16643_lociStitched	chr2	170628564	170639298	2	2109	6833.26	1295.59	594		4930470P17Rik	4930470P17Rik	594	1
5_M00002_1_Fus1_T_CnR_ac4729_peak_26942_lociStitched	chr8	94249595	94282709	5	3152	9864.66	4347.87	595	Nup93	Mir138-2,Slc12a3	Nup93	595	1
2_M00002_1_Fus1_T_CnR_ac4729_peak_5499_lociStitched	chr12	16841124	16854429	2	1655	6895.98	1382.39	596		E2f6,Rock2,Greb1	E2f6	596	1
2_M00002_1_Fus1_T_CnR_ac4729_peak_19565_lociStitched	chr4	82535853	82540200	2	1691	6099.71	599.886	597		Nfib	Nfib	597	1
3_M00002_1_Fus1_T_CnR_ac4729_peak_10959_lociStitched	chr16	50189397	50206818	3	1928	7543.29	2043.48	598	Bbx		Gm4827	598	1
3_M00002_1_Fus1_T_CnR_ac4729_peak_15764_lociStitched	chr2	119491594	119514574	3	1945	8509.49	3021.87	599		Ino80,Chp1,Exd1	Ino80	599	1
3_M00002_1_Fus1_T_CnR_ac4729_peak_5432_lociStitched	chr12	12509064	12528504	3	2594	7713.79	2233.66	600			4921511I17Rik	600	1
3_M00002_1_Fus1_T_CnR_ac4729_peak_11704_lociStitched	chr17	30053755	30076387	3	2383	8281.05	2817.68	601	Zfand3		Zfand3	601	1
2_M00002_1_Fus1_T_CnR_ac4729_peak_25260_lociStitched	chr7	98103474	98117397	2	1714	7167.56	1709.74	602	Myo7a	Myo7a,Omp	Myo7a	602	1
2_M00002_1_Fus1_T_CnR_ac4729_peak_15348_lociStitched	chr2	75609409	75613983	2	1759	6048.2	610.172	603		Gm6793,Hnrnpa3	Hnrnpa3	603	1
3_M00002_1_Fus1_T_CnR_ac4729_peak_11096_lociStitched	chr16	77500045	77506762	3	1663	6187.03	761.036	604	2810055G20Rik		Mir99a	604	1
2_M00002_1_Fus1_T_CnR_ac4729_peak_5339_lociStitched	chr11	120627043	120629187	2	1302	5939.74	520.349	605	Mafg	Myadml2,Npb,Pcyt2,Anapc11,Notum,Pycr1,Aspscr1,Sirt7,Arhgdia,Alyref	Sirt7	605	1
2_M00002_1_Fus1_T_CnR_ac4729_peak_27326_lociStitched	chr8	120555911	120564665	2	2847	6840.38	1435.66	606	Gse1	Gins2	Gse1	606	1
5_M00002_1_Fus1_T_CnR_ac4729_peak_27283_lociStitched	chr8	119708892	119733974	5	2550	8347.29	2944.63	607	Atp2c2	Wfdc1,Tldc1	Atp2c2	607	1
3_M00002_1_Fus1_T_CnR_ac4729_peak_16439_lociStitched	chr2	164432365	164439664	3	1636	6539.9	1143.75	608	Sdc4	Matn4,Dbndd2,Rbpjl,Sys1,Trp53tg5	Sdc4	608	1
1_M00002_1_Fus1_T_CnR_ac4729_peak_17088_lociStitched	chr3	32495559	32497074	1	1516	5656.71	261.943	609		Zfp639,Kcnmb3,Mfn1	Kcnmb3	609	1
3_M00002_1_Fus1_T_CnR_ac4729_peak_16356_lociStitched	chr2	157445767	157448538	3	1602	5814.39	422.3	610	Src	Src	Src	610	1
2_M00002_1_Fus1_T_CnR_ac4729_peak_29290_lociStitched	chrX	99198006	99199983	2	1774	5569.21	186.036	611			Efnb1	611	1
2_M00002_1_Fus1_T_CnR_ac4729_peak_8693_lociStitched	chr14	66460267	66473582	2	2375	7344.55	1963.96	612			Stmn4	612	1
1_M00002_1_Fus1_T_CnR_ac4729_peak_28533_lociStitched	chr9	91350371	91352359	1	1989	5606.36	244.524	613		Zic4,Zic1	Zic1	613	1
2_M00002_1_Fus1_T_CnR_ac4729_peak_22077_lociStitched	chr5	115509721	115515459	2	1531	6382.38	1031.69	614	Pxn	Sirt4,Pla2g1b,Rplp0,Gcn1l1	Pxn	614	1
7_M00002_1_Fus1_T_CnR_ac4729_peak_25519_lociStitched	chr7	112595267	112646187	7	3573	11961.1	6614.51	615		Tead1	Tead1	615	1
3_M00002_1_Fus1_T_CnR_ac4729_peak_17617_lociStitched	chr3	79152659	79161833	3	1624	6760.32	1415.55	616		Rapgef2	Rapgef2	616	1
4_M00002_1_Fus1_T_CnR_ac4729_peak_1287_lociStitched	chr1	143918729	143947165	4	2536	8476.77	3150.71	617			Rgs2	617	1
3_M00002_1_Fus1_T_CnR_ac4729_peak_24528_lociStitched	chr7	28796609	28809454	3	2983	6897.77	1583.79	618	Rinl	Lgals4,Lgals6,Ech1,Hnrnpl,Gm19897,Nfkbib,Gm6537,Sirt2	Hnrnpl	618	1
3_M00002_1_Fus1_T_CnR_ac4729_peak_22250_lociStitched	chr5	125069380	125081821	3	1732	7100.08	1797.72	619	Ncor2		Fam101a	619	1
2_M00002_1_Fus1_T_CnR_ac4729_peak_14237_lociStitched	chr19	57012741	57017317	2	1215	5874.67	573.373	620		Afap1l2	Afap1l2	620	1
3_M00002_1_Fus1_T_CnR_ac4729_peak_28190_lociStitched	chr9	64058057	64068366	3	1592	6376.12	1096.88	621		1110036E04Rik,2600006L11Rik,1700055C04Rik,Lctl,Smad6	1110036E04Rik	621	1
2_M00002_1_Fus1_T_CnR_ac4729_peak_16978_lociStitched	chr3	25143580	25146133	2	2013	5569.37	292.574	622				622	1
1_M00002_1_Fus1_T_CnR_ac4729_peak_11588_lociStitched	chr17	26688287	26689958	1	1672	5577.3	313.814	623	Atp6v0e	Crebrf	Atp6v0e	623	1
2_M00002_1_Fus1_T_CnR_ac4729_peak_1671_lociStitched	chr1	180249887	180253924	2	2355	5869.39	608.78	624	Psen2	Psen2	Psen2	624	1
2_M00002_1_Fus1_T_CnR_ac4729_peak_9147_lociStitched	chr15	8659458	8669094	2	1848	6612.22	1353.86	625	Slc1a3		Slc1a3	625	1
2_M00002_1_Fus1_T_CnR_ac4729_peak_19244_lociStitched	chr4	45033750	45046241	2	2003	6867.55	1613.84	626	Fbxo10	Polr1e,Zbtb5	Polr1e	626	1
5_M00002_1_Fus1_T_CnR_ac4729_peak_8364_lociStitched	chr14	31661235	31670614	5	2007	6314.88	1061.7	627	Btd	Hacl1	Btd	627	1
2_M00002_1_Fus1_T_CnR_ac4729_peak_1702_lociStitched	chr1	182497700	182509489	2	1134	6860.02	1608.02	628	Capn2		Capn2	628	1
2_M00002_1_Fus1_T_CnR_ac4729_peak_2774_lociStitched	chr10	79539182	79548278	2	1612	6788.34	1549.05	629	Mier2	Theg,Ppap2c	Ppap2c	629	1
1_M00002_1_Fus1_T_CnR_ac4729_peak_25054_lociStitched	chr7	80399901	80401693	1	1793	5653.58	423.629	630	Furin	Fes,Man2a2	Furin	630	1
4_M00002_1_Fus1_T_CnR_ac4729_peak_23182_lociStitched	chr6	52828334	52861599	4	1313	9789.89	4560.63	631	Jazf1		Jazf1	631	1
3_M00002_1_Fus1_T_CnR_ac4729_peak_10529_lociStitched	chr16	18459661	18473996	3	1465	7075.76	1850.65	632	Txnrd2	Comt,Gnb1l	Gnb1l	632	1
3_M00002_1_Fus1_T_CnR_ac4729_peak_16745_lociStitched	chr2	178636770	178652095	3	2523	7176.7	1955.47	633			Cdh26	633	1
2_M00002_1_Fus1_T_CnR_ac4729_peak_18125_lociStitched	chr3	104937822	104945449	2	1715	6506.59	1288.2	634	Wnt2b		Wnt2b	634	1
5_M00002_1_Fus1_T_CnR_ac4729_peak_27934_lociStitched	chr9	46175055	46216157	5	2143	10431.7	5215.84	635	Sik3	Apoa1,Apoc3,Apoa4	Apoa1	635	1
2_M00002_1_Fus1_T_CnR_ac4729_peak_27838_lociStitched	chr9	41804533	41809489	2	1459	6051.28	846.485	636			Mir125b-1	636	1
2_M00002_1_Fus1_T_CnR_ac4729_peak_17620_lociStitched	chr3	79180957	79193002	2	2033	6930.69	1726.05	637		4921511C10Rik,Rapgef2	4921511C10Rik	637	1
2_M00002_1_Fus1_T_CnR_ac4729_peak_3369_lociStitched	chr10	126928309	126931429	2	1940	5853.74	650.52	638		Ctdsp2,Xrcc6bp1	Xrcc6bp1	638	1
4_M00002_1_Fus1_T_CnR_ac4729_peak_1178_lociStitched	chr1	134209997	134222699	4	2367	6752.38	1553.45	639	Adora1	Chi3l1,Mybph	Adora1	639	1
2_M00002_1_Fus1_T_CnR_ac4729_peak_3470_lociStitched	chr11	3365840	3375061	2	2219	6211.27	1041.97	640	Limk2,Mir3470a	Limk2,Pik3ip1	Limk2	640	1
3_M00002_1_Fus1_T_CnR_ac4729_peak_10747_lociStitched	chr16	32853457	32865884	3	1950	6384.99	1216.6	641	1700021K19Rik	Gm933,1700021K19Rik,Fyttd1,Lrch3	1700021K19Rik	641	1
2_M00002_1_Fus1_T_CnR_ac4729_peak_16319_lociStitched	chr2	156623620	156626733	2	1622	5743.48	578.395	642	Dlgap4	Gm14169	Dlgap4	642	1
3_M00002_1_Fus1_T_CnR_ac4729_peak_1448_lociStitched	chr1	162008673	162021380	3	1454	6893.55	1731.96	643	Dnm3,2810442N19Rik	4930558K02Rik,Pigc	2810442N19Rik	643	1
3_M00002_1_Fus1_T_CnR_ac4729_peak_28671_lociStitched	chr9	106304627	106325764	3	2844	7812.24	2652.69	644	Poc1a	Dusp7	Poc1a	644	1
4_M00002_1_Fus1_T_CnR_ac4729_peak_15140_lociStitched	chr2	52943957	52955966	4	1301	6627.77	1473.5	645	Fmnl2		Fmnl2	645	1
3_M00002_1_Fus1_T_CnR_ac4729_peak_27581_lociStitched	chr9	14089779	14105404	3	2631	6907.81	1754.69	646			Sesn3	646	1
3_M00002_1_Fus1_T_CnR_ac4729_peak_9739_lociStitched	chr15	73730256	73738810	3	2393	6128.94	983.71	647	Ptp4a3	Ptp4a3,Gpr20	Ptp4a3	647	1
5_M00002_1_Fus1_T_CnR_ac4729_peak_1131_lociStitched	chr1	132583256	132596178	5	2602	7109.68	1966.73	648	Nfasc	Cntn2	Cntn2	648	1
2_M00002_1_Fus1_T_CnR_ac4729_peak_22073_lociStitched	chr5	115434816	115437121	2	2066	5410.53	270.146	649	Msi1	Sirt4,Pla2g1b	Msi1	649	1
5_M00002_1_Fus1_T_CnR_ac4729_peak_25276_lociStitched	chr7	98497562	98523764	5	2800	8615.22	3477.01	650	Lrrc32		Lrrc32	650	1
2_M00002_1_Fus1_T_CnR_ac4729_peak_10406_lociStitched	chr16	10780323	10782768	2	2035	5489.02	355.503	651		Socs1,Prm2,Prm3,Tnp2,Prm1	Socs1	651	1
2_M00002_1_Fus1_T_CnR_ac4729_peak_8272_lociStitched	chr14	25371380	25379302	2	1964	6196.59	1064.72	652			Zmiz1	652	1
4_M00002_1_Fus1_T_CnR_ac4729_peak_14790_lociStitched	chr2	31427379	31449775	4	1901	8508.24	3377.32	653		Ass1,Gm5424	Ass1	653	1
4_M00002_1_Fus1_T_CnR_ac4729_peak_1972_lociStitched	chr10	12837583	12869564	4	2795	9216.92	4087.17	654	Utrn		Utrn	654	1
4_M00002_1_Fus1_T_CnR_ac4729_peak_298_lociStitched	chr1	43224285	43242003	4	2525	6980.89	1867.48	655			Fhl2	655	1
1_M00002_1_Fus1_T_CnR_ac4729_peak_23037_lociStitched	chr6	38180761	38181940	1	1180	5283.45	179.798	656	D630045J12Rik		Atp6v0a4	656	1
2_M00002_1_Fus1_T_CnR_ac4729_peak_18159_lociStitched	chr3	107740558	107751827	2	1006	6925.93	1823.32	657	Csf1	Ahcyl1	Csf1	657	1
3_M00002_1_Fus1_T_CnR_ac4729_peak_1738_lociStitched	chr1	184905990	184918816	3	2803	6472	1385.21	658	Mark1	C130074G19Rik	C130074G19Rik	658	1
5_M00002_1_Fus1_T_CnR_ac4729_peak_11324_lociStitched	chr17	6164619	6180399	5	2611	7198.84	2112.94	659	Tulp4		Tulp4	659	1
3_M00002_1_Fus1_T_CnR_ac4729_peak_28863_lociStitched	chr9	118753812	118775255	3	2107	7833.13	2755.43	660	Itga9		Itga9	660	1
3_M00002_1_Fus1_T_CnR_ac4729_peak_27425_lociStitched	chr8	124954608	124970592	3	2486	6818.77	1747.05	661		Tsnax,Egln1	Egln1	661	1
1_M00002_1_Fus1_T_CnR_ac4729_peak_13976_lociStitched	chr19	38154691	38156541	1	1851	5277.31	207.755	662	Pde6c	Rbp4	Pde6c	662	1
5_M00002_1_Fus1_T_CnR_ac4729_peak_27166_lociStitched	chr8	110793750	110815711	5	2051	8338.59	3283.17	663	Il34,Sf3b3	Snord111,Cog4	Il34	663	1
2_M00002_1_Fus1_T_CnR_ac4729_peak_28534_lociStitched	chr9	91380524	91382860	2	2091	5175.17	126.611	664	Zic4	Zic1	Zic4	664	1
2_M00002_1_Fus1_T_CnR_ac4729_peak_11898_lociStitched	chr17	45674777	45681224	2	1852	5936.4	893.554	665	Tmem63b	Capn11,Mrpl14	Tmem63b	665	1
4_M00002_1_Fus1_T_CnR_ac4729_peak_18561_lociStitched	chr3	137146238	137156861	4	1753	6430.1	1387.36	666			Emcn	666	1
3_M00002_1_Fus1_T_CnR_ac4729_peak_3546_lociStitched	chr11	6000160	6011289	3	1369	6501.56	1460.12	667	Camk2b	Ykt6	Ykt6	667	1
2_M00002_1_Fus1_T_CnR_ac4729_peak_28187_lociStitched	chr9	63998236	64002067	2	1443	5809.71	773.096	668	Smad6	1110036E04Rik,1700055C04Rik	Smad6	668	1
2_M00002_1_Fus1_T_CnR_ac4729_peak_8429_lociStitched	chr14	45452251	45464141	2	1975	6619.16	1582.56	669	Fermt2		Gnpnat1	669	1
2_M00002_1_Fus1_T_CnR_ac4729_peak_12475_lociStitched	chr18	4591034	4603338	2	1997	6717.98	1681.96	670		9430020K01Rik	9430020K01Rik	670	1
3_M00002_1_Fus1_T_CnR_ac4729_peak_28568_lociStitched	chr9	95814157	95837206	3	1650	7497.84	2466.24	671	Pls1	Atr,1700065D16Rik	Pls1	671	1
2_M00002_1_Fus1_T_CnR_ac4729_peak_6501_lociStitched	chr12	108904077	108914102	2	1387	6309.73	1282.2	672	Wdr25	Wars	Wdr25	672	1
2_M00002_1_Fus1_T_CnR_ac4729_peak_24826_lociStitched	chr7	65978829	65982208	2	1848	5441.88	415.955	673	Pcsk6		Snrpa1	673	1
4_M00002_1_Fus1_T_CnR_ac4729_peak_106_lociStitched	chr1	16227504	16249693	4	2982	7193.67	2167.87	674	Stau2		Rdh10	674	1
3_M00002_1_Fus1_T_CnR_ac4729_peak_19530_lociStitched	chr4	81498783	81513361	3	1997	6832.71	1812.05	675		Mir466h	Mir466h	675	1
4_M00002_1_Fus1_T_CnR_ac4729_peak_27819_lociStitched	chr9	41474773	41488410	4	2260	7036.69	2021	676		Mir100,Mirlet7a-2	Mir100	676	1
3_M00002_1_Fus1_T_CnR_ac4729_peak_21128_lociStitched	chr5	29842109	29862020	3	2440	7126.15	2114.55	677			Gm5129	677	1
3_M00002_1_Fus1_T_CnR_ac4729_peak_22504_lociStitched	chr5	140759102	140771951	3	1640	7111.92	2108.52	678	Gna12	Amz1	Amz1	678	1
2_M00002_1_Fus1_T_CnR_ac4729_peak_17763_lociStitched	chr3	87088285	87098576	2	1061	6682.98	1683.61	679	Kirrel		Kirrel	679	1
3_M00002_1_Fus1_T_CnR_ac4729_peak_16010_lociStitched	chr2	134527729	134545647	3	1445	7251.41	2266.63	680	Hao1		Hao1	680	1
2_M00002_1_Fus1_T_CnR_ac4729_peak_15757_lociStitched	chr2	119298310	119300580	2	1567	5332.91	352.985	681	Vps18	Rhov,Gm14207,Dll4	Vps18	681	1
2_M00002_1_Fus1_T_CnR_ac4729_peak_22475_lociStitched	chr5	140082620	140094444	2	1958	6746.77	1771.24	682	Mad1l1		Elfn1	682	1
2_M00002_1_Fus1_T_CnR_ac4729_peak_3069_lociStitched	chr10	93294406	93306497	2	1546	6472.31	1496.87	683	Elk3	Gm17745	Elk3	683	1
3_M00002_1_Fus1_T_CnR_ac4729_peak_12074_lociStitched	chr17	62852112	62863172	3	1255	6073.05	1102.68	684	Efna5		Efna5	684	1
5_M00002_1_Fus1_T_CnR_ac4729_peak_15639_lociStitched	chr2	106842356	106857758	5	2259	6739.92	1772.77	685	Mpped2		Arl14ep	685	1
5_M00002_1_Fus1_T_CnR_ac4729_peak_23861_lociStitched	chr6	114874470	114902026	5	2482	8997.03	4036.95	686	Vgll4		Vgll4	686	1
4_M00002_1_Fus1_T_CnR_ac4729_peak_12401_lociStitched	chr17	87298738	87317530	4	1873	7623.91	2674.1	687	Ttc7	4833418N02Rik,Mcfd2	Ttc7	687	1
3_M00002_1_Fus1_T_CnR_ac4729_peak_9105_lociStitched	chr15	3375884	3398361	3	3226	7556.77	2618.57	688	Ghr		Ccdc152	688	1
2_M00002_1_Fus1_T_CnR_ac4729_peak_4561_lociStitched	chr11	79646524	79650787	2	1436	5668.08	733.236	689	Rab11fip4	4930542H20Rik,Gm11202	Gm11202	689	1
3_M00002_1_Fus1_T_CnR_ac4729_peak_13613_lociStitched	chr19	9065737	9082969	3	1305	7259.84	2328.04	690	Ahnak	Scgb1a1	Scgb1a1	690	1
3_M00002_1_Fus1_T_CnR_ac4729_peak_6298_lociStitched	chr12	91837149	91846469	3	2026	5948.02	1018.68	691	Sel1l	Sel1l	Sel1l	691	1
2_M00002_1_Fus1_T_CnR_ac4729_peak_6530_lociStitched	chr12	110540118	110547731	2	1082	6173.38	1247.01	692	Ppp2r5c	B930059L03Rik	B930059L03Rik	692	1
6_M00002_1_Fus1_T_CnR_ac4729_peak_13891_lociStitched	chr19	32172434	32189694	6	2831	7269.91	2350.81	693	Sgms1		Sgms1	693	1
5_M00002_1_Fus1_T_CnR_ac4729_peak_10387_lociStitched	chr16	10342093	10367129	5	2663	8487.2	3572.64	694	Tekt5	Emp2,Nubp1	Emp2	694	1
3_M00002_1_Fus1_T_CnR_ac4729_peak_21448_lociStitched	chr5	53509400	53523209	3	1415	6450.18	1539.7	695		Rbpj	Rbpj	695	1
1_M00002_1_Fus1_T_CnR_ac4729_peak_16516_lociStitched	chr2	166516595	166518245	1	1651	5124.4	222.09	696			5031425F14Rik	696	1
1_M00002_1_Fus1_T_CnR_ac4729_peak_21542_lociStitched	chr5	67841072	67842459	1	1388	5108.18	211.101	697	Atp8a1		Atp8a1	697	1
3_M00002_1_Fus1_T_CnR_ac4729_peak_9589_lociStitched	chr15	59585488	59608162	3	1480	8232.93	3337.61	698	Nsmce2	Trib1	Trib1	698	1
3_M00002_1_Fus1_T_CnR_ac4729_peak_2820_lociStitched	chr10	80270990	80282676	3	1753	7082.88	2191.12	699	Dazap1,Bc1	Reep6,Pcsk4,Apc2,2310011J03Rik,Rps15,Mum1,Gamt,Ndufs7,Dazap1	Dazap1	699	1
1_M00002_1_Fus1_T_CnR_ac4729_peak_4958_lociStitched	chr11	102168031	102169423	1	1393	5005.63	125.558	700	Lsm12	Nags,G6pc3,Tmem101	Tmem101	700	1
3_M00002_1_Fus1_T_CnR_ac4729_peak_22705_lociStitched	chr6	4487644	4502233	3	1880	6690.52	1823.62	701		Col1a2	Col1a2	701	1
3_M00002_1_Fus1_T_CnR_ac4729_peak_12337_lociStitched	chr17	84738084	84759111	3	1592	7304.78	2443.34	702	Lrpprc		Lrpprc	702	1
3_M00002_1_Fus1_T_CnR_ac4729_peak_23382_lociStitched	chr6	83443535	83457374	3	2122	6688.39	1830.9	703	B230319C09Rik	Dguok,Tet3	B230319C09Rik	703	1
