# Supplementary material for: ZFTA–RELA Dictates Oncogenic Transcriptional Programs to Drive Aggressive Supratentorial Ependymoma
Source: Oxford University Press journal article supplement (doi:10.1158/2159-8290.cd-20-1066), 2021-03-19
Supplement: 21598290cd201066-sup-247687_2_supp_6956003_qpb2vg.xlsx [file 21598290cd201066-sup-247687_2_supp_6956003_qpb2vg.xlsx]

## Sheet: HA-CRFUS1 CRCs cliques
Supplementary Table S8
Description: CRCs detected in mouse IUE ZRFUS1 driven ependymoma
CRC Module	Score
['SOX7', 'SP2', 'SOX3', 'PLAGL2', 'FOXO1', 'SRF', 'RELA', 'SMAD1', 'STAT3', 'ZFP3', 'HIC1']	284.091
['SMAD3', 'SRF', 'PLAGL2', 'SP2', 'FOXO1', 'STAT3', 'SOX2', 'NKX2-5', 'ZFP3', 'SMAD1', 'SOX3']	282.727
['TCF3', 'SP2', 'STAT3', 'SOX3', 'SOX2', 'ZFX', 'FOXO1', 'SMAD1', 'PLAGL2']	282.111
['SMAD3', 'SRF', 'PLAGL2', 'SP2', 'FOXO1', 'STAT3', 'SOX2', 'NKX2-5', 'ZFX', 'SMAD1', 'SOX3']	281.727
['SOX7', 'SP2', 'SOX2', 'FOXO1', 'STAT3', 'SMAD1', 'PLAGL2', 'SRF', 'SOX3', 'ZFP3']	281.7
['SMAD3', 'SRF', 'PLAGL2', 'SP2', 'FOXO1', 'MAFB', 'RELA', 'HIC1', 'ZFX', 'SMAD1', 'SOX3']	281.636
['SOX7', 'SP2', 'SOX3', 'PLAGL2', 'FOXO1', 'SRF', 'RELA', 'SMAD1', 'STAT3', 'ZIC3', 'HIC1', 'ZFX']	281.333
['SOX7', 'SP2', 'SOX3', 'GLI3', 'SOX11', 'FOXO1', 'RELA', 'SRF', 'STAT3', 'ZFP3', 'HIC1', 'FOXJ3', 'SMAD1']	281.308
['SPIC', 'ETS1', 'STAT3', 'FOXO3', 'RELA', 'SP2', 'SMAD1', 'FOXO1', 'ZFP3', 'FOXJ3', 'SOX9', 'RUNX2', 'RREB1']	281.231
['SMAD3', 'SRF', 'PLAGL2', 'SP2', 'FOXO1', 'MAFB', 'RELA', 'HIC1', 'ZFX', 'SMAD1', 'ETS1']	281.182
['SMAD3', 'SRF', 'PLAGL2', 'SP2', 'FOXO1', 'STAT3', 'SOX3', 'HIC1', 'RUNX2', 'ZFX', 'RELA', 'ZIC3', 'SMAD1']	281.154
['SPIC', 'ETS1', 'STAT3', 'FOXO3', 'RELA', 'SP2', 'SMAD1', 'FOXO1', 'ZFP3', 'FOXJ3', 'SOX7', 'RREB1']	280.833
['SMAD3', 'SRF', 'PLAGL2', 'SP2', 'FOXO1', 'STAT3', 'SOX3', 'HIC1', 'RUNX2', 'EBF1', 'ZFP3', 'RELA', 'SMAD1']	280.769
['SOX7', 'SP2', 'SOX2', 'FOXO1', 'STAT3', 'SMAD1', 'PLAGL2', 'SRF', 'SOX3', 'ZFX']	280.6
['SOX7', 'SP2', 'SOX3', 'GLI3', 'IRF1', 'SRF', 'FOXO1', 'RELA', 'STAT3', 'ZFP3', 'HIC1', 'FOXJ3', 'SMAD1']	280.538
['SMAD3', 'PLAGL2', 'SP2', 'SOX2', 'FOXO1', 'STAT3', 'ZSCAN2', 'SMAD1', 'SOX3', 'NKX2-5', 'ZFP3']	280.273
['SOX7', 'SP2', 'SOX2', 'FOXO1', 'STAT3', 'SMAD1', 'FOXP1', 'SRF', 'FOXJ3', 'FOXC1', 'ZFP3', 'SOX3']	280.25
['SOX7', 'SP2', 'ETS1', 'GLI3', 'RELA', 'SRF', 'SOX11', 'HIC1', 'EGR1', 'SMAD1', 'FOXO1', 'FOXJ3', 'STAT3', 'ZFP3']	280.214
['SOX7', 'SP2', 'SOX3', 'PLAGL2', 'FOXO1', 'MAF', 'STAT3', 'HIC1', 'ZFP3', 'RELA', 'SMAD1']	280.091
['SMAD3', 'SRF', 'PLAGL2', 'SP2', 'FOXO1', 'STAT3', 'SP8', 'HIC1', 'EBF1', 'ZFP3', 'RELA', 'SMAD1']	279.833
['SOX7', 'SP2', 'SOX3', 'PLAGL2', 'FOXO1', 'SRF', 'RELA', 'SMAD1', 'MAFB', 'HIC1', 'ZFP3']	279.818
['SMAD3', 'SRF', 'PLAGL2', 'SP2', 'FOXO1', 'MAFB', 'RELA', 'HIC1', 'EBF1', 'ZFP3', 'SOX3', 'SMAD1']	279.583
['SOX7', 'SP2', 'ETS1', 'PLAGL2', 'HIC1', 'FOXO1', 'SMAD1', 'SRF', 'RELA', 'ZFP3', 'STAT3', 'RFX1']	279.583
['SOX7', 'SP2', 'ETS1', 'GLI3', 'RELA', 'SRF', 'IRF1', 'HIC1', 'EGR1', 'FOXO1', 'STAT3', 'ZFP3', 'SMAD1', 'FOXJ3']	279.5
['SMAD3', 'SRF', 'ASCL2', 'ETS1', 'SP2', 'HIC1', 'RELA', 'PLAGL2', 'STAT3', 'ERG', 'RFX1']	279.455
['SMAD3', 'SRF', 'PLAGL2', 'SP2', 'FOXO1', 'STAT3', 'SOX2', 'NKX2-5', 'ZFP3', 'SMAD1', 'KLF7']	279.455
['SMAD3', 'SRF', 'PLAGL2', 'SP2', 'FOXO1', 'STAT3', 'ETS1', 'SMAD1', 'NKX2-5', 'HIC1', 'RUNX2', 'ZFX']	279.417
['SPIC', 'SOX2', 'FOXO1', 'STAT3', 'SP2', 'FOXO3', 'TCF3', 'MAX', 'SOX9', 'ZFX']	279.4
['SMAD3', 'SRF', 'PLAGL2', 'SP2', 'FOXO1', 'STAT3', 'SOX3', 'HIC1', 'RUNX2', 'EBF1', 'RELA', 'ZIC3', 'SMAD1']	279.385
['SOX7', 'SP2', 'ETS1', 'PLAGL2', 'HIC1', 'FOXO1', 'SMAD1', 'SRF', 'RELA', 'ZFP3', 'MAFB']	279.364
['SPIC', 'ETS1', 'STAT3', 'FOXO3', 'RELA', 'SP2', 'SMAD1', 'FOXO1', 'ZFP3', 'FOXJ3', 'SOX9', 'RUNX2', 'HIC1', 'SOX11']	279.286
['SMAD3', 'PLAGL2', 'SP2', 'SOX2', 'FOXO1', 'STAT3', 'ZSCAN2', 'SMAD1', 'SOX3', 'NKX2-5', 'ZFX']	279.273
['SMAD3', 'SRF', 'ASCL2', 'ETS1', 'SP2', 'HIC1', 'RELA', 'PLAGL2', 'MAFB', 'ERG']	279.2
['SPIC', 'SOX2', 'FOXO1', 'STAT3', 'SP2', 'FOXO3', 'TCF3', 'SMAD1', 'SOX9', 'ZFX']	279.2
['SMAD3', 'SRF', 'PLAGL2', 'SP2', 'FOXO1', 'MAFB', 'RELA', 'HIC1', 'EBF1', 'ZFP3', 'ETS1', 'SMAD1']	279.167
['SOX7', 'SP2', 'SOX2', 'FOXO1', 'STAT3', 'SMAD1', 'FOXP1', 'FOXO3', 'FOXC1', 'FOXJ3', 'ZFP3', 'SOX3']	279.167
['SMAD3', 'SRF', 'PLAGL2', 'SP2', 'FOXO1', 'STAT3', 'POU2F1', 'HIC1', 'RUNX2', 'ZFX', 'SOX3', 'SMAD1', 'ZIC3']	279
['SMAD3', 'SRF', 'PLAGL2', 'SP2', 'FOXO1', 'STAT3', 'POU2F1', 'HIC1', 'RUNX2', 'ZFX', 'SOX3', 'SMAD1', 'NKX2-5']	279
['SPIC', 'ETS1', 'STAT3', 'FOXO3', 'RELA', 'STAT5A', 'RUNX2', 'SOX9', 'RREB1', 'ZFP3', 'FOXO1', 'FOXJ3', 'SMAD1']	278.923
['SMAD3', 'SRF', 'ASCL2', 'ETS1', 'SP2', 'HIC1', 'RELA', 'PLAGL2', 'STAT3', 'ZIC3', 'RFX1']	278.909
['SOX7', 'SP2', 'SOX3', 'PLAGL2', 'FOXO1', 'SRF', 'RELA', 'SMAD1', 'MAFB', 'HIC1', 'ZFX']	278.818
['SPIC', 'ETS1', 'STAT3', 'FOXO3', 'RELA', 'SP2', 'SMAD1', 'FOXO1', 'ZFP3', 'FOXJ3', 'SOX7', 'HIC1', 'SOX11']	278.769
['SOX7', 'SP2', 'SOX3', 'GLI3', 'SOX11', 'FOXO1', 'RELA', 'SRF', 'STAT3', 'ZFP3', 'HIC1', 'FOXJ3', 'PRDM1']	278.692
['SMAD3', 'FOXO3', 'RELA', 'SP8', 'ZFP3', 'HIC1', 'FOXJ3', 'FOXO1', 'SP2', 'EBF1', 'SOX9', 'STAT3', 'HSF1', 'SMAD1']	278.571
['SMAD3', 'SRF', 'PLAGL2', 'SP2', 'FOXO1', 'MAFB', 'NKX2-5', 'SMAD1', 'ZFP3', 'SOX2', 'SOX3']	278.455
['SMAD3', 'SRF', 'PLAGL2', 'SP2', 'FOXO1', 'MAFB', 'NKX2-5', 'SMAD1', 'ZFX', 'HIC1', 'SOX3']	278.455
['SMAD3', 'SRF', 'PLAGL2', 'SP2', 'FOXO1', 'STAT3', 'SOX2', 'NKX2-5', 'ZFX', 'SMAD1', 'KLF7']	278.455
['TCF3', 'SP2', 'STAT3', 'HIC1', 'ASCL2', 'ETS1', 'EGR1', 'MAX', 'RARA', 'FOXO3', 'ZIC3']	278.364
['SOX7', 'SP2', 'ETS1', 'PLAGL2', 'HIC1', 'FOXO1', 'SMAD1', 'SRF', 'RELA', 'ZFX', 'MAFB']	278.364
['SMAD3', 'SRF', 'SP8', 'SOX9', 'HIC1', 'RELA', 'EBF1', 'FOXO1', 'SP2', 'MAFK', 'ZFP3', 'SMAD1', 'IRF1', 'STAT3', 'FOXJ3']	278.333
['SMAD3', 'SRF', 'SOX2', 'SOX9', 'FOXP1', 'SP2', 'NKX2-5', 'ZFP3', 'MAFK', 'MAFF', 'FOXO1', 'STAT3', 'FOXJ3', 'FOXC1', 'SMAD1', 'SOX3']	278.312
['SMAD3', 'SRF', 'GLI3', 'RELA', 'SP2', 'SOX3', 'FOXO1', 'MAFK', 'ZFP3', 'HIC1', 'SMAD1', 'EBF1', 'SOX9', 'RUNX2', 'STAT3', 'FOXJ3', 'SOX11']	278.235
['SPIC', 'ETS1', 'STAT3', 'ELF5', 'RREB1', 'RUNX2', 'FOXJ3', 'SOX9', 'RELA', 'ZFP3', 'FOXO1', 'SMAD1', 'SP2']	278.154
['TCF3', 'SP2', 'STAT3', 'KLF7', 'SOX2', 'FOXO1', 'SMAD1', 'PLAGL2', 'ZFX']	278.111
['SOX7', 'SP2', 'SOX2', 'FOXO1', 'STAT3', 'SOX3', 'MAX', 'IRF3', 'FOXK1', 'TFAP2C', 'FOXJ3']	278.091
['SMAD3', 'SRF', 'PLAGL2', 'SP2', 'FOXO1', 'STAT3', 'SOX3', 'HIC1', 'RUNX2', 'EBF1', 'ZFP3', 'NKX2-5', 'SMAD1']	278.077
['SOX7', 'SP2', 'ETS1', 'GLI3', 'RELA', 'SRF', 'SOX11', 'KLF7', 'SMAD1', 'FOXO1', 'FOXJ3', 'EGR1', 'STAT3', 'ZFP3']	278.071
['SMAD3', 'SRF', 'ASCL2', 'ETS1', 'SP2', 'HIC1', 'RELA', 'EGR1', 'PRDM1', 'MAFB', 'ERG', 'MAX']	278
['SMAD3', 'SRF', 'PLAGL2', 'SP2', 'FOXO1', 'MAFB', 'NKX2-5', 'SMAD1', 'ZFX', 'HIC1', 'ETS1']	278
['SMAD3', 'SRF', 'PLAGL2', 'SP2', 'FOXO1', 'STAT3', 'SOX3', 'HIC1', 'RUNX2', 'ZFP3', 'GLI2', 'RELA']	278
['SPIC', 'ETS1', 'STAT3', 'FOXO3', 'RELA', 'SP2', 'ZFP3', 'RREB1', 'FOXJ3', 'SOX7', 'PRDM1', 'FOXO1']	278
['SMAD3', 'SRF', 'SP8', 'SOX9', 'HIC1', 'RELA', 'EBF1', 'FOXO1', 'SP2', 'MAFK', 'ZFP3', 'SOX6', 'STAT3', 'FOXJ3']	277.929
['SOX7', 'SP2', 'SOX3', 'GLI3', 'IRF1', 'SRF', 'FOXO1', 'RELA', 'STAT3', 'ZFP3', 'HIC1', 'FOXJ3', 'PRDM1']	277.923
['SMAD3', 'PLAGL2', 'SP2', 'SOX3', 'MAF', 'FOXO1', 'RUNX2', 'ZSCAN2', 'SMAD1', 'STAT3', 'RELA', 'ZFX']	277.917
['TCF3', 'SP2', 'STAT3', 'SOX3', 'SOX2', 'ZFX', 'FOXO1', 'SMAD1', 'SOX9', 'FOXO3', 'ATF5']	277.909
['SOX7', 'SP2', 'SOX3', 'PLAGL2', 'FOXO1', 'SRF', 'RELA', 'GLI2', 'STAT3', 'ZFP3', 'HIC1']	277.909
['SOX7', 'SP2', 'SOX3', 'GLI3', 'SOX11', 'FOXO1', 'RELA', 'MAF', 'FOXO3', 'STAT3', 'ZFP3', 'HIC1', 'FOXJ3', 'SMAD1']	277.857
['SMAD3', 'IRF3', 'SP2', 'TFAP2C', 'SOX2', 'SOX9', 'FOXO1', 'STAT3', 'FOXK1', 'SMAD1', 'SOX3', 'FOXA2', 'FOXJ3']	277.846
['SMAD3', 'SRF', 'ASCL2', 'ETS1', 'SP2', 'HIC1', 'RELA', 'PLAGL2', 'STAT3', 'ZIC3', 'SPDEF']	277.818
['SOX7', 'SP2', 'ETS1', 'ASCL2', 'HIC1', 'EGR1', 'MAX', 'TFAP2C', 'SRF', 'MAFB', 'RELA']	277.818
['SMAD3', 'FOXO3', 'FOXP1', 'SOX2', 'SP2', 'SOX9', 'ZFP3', 'NKX2-5', 'SMAD1', 'FOXO1', 'MAFK', 'FOXJ3', 'STAT3', 'STAT6', 'SOX3', 'MAFF']	277.75
['SMAD3', 'SRF', 'PLAGL2', 'SP2', 'FOXO1', 'STAT3', 'ETS1', 'SMAD1', 'NKX2-5', 'HIC1', 'RUNX2', 'ZFP3', 'EBF1']	277.692
['SMAD3', 'SRF', 'PLAGL2', 'SP2', 'RELA', 'NR2F1', 'SOX3', 'ZIC3', 'STAT3', 'SMAD1', 'ZFX', 'HIC1', 'RUNX2']	277.692
['SOX7', 'SP2', 'SOX2', 'FOXO1', 'STAT3', 'SOX3', 'MAX', 'FOXP1', 'SRF', 'PBX3', 'FOXC1', 'TFAP2C', 'FOXJ3']	277.692
['NR2C2', 'STAT3', 'PLAGL2', 'SMAD1', 'FOXO1', 'SOX3']	277.667
['SMAD3', 'SRF', 'GLI3', 'RELA', 'SP2', 'SOX3', 'FOXO1', 'MAFK', 'ZFP3', 'HIC1', 'SMAD1', 'EBF1', 'SOX9', 'RUNX2', 'STAT3', 'FOXJ3', 'IRF1']	277.647
['SMAD3', 'PLAGL2', 'SP2', 'SP8', 'EBF1', 'FOXO1', 'ZSCAN2', 'RELA', 'ZFP3', 'SMAD1', 'STAT3']	277.636
['SMAD3', 'PLAGL2', 'SP2', 'SOX3', 'MAF', 'FOXO1', 'MAFB', 'HIC1', 'ZFX', 'SMAD1', 'RELA']	277.636
['SMAD3', 'FOXO3', 'RELA', 'SP8', 'ZFP3', 'HIC1', 'FOXJ3', 'FOXO1', 'STAT5A', 'SOX9', 'MAFK', 'SMAD1', 'STAT3', 'IRF1']	277.571
['SMAD3', 'SRF', 'GLI3', 'RELA', 'SP2', 'ETS1', 'EGR1', 'MAFK', 'HIC1', 'RUNX2', 'SOX9', 'FOXO1', 'STAT3', 'SOX11', 'SMAD1', 'FOXJ3', 'ZFP3', 'EBF1']	277.556
['SPIC', 'SOX2', 'FOXO1', 'STAT3', 'SP2', 'PLAGL2', 'SMAD1', 'ZFP3', 'NKX2-5']	277.556
['SMAD3', 'SRF', 'PLAGL2', 'SP2', 'FOXO1', 'MAFB', 'RELA', 'HIC1', 'ZFX', 'ERG', 'KLF5', 'ETS1']	277.5
['SMAD3', 'SRF', 'PLAGL2', 'SP2', 'FOXO1', 'STAT3', 'ETS1', 'SMAD1', 'RELA', 'ZIC3', 'HIC1', 'RFX1', 'RUNX2', 'ZFX']	277.5
['SMAD3', 'FOXO3', 'FOXP1', 'SOX2', 'SP2', 'SOX9', 'ZFP3', 'NKX2-5', 'SMAD1', 'FOXO1', 'MAFK', 'FOXJ3', 'STAT3', 'FOXC1', 'SOX3', 'MAFF']	277.5
['SPIC', 'ETS1', 'STAT3', 'ELF5', 'RREB1', 'SOX7', 'SP2', 'FOXO1', 'FOXJ3', 'ZFP3', 'SMAD1', 'RELA']	277.5
['SMAD3', 'FOXO3', 'RELA', 'SP8', 'ZFP3', 'HIC1', 'FOXJ3', 'FOXO1', 'SP2', 'EBF1', 'SOX9', 'STAT3', 'MAFK', 'SMAD1', 'IRF1']	277.467
['SMAD3', 'SRF', 'PLAGL2', 'SP2', 'FOXO1', 'MAFB', 'NKX2-5', 'SMAD1', 'ZFX', 'SOX2', 'SOX3']	277.455
['SMAD3', 'SRF', 'PLAGL2', 'SP2', 'SALL1', 'SOX3', 'NKX2-5', 'SMAD1', 'STAT3', 'ZFP3', 'SOX2']	277.455
['SMAD3', 'SRF', 'SOX2', 'SOX9', 'FOXP1', 'SP2', 'NKX2-5', 'ZFP3', 'MAFK', 'EGR1', 'KLF7', 'FOXO1', 'STAT3', 'FOXJ3', 'SMAD1', 'FOXC1']	277.438
['TCF3', 'SP2', 'STAT3', 'HIC1', 'RUNX2', 'POU2F1', 'ZFX', 'PLAGL2', 'SMAD1', 'SOX3', 'ZIC3', 'FOXO1']	277.417
['SOX7', 'SP2', 'SOX2', 'FOXO1', 'STAT3', 'SOX3', 'PRDM1', 'FOXP1', 'FOXJ3', 'ZFP3', 'FOXC1', 'SRF']	277.417
['SMAD3', 'SRF', 'ASCL2', 'ETS1', 'SP2', 'HIC1', 'RELA', 'EGR1', 'PRDM1', 'ERG', 'MAX', 'STAT3', 'SPDEF']	277.385
['SMAD3', 'PLAGL2', 'SP2', 'SOX3', 'MAF', 'FOXO1', 'RUNX2', 'HIC1', 'SMAD1', 'STAT3', 'ZFP3', 'EBF1', 'RELA']	277.385
['SOX7', 'SP2', 'SOX2', 'FOXO1', 'STAT3', 'SOX3', 'MAX', 'FOXP1', 'SRF', 'FOXK1', 'FOXJ3', 'FOXC1', 'TFAP2C']	277.385
['SOX7', 'SP2', 'ETS1', 'PLAGL2', 'HIC1', 'FOXO1', 'SMAD1', 'SRF', 'RELA', 'ZFX', 'ZIC3', 'STAT3', 'RFX1']	277.385
['FLI1', 'ETS1', 'PLAGL2', 'KLF5', 'SP2', 'RREB1', 'SOX7', 'FOXO1', 'STAT3', 'ZFP3', 'RELA']	277.364
['SOX7', 'SP2', 'ETS1', 'GLI3', 'RELA', 'SRF', 'IRF1', 'KLF7', 'EGR1', 'FOXO1', 'STAT3', 'SMAD1', 'FOXJ3', 'ZFP3']	277.357
['SMAD3', 'PLAGL2', 'SP2', 'SOX2', 'FOXO1', 'STAT3', 'ZSCAN2', 'SMAD1', 'RFX1', 'ZFP3']	277.3
['SMAD3', 'SRF', 'GLI3', 'RELA', 'SP2', 'ETS1', 'EGR1', 'ZIC3', 'RUNX2', 'HIC1', 'STAT3', 'SOX9', 'FOXO1', 'SOX11', 'SMAD1', 'FOXJ3', 'EBF1']	277.294
['SOX7', 'SP2', 'ETS1', 'GLI3', 'RELA', 'SRF', 'SOX11', 'KLF7', 'SMAD1', 'FOXO1', 'FOXJ3', 'EGR1', 'STAT3', 'TFAP2C']	277.286
