# Supplementary material for: ZFTA–RELA Dictates Oncogenic Transcriptional Programs to Drive Aggressive Supratentorial Ependymoma
Source: Oxford University Press journal article supplement (doi:10.1158/2159-8290.cd-20-1066), 2021-03-19
Supplement: 21598290cd201066-sup-247687_2_supp_6956004_qpb2vg.xlsx [file 21598290cd201066-sup-247687_2_supp_6956004_qpb2vg.xlsx]

## Sheet: Primers and Oligos
Supplementary Table S9
Description: Summary of oligos and sgRNA sequences used in the study
Primer	Sequence (5' to 3')	Application
Axl_F1	GGAACCCAGGGAATATCACAGG	qPCR
Axl_R1	AGTTCTAGGATCTGTCCATCTCG	qPCR
Ccnd1_F1	GCGTACCCTGACACCAATCTC	qPCR
Ccnd1_R1	ACTTGAAGTAAGATACGGAGGGC	qPCR
Dlk1_F1	AGTGCGAAACCTGGGTGTC	qPCR
Dlk1_R1	GCCTCCTTGTTGAAAGTGGTCA	qPCR
Ephb2_F1	GCCGTGGAAGAAACCCTGAT	qPCR
Ephb2_R1	GTTCATGTTCTCGTCGTAGCC	qPCR
Lmx1b_F1	TCCTGGCACGAGGAGTGTT	qPCR
Lmx1b_R1	AACTCGGTAGGGGCGATCTT	qPCR
Lmx1b_F2	TGCTGTGCAAGGGTGACTATG	qPCR
Lmx1b_R2	CGGGTCTTTCCCGTCATCTC	qPCR
Notch1_F1	GATGGCCTCAATGGGTACAAG	qPCR
Notch1_R1	GTTCATGTTCTCGTCGTAGCC	qPCR
Hprt1_F2	AGTCCCAGCGTCGTGATTAG	qPCR
Hprt1_F2	TTTCCAAATCCTCGGCATAATGA	qPCR
ID	Sequence (5' to 3')	Application
RelA sgRNA1	GCTCAATGATCTCCACATAG	CRFUS1 knock-out
RelA sgRNA3	GGAAGATCTCATCCCCACCG	CRFUS1 knock-out
D98 sgRNA	ATCGTTTCCGCTTAACGGCG	Non-targeting knock-out control
